# Supplementary material for: Cobalt-catalyzed cross-coupling of Umpolung carbonyls with alkyl halides under mild conditions
Source: Royal Society of Chemistry journal article supplement (doi:10.1039/d2cc04302e), 2022-01-01
Supplement: d2cc04302e1.pdf [file d2cc04302e1.pdf]

## Supplementary Information

### Co-catalyzed Cross-Coupling of Umpolung Carbonyls with Alkyl Halides under Mild Conditions

Ruofei Cheng,<sup>a</sup> Graham de Ruiter<sup>b</sup> and Chao-Jun Li<sup>\*,a</sup>

<sup>a</sup>Department of Chemistry, and FQRNT Centre for Green Chemistry and Catalysis,

McGill University, 801 Sherbrooke St. W., Montreal, Quebec H3A 0B8, Canada

<sup>b</sup>Schulich Faculty of Chemistry, Technion – Israel Institute of Technology, Technion

City, 3200008 Haifa, Israel

#### Table of Contents

|                                     |      |
|-------------------------------------|------|
| General Procedures                  | S2   |
| Optimization of reaction conditions | S2   |
| Synthesis of <b>3</b>               | S5   |
| Synthesis of <b>4</b>               | S16  |
| Mechanistic studies                 | S22  |
| NMR spectra of products             | S28  |
| References                          | S113 |

## General Procedures.

All reactions were carried out in flame-dried glassware under an atmosphere of dry N<sub>2</sub> with the rigid exclusion of air and moisture using standard Schlenk techniques or in a glovebox. All solvents were purified and dried by standard techniques prior to use. Compounds **1**, **1'** and **2g**<sup>1</sup> were prepared according to literature procedures. All other chemicals were purchased from commercial sources and used as received unless otherwise specified. <sup>1</sup>H, <sup>13</sup>C{<sup>1</sup>H} and <sup>19</sup>F{<sup>1</sup>H} NMR spectra were recorded on a Varian Inova 400 spectrometer at 400 MHz, 101 MHz and 377 MHz, respectively or on either a Varian Inova or a Bruker 500 spectrometer at 500 MHz, 126 MHz and 477 MHz, respectively. All signals were reported in ppm unit with references to the residual solvent resonances of the deuterated solvents for proton and carbon chemical shifts, and to external CCl<sub>4</sub> (0.00) for fluorine chemical shifts. EI-MS was obtained from the Agilent GC-MS system.

## Optimization of reaction conditions

**Table S1** Ligands screening for Co-catalyzed cross-coupling of aldehyde hydrazone with alkyl halide<sup>a</sup>

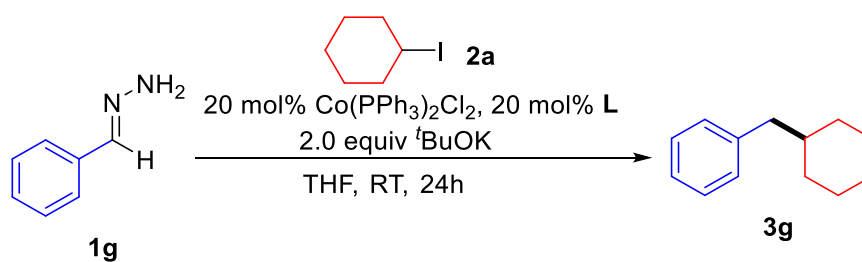

| Entry | L                              | <b>3g</b> (%) <sup>b</sup> |
|-------|--------------------------------|----------------------------|
| 1     | -                              | n.p.                       |
| 2     | L1                             | 8                          |
| 3     | 1,10-phen                      | 14                         |
| 4     | PMe <sub>3</sub>               | trace                      |
| 5     | PCy <sub>3</sub>               | 7                          |
| 6     | P <sup>n</sup> Bu <sub>3</sub> | 14                         |
| 7     | dppe                           | 11                         |
| 8     | dppb                           | 7                          |

|    |      |    |
|----|------|----|
| 9  | dppf | 15 |
| 10 | L2   | 9  |
| 11 | L3   | 21 |
| 12 | L4   | 12 |
| 13 | L5   | 36 |
| 14 | L6   | 21 |
| 15 | L7   | 35 |
| 16 | L8   | 28 |
| 17 | L9   | 30 |

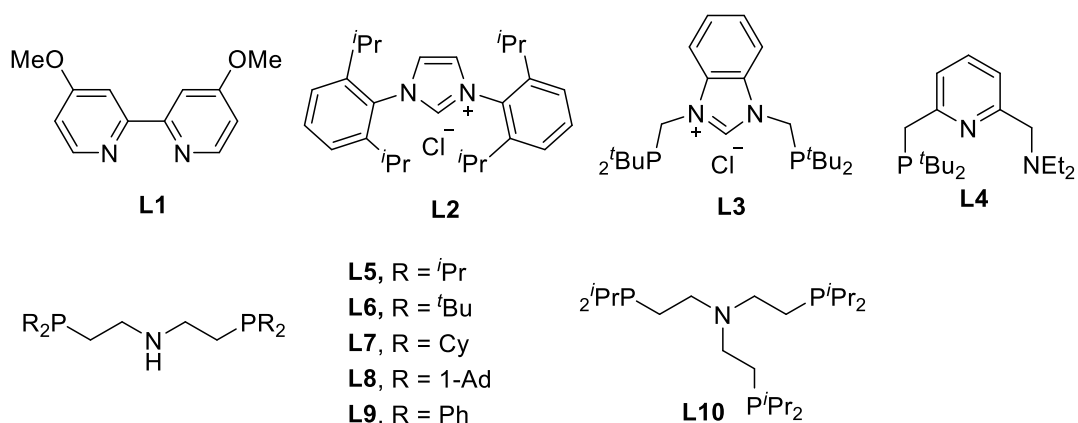

<sup>a</sup>General reaction conditions: **1g** (0.4 mmol, 2 equiv), **2a** (0.2 mmol), 20 mol% Co(PPh<sub>3</sub>)<sub>2</sub>Cl<sub>2</sub>, ligand (40 mol% for monodentate ligand, 20 mol% for bidentate and multidentate ligand), and *t*BuOK (2.0 equiv) in 1.0 mL 1,4-dioxane for 24 h. <sup>b</sup>Yields were determined by crude <sup>1</sup>H NMR using CH<sub>2</sub>Br<sub>2</sub> as an internal standard.

**Table S2** Evaluation of the reaction temperature, concentration as well as the amounts of ligand and hydrazone<sup>a</sup>

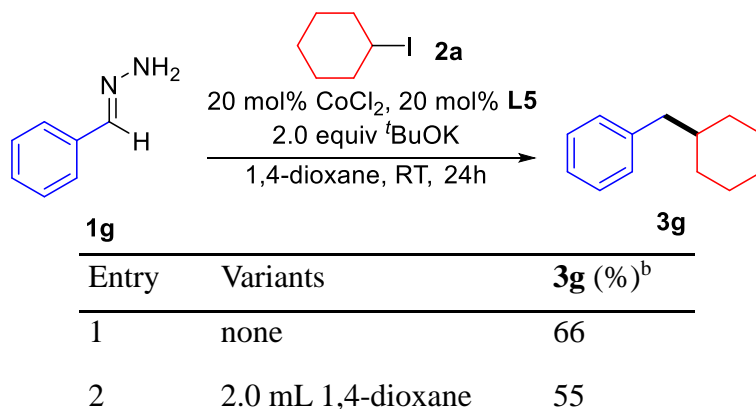

|   |                      |    |
|---|----------------------|----|
| 3 | 5 equiv <b>1g</b>    | 28 |
| 4 | 30 mol% <b>L5</b>    | 64 |
| 5 | 80 °C                | 25 |
| 6 | 45 °C                | 41 |
| 7 | 0 °C, THF as solvent | 23 |

<sup>a</sup>General reaction conditions: **1g** (0.4 mmol, 2 equiv), **2a** (0.2 mmol), 20 mol% CoCl<sub>2</sub>, 20 mol% **L5**, and <sup>t</sup>BuOK (2.0 equiv) in 1.0 mL 1,4-dioxane for 24 h, CoCl<sub>2</sub> and **L5** being dissolved in 0.5 mL of 1,4-dioxane and stirred at r.t. for 1 h in advance. <sup>b</sup>Yields were determined by crude <sup>1</sup>H NMR using CH<sub>2</sub>Br<sub>2</sub> as an internal standard.

**Table S3.** Optimization of Co-catalyzed cross-coupling of ketone hydrazone with alkyl halide<sup>a</sup>

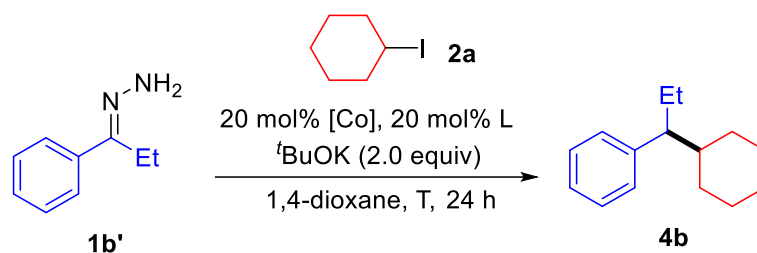

| Entry           | Pre-atalyst                                        | L  | T/ °C | Yield of <b>4</b> (%) <sup>b</sup> |
|-----------------|----------------------------------------------------|----|-------|------------------------------------|
| 1               | CoCl <sub>2</sub>                                  | L5 | RT    | 60                                 |
| 2               | Co(PPh <sub>3</sub> ) <sub>3</sub> Cl              | L5 | RT    | 66                                 |
| 3               | Co(acac) <sub>3</sub>                              | L5 | RT    | 50                                 |
| 4               | Co(PPh <sub>3</sub> ) <sub>3</sub> Cl              | L5 | RT    | 52                                 |
| 5               | Co(PPh <sub>3</sub> ) <sub>2</sub> Cl <sub>2</sub> | L6 | RT    | trace                              |
| 6               | Co(PPh <sub>3</sub> ) <sub>2</sub> Cl <sub>2</sub> | L7 | RT    | 75                                 |
| 7               | Co(PPh <sub>3</sub> ) <sub>2</sub> Cl <sub>2</sub> | L8 | RT    | 50                                 |
| 8               | Co(PPh <sub>3</sub> ) <sub>2</sub> Cl <sub>2</sub> | L9 | RT    | trace                              |
| 9               | Co(PPh <sub>3</sub> ) <sub>2</sub> Cl <sub>2</sub> | L7 | 80    | 35                                 |
| 10 <sup>c</sup> | Co(PPh <sub>3</sub> ) <sub>3</sub> Cl              | L7 | RT    | 68                                 |
| 11 <sup>d</sup> | -                                                  | -  | RT    | 70                                 |

<sup>a</sup>General reaction conditions: **1b'** (0.4 mmol, 2 equiv), **2a** (0.2 mmol), 20 mol% [Co]

pre-catalyst, 20 mol% **L**, and <sup>t</sup>BuOK (2.0 equiv) in 1.0 mL 1,4-dioxane for 24 h, [Co] pre-catalyst and **L** being dissolved in 0.5 mL of 1,4-dioxane and stirred at r.t. for 1 h in advance. <sup>b</sup>Yields were determined by crude <sup>1</sup>H NMR using CH<sub>2</sub>Br<sub>2</sub> as an internal standard. <sup>c</sup>30 mol% **L**. <sup>d</sup>20 mol% Complex **A** was used as catalyst.

### Preparation of Complex A.

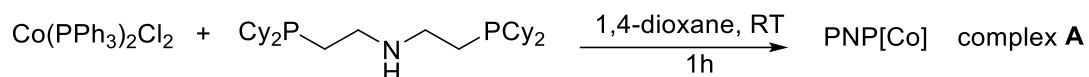

A flame-dried 25 mL flask equipped with a stir bar was charged with Co(PPh<sub>3</sub>)<sub>2</sub>Cl<sub>2</sub> (52 mg, 0.08 mmol) and **L7** (38 mg, 0.08 mmol), followed by dry 1,4-dioxane (1.0 mL). The mixture was stirred at room temperature for 1h under an atmosphere of nitrogen. After the completion of the reaction, the solution was filtered and washed with 1,4-dioxane (1 mL x 3), the resultant residue was collected and dried to give complex **A** (50 mg) as a pink solid.

(Note: the exact structure of complex **A** is unclear, we failed to recrystallize the complex **A** from different solvents)

### Synthesis of 3.

A flame-dried V-shape reaction vial (10 cm<sup>3</sup>) equipped with a stir bar was charged with CoCl<sub>2</sub> (5.2 mg, 0.04 mmol) and **L5** (120 mg, 10%wt in THF, 0.04 mmol), followed by dry 1,4-dioxane (0.5 mL). The mixture was stirred at room temperature for 1 h, to which were successively added **2** (0.20 mmol), **1** (0.4 mmol), potassium tert-butoxide (44.8 mg, 0.4 mmol) and dry 1,4-dioxane (0.5 mL). The vial was sealed with a rubber septum under an atmosphere of nitrogen, and then stirred at room temperature for 24 h. After the completion of the reaction, the solution was filtered in a short celite pad and washed with ethyl acetate (10 mL × 3). The solvent was removed under vacuum and the residue was purified by flash column chromatography to give the desired product **3**.

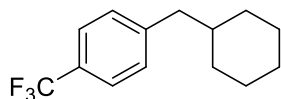

**1-(cyclohexylmethyl)-4-(trifluoromethyl)benzene** (CAS: 2281948-47-6).<sup>2</sup>

**3a:** colorless oil. Yield: 40%. TLC:  $R_f = 0.70$  (*n*-hexane).

**<sup>1</sup>H NMR** (400 MHz, CDCl<sub>3</sub>):  $\delta$  7.52 (d,  $J = 8.1$  Hz, 2H), 7.24 (d,  $J = 8.1$  Hz, 2H) (aromatic CH), 2.54 (d,  $J = 7.2$  Hz, 2H) (ArCH<sub>2</sub>), 1.74 – 1.62 (m, 5H), 1.57 – 1.49 (m, 1H), 1.26 – 1.10 (m, 3H), 1.02 – 0.88 (m, 2H) (cyclohexyl CH).

**<sup>13</sup>C{<sup>1</sup>H} NMR** (126 MHz, CDCl<sub>3</sub>):  $\delta$  145.5 (q,  $^4J_{CF} = 1.4$  Hz), 129.4, 128.0 (q,  $^2J_{CF} = 32.5$  Hz), 125.0 (q,  $^3J_{CF} = 4.3$  Hz) (aromatic C), 124.4 (q,  $^1J_{CF} = 271.9$  Hz) (CF<sub>3</sub>), 43.9 (ArCH<sub>2</sub>), 39.6, 33.1, 26.5, 26.2 (cyclohexyl C).

**<sup>19</sup>F{<sup>1</sup>H} NMR** (377 MHz, CDCl<sub>3</sub>)  $\delta$  -62.2.

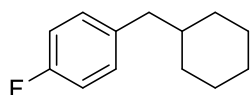

**1-(cyclohexylmethyl)-4-fluorobenzene** (CAS: 2227354-29-0).<sup>2</sup>

**3b:** colorless oil. Yield: 44%. TLC:  $R_f = 0.70$  (*n*-hexane).

**<sup>1</sup>H NMR** (500 MHz, CDCl<sub>3</sub>):  $\delta$  7.12 – 7.02 (m, 2H), 7.00 – 6.90 (m, 2H) (aromatic CH), 2.45 (d,  $J = 7.2$  Hz, 2H) (ArCH<sub>2</sub>), 1.74 – 1.60 (m, 5H), 1.51 – 1.43 (m, 1H), 1.27 – 1.09 (m, 3H), 0.96 – 0.87 (m, 2H) (cyclohexyl CH).

**<sup>13</sup>C{<sup>1</sup>H} NMR** (126 MHz, CDCl<sub>3</sub>):  $\delta$  161.3 (d,  $J = 242.7$  Hz), 137.0 (d,  $J = 3.2$  Hz), 130.5 (d,  $J = 7.5$  Hz), 114.9 (d,  $J = 20.9$  Hz) (aromatic C), 43.4 (ArCH<sub>2</sub>), 40.0, 33.2, 26.7, 26.4 (cyclohexyl C).

**<sup>19</sup>F NMR** (471 MHz, CDCl<sub>3</sub>)  $\delta$  -118.3.

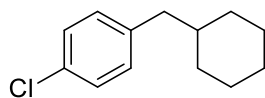

**1-chloro-4-(cyclohexylmethyl)benzene** (CAS: 98446-77-6).<sup>2</sup>

**3c:** colorless oil. Yield: 56%. TLC:  $R_f = 0.70$  (*n*-hexane).

**<sup>1</sup>H NMR** (400 MHz, CDCl<sub>3</sub>):  $\delta$  7.25 – 7.20 (m, 2H), 7.08 – 7.03 (m, 2H) (aromatic

CH), 2.45 (d,  $J = 7.2$  Hz, 2H) (ArCH<sub>2</sub>), 1.75 – 1.59 (m, 5H), 1.54 – 1.40 (m, 1H), 1.27 – 1.10 (m, 3H), 0.99 – 0.86 (m, 2H) (cyclohexyl CH).

<sup>13</sup>C{<sup>1</sup>H} NMR (126 MHz, CDCl<sub>3</sub>):  $\delta$  139.9, 131.4, 130.6, 128.3 (aromatic C), 43.5 (ArCH<sub>2</sub>), 39.9, 33.2, 26.7, 26.4 (cyclohexyl C).

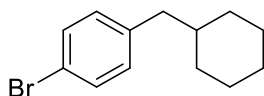

**1-bromo-4-(cyclohexylmethyl)benzene** (CAS: 1785619-14-8).<sup>2</sup>

**3d**: colorless oil. Yield: 51%. TLC:  $R_f = 0.70$  (*n*-hexane).

<sup>1</sup>H NMR (500 MHz, CDCl<sub>3</sub>):  $\delta$  7.41 – 7.34 (m, 2H), 7.04 – 6.98 (m, 2H) (aromatic CH), 2.43 (d,  $J = 7.2$  Hz, 2H) (ArCH<sub>2</sub>), 1.78 – 1.59 (m, 5H), 1.52 – 1.43 (m, 1H), 1.27 – 1.09 (m, 3H), 0.99 – 0.86 (m, 2H) (cyclohexyl CH).

<sup>13</sup>C{<sup>1</sup>H} NMR (101 MHz, CDCl<sub>3</sub>):  $\delta$  140.3, 131.1, 131.0, 119.3 (aromatic C), 43.5 (ArCH<sub>2</sub>), 39.7, 33.1, 26.5, 26.3 (cyclohexyl C).

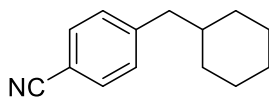

**4-(cyclohexylmethyl)benzotrile** (CAS: 98446-82-3).<sup>3</sup>

**3f**: colorless oil. Yield: 58%. TLC:  $R_f = 0.7$  (*n*-hexane : ethyl acetate = 10 : 1).

<sup>1</sup>H NMR (500 MHz, CDCl<sub>3</sub>):  $\delta$  7.55 (d,  $J = 8.4$  Hz, 2H), 7.23 (d,  $J = 8.2$  Hz, 2H) (aromatic CH), 2.53 (d,  $J = 7.2$  Hz, 2H) (ArCH<sub>2</sub>), 1.74 – 1.57 (m, 5H), 1.57 – 1.47 (m, 1H), 1.25 – 1.09 (m, 3H), 1.00 – 0.89 (m, 2H) (cyclohexyl CH).

<sup>13</sup>C{<sup>1</sup>H} NMR (126 MHz, CDCl<sub>3</sub>):  $\delta$  147.3, 132.0, 130.0, 119.3, 109.6 (CN & aromatic C), 44.3 (ArCH<sub>2</sub>), 39.7, 33.1, 26.5, 26.3 (cyclohexyl C).

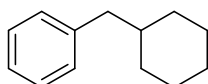

**(cyclohexylmethyl)benzene** (CAS: 3178-23-2).<sup>2</sup>

**3g**: colorless oil. Yield: 56%. TLC:  $R_f = 0.70$  (*n*-hexane).

**<sup>1</sup>H NMR** (500 MHz, CDCl<sub>3</sub>): δ 7.29 – 7.25 (m, 2H), 7.20 – 7.12 (m, 3H) (aromatic CH), 2.48 (d, *J* = 7.0 Hz, 2H) (PhCH<sub>2</sub>), 1.72 – 1.61 (m, 5H), 1.53 – 1.46 (m, 1H), 1.23 – 1.12 (m, 3H), 1.00 – 0.89 (m, 2H) (cyclohexyl CH).

These data are identical to those reported in the literature.

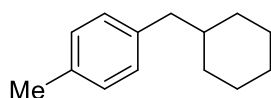

**1-(cyclohexylmethyl)-4-methylbenzene** (CAS: 92298-94-7).<sup>2</sup>

**3h**: colorless oil. Yield: 50%. TLC: R<sub>f</sub> = 0.70 (*n*-hexane).

**<sup>1</sup>H NMR** (400 MHz, CDCl<sub>3</sub>): δ 7.09 (d, *J* = 7.7 Hz, 2H), 7.03 (d, *J* = 8.2 Hz, 2H) (aromatic CH), 2.45 (d, *J* = 7.2 Hz, 2H) (ArCH<sub>2</sub>), 2.32 (s, 3H) (CH<sub>3</sub>), 1.73 – 1.61 (m, 5H), 1.52 – 1.42 (m, 1H), 1.25 – 1.12 (m, 3H), 1.00 – 0.87 (m, 2H) (cyclohexyl CH).

**<sup>13</sup>C{<sup>1</sup>H} NMR** (126 MHz, CDCl<sub>3</sub>): δ 138.4, 135.1, 129.2, 128.9 (aromatic C), 43.8 (ArCH<sub>2</sub>), 40.0, 33.3, 26.7, 26.5, 21.2 (cyclohexyl C & CH<sub>3</sub>).

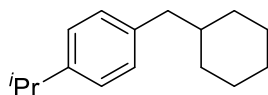

**3i**: colorless oil. Yield: 38%. TLC: R<sub>f</sub> = 0.70 (*n*-hexane).

**<sup>1</sup>H NMR** (400 MHz, CDCl<sub>3</sub>): δ 7.13 (d, *J* = 8.1 Hz, 2H), 7.06 (d, *J* = 8.1 Hz, 2H) (aromatic CH), 2.94 – 2.83 (m, 1H) (CH(CH<sub>3</sub>)<sub>2</sub>), 2.45 (d, *J* = 7.2 Hz, 2H) (ArCH<sub>2</sub>), 1.24 (d, *J* = 6.9 Hz, 6H) (CH(CH<sub>3</sub>)<sub>2</sub>), 1.73 – 1.66 (m, 4H), 1.66 – 1.60 (m, 1H), 1.53 – 1.45 (m, 1H), , 1.22 – 1.10 (m, 3H), 1.00 – 0.89 (m, 2H) (cyclohexyl CH).

**<sup>13</sup>C{<sup>1</sup>H} NMR** (126 MHz, CDCl<sub>3</sub>): δ 146.1, 138.8, 129.2, 126.2 (aromatic C), 43.9 (ArCH<sub>2</sub>), 39.9, 33.8, 33.4, 26.8, 26.5, 24.2. (cyclohexyl C & *iso*-propyl C).

HRMS (APCI) *m/z*: calcd for C<sub>16</sub>H<sub>23</sub><sup>+</sup> [M-H]<sup>+</sup>: 215.1794, found: 215.1803.

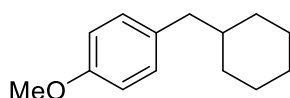

**1-(cyclohexylmethyl)-4-methoxybenzene** (13724-70-4).<sup>4</sup>



**3j**: colorless oil. Yield: 53%. TLC:  $R_f = 0.60$  (*n*-hexane : ethyl acetate = 10 : 1).

$^1\text{H NMR}$  (400 MHz,  $\text{CDCl}_3$ ):  $\delta$  7.09 – 7.02 (m, 2H), 6.86 – 6.79 (m, 2H) (aromatic *CH*), 3.79 (s, 3H) ( $\text{CH}_3$ ), 2.42 (d,  $J = 7.2$  Hz, 2H) ( $\text{ArCH}_2$ ), 1.74 – 1.62 (m, 5H), 1.52 – 1.41 (m, 1H), 1.26 – 1.13 (m, 3H), 0.99 – 0.85 (m, 2H) (cyclohexyl *CH*).

$^{13}\text{C}\{^1\text{H}\}$  NMR (126 MHz,  $\text{CDCl}_3$ ):  $\delta$  157.7, 133.6, 130.2, 113.6 (aromatic *C*), 55.4 ( $\text{ArCH}_2$ ), 43.3, 40.1, 33.2, 26.7, 26.5 (cyclohexyl *C* &  $\text{OCH}_3$ ).

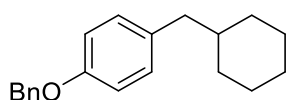

**1-(benzyloxy)-4-(cyclohexylmethyl)benzene** (CAS: 2281948-49-8).<sup>2</sup>

**3k**: white solid. Yield: 50%. TLC:  $R_f = 0.55$  (*n*-hexane : ethyl acetate = 10 : 1).

$^1\text{H NMR}$  (400 MHz,  $\text{CDCl}_3$ ):  $\delta$  7.49 – 7.43 (m, 2H), 7.40 (t,  $J = 7.3$  Hz, 2H), 7.34 (t,  $J = 7.2$  Hz, 1H), 7.13 – 7.03 (m, 2H), 6.95 – 6.87 (m, 2H) (aromatic *CH*), 5.06 (s, 2H) ( $\text{OCH}_2$ ), 2.45 (d,  $J = 7.2$  Hz, 2H) ( $\text{ArCH}_2\text{Cy}$ ), 1.77 – 1.59 (m, 5H), 1.53 – 1.39 (m, 1H), 1.32 – 1.09 (m, 3H), 1.04 – 0.86 (m, 2H) (cyclohexyl *CH*).

$^{13}\text{C}\{^1\text{H}\}$  NMR (126 MHz,  $\text{CDCl}_3$ ):  $\delta$  157.0, 137.4, 133.9, 130.2, 128.7, 128.0, 127.6, 114.5 (aromatic *C*), 70.2 ( $\text{OCH}_2$ ), 43.4 ( $\text{ArCH}_2\text{Cy}$ ), 40.1, 33.3, 26.7, 26.5 (cyclohexyl *C*).

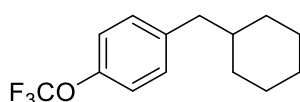

**3l**: colorless oil. Yield: 57%. TLC:  $R_f = 0.60$  (*n*-hexane : ethyl acetate = 10 : 1).

$^1\text{H NMR}$  (500 MHz,  $\text{CDCl}_3$ ):  $\delta$  7.21 – 7.00 (m, 4H) (aromatic *CH*), 2.48 (d,  $J = 7.2$  Hz, 2H) ( $\text{ArCH}_2$ ), 1.73 – 1.62 (m, 5H), 1.54 – 1.46 (m, 1H), 1.26 – 1.10 (m, 3H), 1.00 – 0.88 (m, 2H) (cyclohexyl *CH*).

$^{13}\text{C}\{^1\text{H}\}$  NMR (126 MHz,  $\text{CDCl}_3$ ):  $\delta$  147.4, 140.2, 130.4, 120.8 (aromatic *C*), 120.7 (q,  $J = 256.3$  Hz) ( $\text{CF}_3$ ), 43.5 ( $\text{ArCH}_2$ ), 39.9, 33.2, 26.6, 26.4 (cyclohexyl *C*).  $^{19}\text{F}\{^1\text{H}\}$  NMR (377 MHz,  $\text{CDCl}_3$ )  $\delta$  -57.9.

HRMS (APCI) *m/z*: calcd for  $\text{C}_{14}\text{H}_{16}\text{F}_3\text{O}^+$  [ $\text{M}-\text{H}$ ]<sup>+</sup>: 257.1148, found: 257.1153.

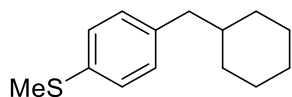

**(4-(cyclohexylmethyl)phenyl)(methyl)sulfane** (CAS: 716341-30-9).<sup>5</sup>

**3m**: colorless oil. Yield: 55%. TLC:  $R_f = 0.70$  (*n*-hexane : ethyl acetate = 10 : 1).

**<sup>1</sup>H NMR** (500 MHz, CDCl<sub>3</sub>):  $\delta$  7.18 (dt,  $J = 8.4, 2.2$  Hz, 2H), 7.18 (dt,  $J = 8.4, 2.2$  Hz, 2H) (aromatic CH), 2.47 (s, 3H) (CH<sub>3</sub>), 2.44 (d,  $J = 7.2$  Hz, 2H) (ArCH<sub>2</sub>), 1.71 – 1.60 (m, 5H), 1.53 – 1.45 (m, 1H), 1.23 – 1.10 (m, 3H), 0.98 – 0.86 (m, 2H) (cyclohexyl CH).

**<sup>13</sup>C{<sup>1</sup>H} NMR** (126 MHz, CDCl<sub>3</sub>):  $\delta$  138.7, 135.0, 130.0, 127.1 (aromatic C), 43.7 (ArCH<sub>2</sub>), 39.9, 33.2, 26.7, 26.4, 16.5 (cyclohexyl C & SCH<sub>3</sub>).

HRMS (APCI) *m/z*: calcd for C<sub>14</sub>H<sub>21</sub>S<sup>+</sup> [M+H<sup>+</sup>]: 221.1358, found: 221.1349.

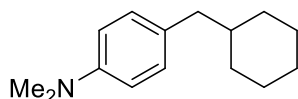

**4-(cyclohexylmethyl)-N,N-dimethylaniline** (CAS: 2243586-50-5).<sup>2</sup>

**3n**: colorless oil. Yield: 59%. TLC:  $R_f = 0.60$  (*n*-hexane : ethyl acetate = 10 : 1).

**<sup>1</sup>H NMR** (400 MHz, CDCl<sub>3</sub>):  $\delta$  7.03 (dt,  $J = 8.7, 2.9$  Hz, 2H), 6.71 (d,  $J = 8.7$  Hz, 2H) (aromatic CH), 2.92 (s, 6H) (CH<sub>3</sub>), 2.39 (d,  $J = 7.2$  Hz, 2H) (ArCH<sub>2</sub>), 1.76 – 1.61 (m, 5H), 1.53 – 1.41 (m, 1H), 1.26 – 1.10 (m, 3H), 0.99 – 0.85 (m, 2H) (cyclohexyl CH).

**<sup>13</sup>C{<sup>1</sup>H} NMR** (126 MHz, CDCl<sub>3</sub>):  $\delta$  149.0, 130.0, 113.4, 113.0 (aromatic C), 43.2, 41.1, 40.1, 33.3, 26.8, 26.5 (NCH<sub>3</sub>, ArCH<sub>2</sub> & cyclohexyl C).

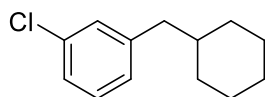

**1-chloro-3-(cyclohexylmethyl)benzene** (CAS: 220866-37-5).<sup>2</sup>

**3o**: colorless oil. Yield: 45%. TLC:  $R_f = 0.70$  (*n*-hexane).

**<sup>1</sup>H NMR** (400 MHz, CDCl<sub>3</sub>):  $\delta$  7.24 – 7.07 (m, 3H), 7.01 (dt,  $J = 7.2, 1.7$  Hz, 1H) (aromatic CH), 2.45 (d,  $J = 7.2$  Hz, 2H) (ArCH<sub>2</sub>), 1.76 –

1.57 (m, 5H), 1.53 – 1.43 (m, 1H), 1.28 – 1.07 (m, 3H), 1.02 – 0.83 (m, 2H) (cyclohexyl CH).

$^{13}\text{C}\{^1\text{H}\}$  NMR (126 MHz,  $\text{CDCl}_3$ ):  $\delta$  143.6, 134.0, 129.4, 129.3, 127.5, 125.9 (aromatic C), 43.9 ( $\text{ArCH}_2$ ), 39.8, 33.2, 26.6, 26.4 (cyclohexyl C).

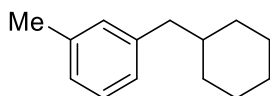

**1-(cyclohexylmethyl)-3-methylbenzene** (CAS: 93536-67-5).<sup>2</sup>

**3p**: colorless oil. Yield: 65%. TLC:  $R_f = 0.70$  (*n*-hexane).

$^1\text{H}$  NMR (400 MHz,  $\text{CDCl}_3$ ):  $\delta$  7.16 (t,  $J = 7.5$  Hz, 1H), 7.04 – 6.89 (m, 3H) (aromatic CH), 2.44 (d,  $J = 7.1$  Hz, 2H) ( $\text{ArCH}_2$ ), 2.33 (s, 3H) ( $\text{CH}_3$ ), 1.75 – 1.60 (m, 5H), 1.53 – 1.43 (m, 1H), 1.28 – 1.12 (m, 3H), 1.01 – 0.87 (m, 2H) (cyclohexyl CH).

$^{13}\text{C}\{^1\text{H}\}$  NMR (126 MHz,  $\text{CDCl}_3$ ):  $\delta$  141.5, 137.7, 130.1, 128.0, 126.4 (aromatic C), 44.2 ( $\text{ArCH}_2$ ), 39.9, 33.4, 26.7, 26.5, 21.6 (cyclohexyl C &  $\text{CH}_3$ ).

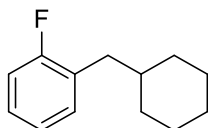

**1-(cyclohexylmethyl)-2-fluorobenzene** (CAS: 2281948-52-3).<sup>2</sup>

**3q**: colorless oil. Yield: 39%. TLC:  $R_f = 0.70$  (*n*-hexane).

$^1\text{H}$  NMR (400 MHz,  $\text{CDCl}_3$ ):  $\delta$  7.21 – 7.08 (m, 2H), 7.08 – 6.94 (m, 2H) (aromatic CH), 2.52 (d,  $J = 7.2$  Hz, 2H) ( $\text{ArCH}_2$ ), 1.72 – 1.62 (m, 5H), 1.27 – 1.14 (m, 4H), 1.02 – 0.93 (m, 2H) (cyclohexyl CH).

$^{13}\text{C}\{^1\text{H}\}$  NMR (101 MHz,  $\text{CDCl}_3$ ):  $\delta$  161.5 (d,  $J = 244.1$  Hz), 131.7 (d,  $J = 5.2$  Hz), 128.3 (d,  $J = 16.2$  Hz), 127.4 (d,  $J = 7.9$  Hz), 123.7 (d,  $J = 3.6$  Hz), 115.2 (d,  $J = 22.5$  Hz) (aromatic C), 124.4 (q,  $^1J_{\text{CF}} = 271.9$  Hz) ( $\text{CF}_3$ ), 38.3 ( $\text{ArCH}_2$ ), 38.9, 37.0, 33.2, 26.6, 26.4 (cyclohexyl C).

$^{19}\text{F}\{^1\text{H}\}$  NMR (377 MHz,  $\text{CDCl}_3$ ):  $\delta$  -114.7.

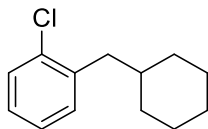

**1-chloro-2-(cyclohexylmethyl)benzene** (CAS: 2252403-02-2).<sup>2</sup>

**3r**: colorless oil. Yield: 43%. TLC:  $R_f = 0.70$  (*n*-hexane).

**<sup>1</sup>H NMR** (500 MHz, CDCl<sub>3</sub>):  $\delta$  7.34 – 7.32 (m, 1H), 7.18 – 7.14 (m, 2H), 7.14 – 7.09 (m, 1H) (aromatic CH), 2.61 (d,  $J = 7.0$  Hz, 2H) (ArCH<sub>2</sub>), 1.72 – 1.60 (m, 6H), 1.26 – 1.13 (m, 3H), 1.06 – 0.95 (m, 2H) (cyclohexyl CH).

**<sup>13</sup>C{<sup>1</sup>H} NMR** (126 MHz, CDCl<sub>3</sub>):  $\delta$  139.1, 134.4, 131.6, 129.6, 127.2, 126.4 (aromatic C), 41.5 (ArCH<sub>2</sub>), 38.3, 33.3, 26.7, 26.4 (cyclohexyl C).

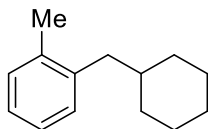

**1-(cyclohexylmethyl)-2-methylbenzene** (CAS: 92298-93-6).<sup>2</sup>

**3s**: colorless oil. Yield: 49%. TLC:  $R_f = 0.70$  (*n*-hexane).

**<sup>1</sup>H NMR** (400 MHz, CDCl<sub>3</sub>):  $\delta$  7.17 – 6.94 (m, 4H) (aromatic CH), 2.48 (d,  $J = 7.2$  Hz, 2H) (ArCH<sub>2</sub>), 2.30 (s, 3H) (CH<sub>3</sub>), 1.77 – 1.61 (m, 5H), 1.49 (m, 1H), 1.22 – 1.13 (m, 3H), 0.99 (m 2H) (cyclohexyl CH).

**<sup>13</sup>C{<sup>1</sup>H} NMR** (126 MHz, CDCl<sub>3</sub>):  $\delta$  139.8, 136.4, 130.3, 130.2, 125.8, 125.6 (aromatic C), 41.4 (ArCH<sub>2</sub>), 38.9, 33.6, 26.8, 26.6, 19.7 (cyclohexyl C & CH<sub>3</sub>).

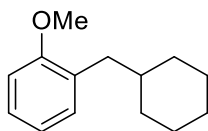

**1-(cyclohexylmethyl)-2-methoxybenzene** (CAS: 92300-32-8).<sup>6</sup>

**3t**: colorless oil. Yield: 57%. TLC:  $R_f = 0.75$  (*n*-hexane : ethyl acetate = 10 : 1).

**<sup>1</sup>H NMR** (400 MHz, CDCl<sub>3</sub>):  $\delta$  7.16 (td,  $J = 7.8, 1.8$  Hz, 1H), 7.07 (dd,  $J = 7.4, 1.8$  Hz, 1H), 6.89 – 6.82 (m, 2H) (aromatic CH), 3.81 (s, 3H) (CH<sub>3</sub>), 2.49 (d,  $J = 7.2$  Hz, 2H) (ArCH<sub>2</sub>), 1.71 – 1.59 (m, 5H), 1.59 – 1.54 (m, 1H), 1.26 – 1.11 (m, 3H), 1.02 –

0.88 (m, 2H) (cyclohexyl CH).

$^{13}\text{C}\{^1\text{H}\}$  NMR (126 MHz,  $\text{CDCl}_3$ ):  $\delta$  157.8, 131.0, 130.0, 126.9, 120.2, 110.4 (aromatic C), 55.4 (ArCH<sub>2</sub>), 38.3, 38.1, 33.5, 26.8, 26.5 (cyclohexyl C & CH<sub>3</sub>).

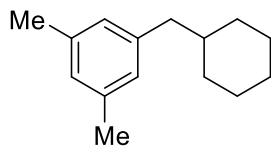

**3u**: colorless oil. Yield: 60%. TLC:  $R_f = 0.70$  (*n*-hexane).

$^1\text{H}$  NMR (400 MHz,  $\text{CDCl}_3$ ):  $\delta$  6.82 (s, 1H), 6.77 (s, 2H) (aromatic CH), 2.41 (d,  $J = 7.2$  Hz, 2H) (ArCH<sub>2</sub>), 2.30 (s, 6H) (CH<sub>3</sub>), 1.76 – 1.59 (m, 5H), 1.53 – 1.44 (m, 1H), 1.28 – 1.09 (m, 3H), 0.98 – 0.88 (m, 2H) (cyclohexyl CH).

$^{13}\text{C}\{^1\text{H}\}$  NMR (126 MHz,  $\text{CDCl}_3$ ):  $\delta$  141.5, 137.5, 127.3, 127.2 (aromatic C), 44.2 (ArCH<sub>2</sub>), 39.9, 33.4, 26.8, 26.5, 21.4 (cyclohexyl C).

HRMS (APCI)  $m/z$ : calcd for  $\text{C}_{15}\text{H}_{21}^+$  [M-H]<sup>+</sup>: 201.1638, found: 201.1646.

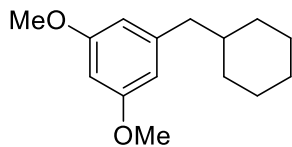

**1-(cyclohexylmethyl)-3,5-dimethoxybenzene** (CAS: 52692-16-7).<sup>7</sup>

**3v**: colorless oil. Yield: 65%. TLC:  $R_f = 0.6$  (*n*-hexane : ethyl acetate = 10 : 1).

$^1\text{H}$  NMR (400 MHz,  $\text{CDCl}_3$ ):  $\delta$  6.31 (m, 3H) (aromatic CH), 3.79 (s, 6H) (OCH<sub>3</sub>), 2.43 (d,  $J = 7.2$  Hz, 2H) (ArCH<sub>2</sub>), 1.77 – 1.61 (m, 5H), 1.60 – 1.45 (m, 1H), 1.28 – 1.12 (m, 3H), 0.95 (m, 2H) (cyclohexyl CH).

$^{13}\text{C}\{^1\text{H}\}$  NMR (126 MHz,  $\text{CDCl}_3$ ):  $\delta$  160.6, 144.0, 107.4, 97.6 (aromatic C), 55.3 (ArCH<sub>2</sub>), 44.6, 39.7, 33.4, 26.7, 26.5 (cyclohexyl C & CH<sub>3</sub>).

HRMS (ESI)  $m/z$ : calcd for  $\text{C}_{15}\text{H}_{22}\text{O}_2\text{Na}^+$  [M+Na]<sup>+</sup>: 257.1512, found: 257.1507.

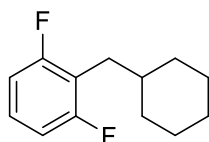

**3w**: colorless oil. Yield: 40%. TLC:  $R_f = 0.70$  (*n*-hexane).

$^1\text{H NMR}$  (400 MHz,  $\text{CDCl}_3$ ):  $\delta$  7.17 – 7.06 (m, 1H), 6.89 – 6.75 (m, 2H) (aromatic CH), 2.55 (d,  $J = 7.2$  Hz, 2H) ( $\text{ArCH}_2$ ), 1.79 – 1.60 (m, 5H), 1.59 – 1.51 (m, 1H), 1.29 – 1.11 (m, 3H), 1.08 – 0.94 (m, 2H) (cyclohexyl CH).

$^{13}\text{C}\{^1\text{H}\}$  NMR (101 MHz,  $\text{CDCl}_3$ ):  $\delta$  161.9 (dd,  $J = 246.0, 9.2$  Hz), 127.2 (t,  $J = 10.3$  Hz), 117.0 (t,  $J = 20.7$  Hz), 110.9 (dd,  $J = 19.5, 7.4$  Hz) (aromatic C), 124.4 (q,  $^1J_{\text{CF}} = 271.9$  Hz) ( $\text{CF}_3$ ), 38.3 ( $\text{ArCH}_2$ ), 33.1, 29.9, 26.6, 26.4. (cyclohexyl C).

$^{19}\text{F}\{^1\text{H}\}$  NMR (377 MHz,  $\text{CDCl}_3$ )  $\delta$  -114.7.

HRMS (APCI) Calcd for  $\text{C}_{13}\text{H}_{17}\text{F}_2^+$  [ $\text{M}+\text{H}^+$ ]: 211.1292. Found: 211.1289.

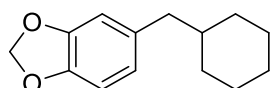

**3x**: colorless oil. Yield: 55%. TLC:  $R_f = 0.6$  (*n*-hexane : ethyl acetate = 10 : 1).

$^1\text{H NMR}$  (500 MHz,  $\text{CDCl}_3$ ):  $\delta$  6.71 (d,  $J = 7.8$  Hz, 1H), 6.64 (d,  $J = 1.7$  Hz, 1H), 6.57 (dd,  $J = 7.9, 1.8$  Hz, 1H) (aromatic CH), 5.91 (s, 2H) ( $\text{OCH}_2\text{O}$ ), 2.40 (d,  $J = 7.1$  Hz, 2H) ( $\text{ArCH}_2$ ), 1.72 – 1.60 (m, 5H), 1.50 – 1.38 (m, 1H), 1.25 – 1.10 (m, 3H), 0.98 – 0.85 (m, 2H) (cyclohexyl CH).

$^{13}\text{C}\{^1\text{H}\}$  NMR (126 MHz,  $\text{CDCl}_3$ ):  $\delta$  147.5, 145.5, 135.4, 122.0, 109.6, 108.0, 100.8 (aromatic C &  $\text{OCH}_2\text{O}$ ), 44.0 ( $\text{ArCH}$ ), 40.1, 33.2, 31.1, 26.7, 26.5 (cyclohexyl C).

HRMS (APCI)  $m/z$ : calcd for  $\text{C}_{14}\text{H}_{19}\text{O}_2^+$  [ $\text{M}+\text{H}^+$ ]: 219.1380, found: 219.1376.

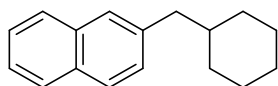

**2-(cyclohexylmethyl)naphthalene** (CAS: 38287-05-7).<sup>2</sup>

**3y**: colorless oil. Yield: 35%. TLC:  $R_f = 0.65$  (*n*-hexane).

$^1\text{H NMR}$  (500 MHz,  $\text{CDCl}_3$ ):  $\delta$  7.87 – 7.73 (m, 3H), 7.58 (s, 1H), 7.51 – 7.39 (m, 2H), 7.31 (dd,  $J = 8.4, 1.8$  Hz, 1H) (aromatic CH), 2.65 (d,  $J = 7.2$  Hz, 2H) ( $\text{ArCH}_2$ ), 1.76 – 1.67 (m, 4H), 1.67 – 1.58 (m, 2H), 1.27 – 1.10 (m, 3H), 1.06 – 0.94 (m, 2H) (cyclohexyl CH).

$^{13}\text{C}\{^1\text{H}\}$  NMR (126 MHz,  $\text{CDCl}_3$ ):  $\delta$  139.1, 133.6, 132.1, 128.2, 127.7, 127.6, 127.5, 127.4, 125.9, 125.1 (aromatic C), 44.4 ( $\text{ArCH}_2$ ), 39.9, 33.4, 26.7, 26.5 (cyclohexyl C).

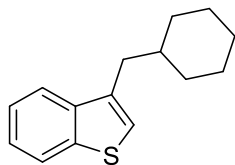

**3-(cyclohexylmethyl)benzo[*b*]thiophene** (CAS: 2281948-55-6).<sup>2</sup>

**3z:** colorless oil. Yield: 25%. TLC:  $R_f = 0.7$  (*n*-hexane : ethyl acetate = 10 : 1).

$^1\text{H}$  NMR (400 MHz,  $\text{CDCl}_3$ ):  $\delta$  7.86 (dt,  $J = 7.7, 1.1$  Hz, 1H), 7.79 – 7.71 (m, 1H), 7.42 – 7.30 (m, 2H), 7.05 (s, 1H) (aromatic CH), 2.73 (d,  $J = 6.1$  Hz, 2H) ( $\text{ArCH}_2$ ), 1.80 – 1.63 (m, 6H), 1.22 – 1.17 (m, 2H), 1.07 – 0.96 (m, 2H), 0.90 – 0.78 (m, 1H) (cyclohexyl CH).

$^{13}\text{C}\{^1\text{H}\}$  NMR (126 MHz,  $\text{CDCl}_3$ ):  $\delta$  140.6, 139.6, 135.8, 124.1, 123.8, 123.0, 122.1, 121.9 (aromatic C), 38.1 ( $\text{ArCH}_2$ ), 36.7, 33.7, 26.7, 26.4 (cyclohexyl C).

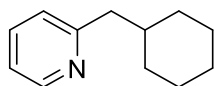

**2-(cyclohexylmethyl)pyridine** (CAS: 57756-06-6).<sup>8</sup>

**3aa:** colorless oil. Yield: 23%. TLC:  $R_f = 0.7$  (*n*-hexane : ethyl acetate = 10 : 1).

$^1\text{H}$  NMR (400 MHz,  $\text{CDCl}_3$ ):  $\delta$  8.57 – 8.51 (m, 1H), 7.57 (td,  $J = 7.6, 1.9$  Hz, 1H), 7.20 – 6.99 (m, 2H) (aromatic CH), 2.66 (d,  $J = 7.1$  Hz, 2H) ( $\text{ArCH}_2$ ), 1.82 – 1.72 (m, 1H), 1.70 – 1.63 (m, 5H), 1.27 – 1.16 (m, 3H), 1.09 – 0.93 (m, 2H) (cyclohexyl CH).

$^{13}\text{C}\{^1\text{H}\}$  NMR (126 MHz,  $\text{CDCl}_3$ ):  $\delta$  161.4, 149.2, 135.9, 123.6, 120.8 (aromatic C), 46.4 ( $\text{ArCH}_2$ ), 38.7, 33.2, 26.5, 26.2 (cyclohexyl C).

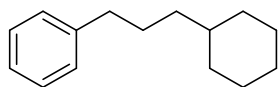

**(3-cyclohexylpropyl)benzene** (CAS: 170661-44-6).<sup>2</sup>

**3ab:** colorless oil. Yield: 59%. TLC:  $R_f = 0.70$  (*n*-hexane).

$^1\text{H}$  NMR (500 MHz,  $\text{CDCl}_3$ ):  $\delta$  7.30 – 7.26 (m, 2H), 7.22 – 7.11 (m, 3H), (aromatic CH), 2.58 (t,  $J = 7.8$  Hz, 2H) ( $\text{PhCH}_2$ ), 1.76 – 1.60 (m, 7H), 1.26 – 1.11 (m, 6H), 0.92 – 0.81 (m, 2H) ( $\text{PhCH}_2\text{CH}_2$ ,  $\text{CyCH}_2$  & cyclohexyl CH).

$^{13}\text{C}\{^1\text{H}\}$  NMR (126 MHz,  $\text{CDCl}_3$ ):  $\delta$  143.1, 128.5, 128.4, 125.7 (aromatic C), 37.7, 37.3, 36.4, 33.5, 29.0, 26.9, 26.6. ( $\text{CH}_2$  & cyclohexyl C).

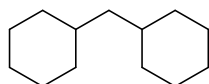

**Dicyclohexylmethane** (CAS: 3178-23-2).<sup>9</sup>

**3ac**: colorless oil. Yield: 30%. TLC:  $R_f = 0.80$  (*n*-hexane).

$^1\text{H}$  NMR (400 MHz,  $\text{CDCl}_3$ )  $\delta$  1.75 – 1.59 (m, 10H), 1.38 – 1.08 (m, 9H), 1.00 (t,  $J = 8.8$  Hz, 2H), 0.82 (qd,  $J = 12.8, 3.7$  Hz, 3H).

These data are identical to those reported in the literature.

#### Synthesis of 4.

An flame-dried V-shape reaction vial ( $10\text{ cm}^3$ ) equipped with a stir bar was charged with  $\text{Co}(\text{PPh}_3)_2\text{Cl}_2$  (26 mg, 0.04 mmol) and **L7** (19 mg, 0.04 mmol), followed by dry 1,4-dioxane (0.5 mL). The mixture was stirred at room temperature for 1 h, to which were successively added **2** (0.20 mmol), **1'** (0.4 mmol), potassium tert-butoxide (44.8 mg, 0.4 mmol) and dry 1,4-dioxane (0.5 mL). The vial was sealed with a rubber septum under an atmosphere of nitrogen, and then stirred at room temperature for 24 h. After the completion of the reaction, the solution was filtered in a short celite pad and washed with ethyl acetate ( $10\text{ mL} \times 3$ ). The solvent was removed under vacuum and the residue was purified by flash column chromatography to give the desired product **4**.

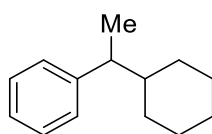

**(1-cyclohexylethyl)benzene** (CAS: 4413-16-5)<sup>10</sup>.



**4a:** colorless oil. Yield: 66%. TLC:  $R_f = 0.70$  (*n*-hexane).

$^1\text{H NMR}$  (400 MHz,  $\text{CDCl}_3$ ):  $\delta$  7.30 – 7.25 (m, 2H), 7.24 – 7.12 (m, 3H) (aromatic *CH*), 2.48 – 2.40 (m, 1H) (Ph*CH*), 1.92 – 1.84 (m, 1H), 1.77 – 1.71 (m, 1H), 1.68 – 1.56 (m, 2H), 1.48 – 1.33 (m, 2H), 1.26 – 1.20 (m, 4H), 1.15 – 1.01 (m, 2H), 0.99 – 0.88 (m, 1H), 0.87 – 0.75 (m, 1H) ( $\text{CH}_3$  & cyclohexyl *CH*).

$^{13}\text{C}\{^1\text{H}\}$  NMR (126 MHz,  $\text{CDCl}_3$ ):  $\delta$  147.3, 128.2, 127.9, 125.8 (aromatic C), 46.1 (Ph*CH*), 44.4, 31.6, 30.8, 26.7, 19.0 (cyclohexyl C &  $\text{CH}_3$ ).

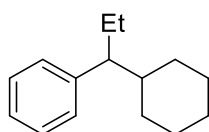

**4b:** colorless oil. Yield: 69% for iodide, 50% for bromide. TLC:  $R_f = 0.70$  (*n*-hexane).

$^1\text{H NMR}$  (500 MHz,  $\text{CDCl}_3$ ):  $\delta$  7.28 – 7.23 (m, 2H), 7.19 – 7.14 (m, 1H), 7.11 – 7.06 (m, 2H) (aromatic *CH*), 2.20 – 2.15 (m, 1H) (Ph*CH*), 1.91 – 1.86 (m, 1H), 1.86 – 1.78 (m, 1H), 1.75 – 1.68 (m, 1H), 1.64 – 1.55 (m, 2H), 1.56 – 1.49 (m, 1H), 1.49 – 1.37 (m, 2H), 1.28 – 1.16 (m, 1H), 1.16 – 1.01 (m, 2H), 0.94 – 0.86 (m, 1H), 0.80 – 0.71 (m, 1H) ( $\text{CH}_2\text{CH}_3$  & cyclohexyl *CH*), 0.68 (t,  $J = 7.3$  Hz, 3H) ( $\text{CH}_3$ ).

$^{13}\text{C}\{^1\text{H}\}$  NMR (126 MHz,  $\text{CDCl}_3$ ):  $\delta$  144.6, 128.7, 127.9, 125.6 (aromatic C), 54.2 (Ph*CH*), 43.0, 31.4, 31.1, 26.7, 26.6, 25.3, 12.4 (cyclohexyl C & ethyl C).

HRMS (APCI)  $m/z$ : calcd for  $\text{C}_{15}\text{H}_{21}^+$  [ $\text{M}-\text{H}$ ] $^+$ : 201.1638, found: 201.1643.

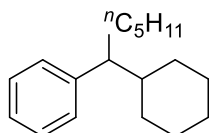

**4c:** colorless oil. Yield: 55%. TLC:  $R_f = 0.70$  (*n*-hexane).

$^1\text{H NMR}$  (400 MHz,  $\text{CDCl}_3$ ):  $\delta$  7.29 – 7.24 (m, 2H), 7.21 – 7.14 (m, 1H), 7.12 – 7.07 (m, 2H) (aromatic *CH*), 2.33 – 2.22 (m, 1H) (Ph*CH*), 1.95 – 1.84 (m, 1H), 1.84 – 1.68 (m, 2H), 1.69 – 1.50 (m, 3H), 1.50 – 1.36 (m, 2H), 1.33 – 1.12 (m, 6H), 1.11 – 1.01 (m, 3H), 0.96 – 0.86 (m, 1H), 0.86 – 0.71 (m, 4H) ( $\text{CH}_2$ ,  $\text{CH}_3$  & cyclohexyl *CH*).

$^{13}\text{C}\{^1\text{H}\}$  NMR (126 MHz,  $\text{CDCl}_3$ ):  $\delta$  145.1, 128.7, 128.0, 125.7 (aromatic C), 52.4

(PhCH), 43.5, 32.7, 32.2, 31.6, 31.2, 27.7, 26.7, 22.7, 14.2 (cyclohexyl C & n-pentyl C).

HRMS (APCI) m/z: calcd for C<sub>18</sub>H<sub>28</sub><sup>+</sup> [M<sup>+</sup>]: 244.2186, found: 244.2186.

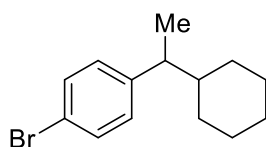

**4d**: colorless oil. Yield: 52%. TLC: R<sub>f</sub> = 0.70 (*n*-hexane).

<sup>1</sup>H NMR (400 MHz, CDCl<sub>3</sub>): δ 7.42 – 7.33 (m, 2H), 7.08 – 6.95 (m, 2H) (aromatic CH), 2.41 (p, *J* = 7.2 Hz, 1H) (ArCH), 1.89 – 1.81 (m, 1H), 1.77 – 1.69 (m, 1H), 1.67 – 1.57 (m, 2H), 1.45 – 1.38 (m, 1H), 1.38 – 1.30 (m, 1H), 1.29 – 1.21 (m, 1H), 1.20 (d, *J* = 7.0 Hz, 3H), 1.17 – 0.98 (m, 3H), 0.95 – 0.86 (m, 1H), 0.83 – 0.73 (m, 1H) (CHCH<sub>3</sub> & cyclohexyl CH).

<sup>13</sup>C{<sup>1</sup>H} NMR (101 MHz, CDCl<sub>3</sub>): δ 146.2, 131.2, 129.6, 119.4 (aromatic C), 45.6, 44.3, 31.5, 30.7, 26.6, 18.9 (ArCH, cyclohexyl C & CH<sub>3</sub>).

HRMS (APCI) m/z: calcd for C<sub>14</sub>H<sub>19</sub>Br<sup>+</sup> [M<sup>+</sup>]: 266.0665, found: 266.0665.

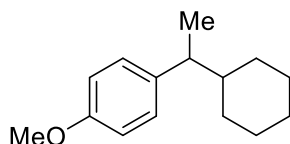

**4e**: colorless oil. Yield: 59%. TLC: R<sub>f</sub> = 0.7 (*n*-hexane : ethyl acetate = 10 : 1).

<sup>1</sup>H NMR (400 MHz, CDCl<sub>3</sub>): δ 7.10 – 6.99 (m, 2H), 6.87 – 6.78 (m, 2H) (aromatic CH), 3.79 (s, 3H) (OCH<sub>3</sub>), 2.40 (p, *J* = 7.2 Hz, 1H) (ArCH), 1.87 – 1.81 (m, 1H), 1.77 – 1.68 (m, 1H), 1.67 – 1.56 (m, 2H), 1.49 – 1.41 (m, 1H), 1.39 – 1.28 (m, 1H), 1.23 – 1.16 (m, 4H), 1.18 – 1.02 (m, 2H), 0.98 – 0.86 (m, 1H), 0.84 – 0.73 (m, 1H) (CHCH<sub>3</sub> & cyclohexyl CH).

<sup>13</sup>C{<sup>1</sup>H} NMR (126 MHz, CDCl<sub>3</sub>): δ 157.7, 139.3, 128.6, 113.5 (aromatic C), 55.4, 45.2, 44.5, 31.5, 30.8, 26.7, 19.1 (ArCH, cyclohexyl C & CH<sub>3</sub>).

HRMS (APCI) m/z: calcd for C<sub>15</sub>H<sub>23</sub>O<sup>+</sup> [M+H<sup>+</sup>]: 219.1743, found: 219.1742.

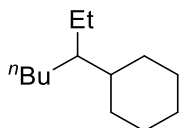

**heptan-3-ylcyclohexane** (CAS: 13456-14-9).<sup>11</sup>

**4f**: colorless oil. Yield: 35%. TLC:  $R_f = 0.70$  (*n*-hexane).

**<sup>1</sup>H NMR** (500 MHz, CDCl<sub>3</sub>):  $\delta$  1.76 – 1.68 (m, 2H), 1.67 – 1.61 (m, 1H), 1.59 – 1.55 (m, 2H), 1.36 – 1.23 (m, 6H), 1.23 – 1.07 (m, 6H), 1.05 – 0.93 (m, 3H) (*CH* & *CH*<sub>2</sub>), 0.89 (t,  $J = 7.1$  Hz, 3H), 0.84 (t,  $J = 7.4$  Hz, 3H) (*CH*<sub>3</sub>).

**<sup>13</sup>C{<sup>1</sup>H} NMR** (126 MHz, CDCl<sub>3</sub>):  $\delta$  45.1, 40.0 (*CH*), 30.3, 30.1, 30.0, 27.2, 27.1, 23.4, 23.3 (*CH*<sub>2</sub>), 14.3, 12.3 (*CH*<sub>3</sub>).

HRMS (APCI) *m/z*: calcd for C<sub>13</sub>H<sub>25</sub><sup>+</sup> [*M*-H]<sup>+</sup>: 181.1951, found: 181.1951.

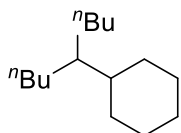

**nonan-5-ylcyclohexane** (CAS: 131284-82-7).<sup>12</sup>

**4g**: colorless oil. Yield: 37%. TLC:  $R_f = 0.70$  (*n*-hexane).

**<sup>1</sup>H NMR** (500 MHz, CDCl<sub>3</sub>):  $\delta$  1.72 (dt,  $J = 12.2, 3.1$  Hz, 2H), 1.68 – 1.61 (m, 1H), 1.58 – 1.53 (m, 2H), 1.35 – 1.17 (m, 13H), 1.17 – 1.09 (m, 3H), 1.05 – 0.95 (m, 3H) (*CH* & *CH*<sub>2</sub>), 0.89 (t,  $J = 7.0$  Hz, 6H) (*CH*<sub>3</sub>).

**<sup>13</sup>C{<sup>1</sup>H} NMR** (126 MHz, CDCl<sub>3</sub>):  $\delta$  43.4, 40.4 (*CH*), 30.7, 30.3, 30.0, 27.2, 23.4 (*CH*<sub>2</sub>), 14.3 (*CH*<sub>3</sub>).

HRMS (APCI) *m/z*: calcd for C<sub>15</sub>H<sub>29</sub><sup>+</sup> [*M*-H]<sup>+</sup>: 209.2264, found: 209.2266.

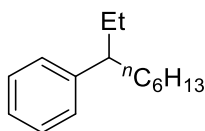

**nonan-3-ylbenzene** (CAS: 20216-87-9).<sup>13</sup>

**4h**: colorless oil. Yield: 30% for iodide, 15% for bromide. TLC:  $R_f = 0.70$  (*n*-hexane).

**<sup>1</sup>H NMR** (400 MHz, CDCl<sub>3</sub>):  $\delta$  7.31 – 7.26 (m, 2H), 7.19 – 7.11 (m, 3H) (aromatic)

*CH*), 2.42 – 2.34 (m, 1H) (*CH*), 1.67 – 1.52 (m, 4H), 1.29 – 1.11 (m, 8H) (*CH*<sub>2</sub>), 0.84 (t, *J* = 7.0 Hz, 3H), 0.76 (t, *J* = 7.4 Hz, 3H) (*CH*<sub>3</sub>).

<sup>13</sup>C{<sup>1</sup>H} NMR (101 MHz, CDCl<sub>3</sub>): δ 146.3, 128.3, 127.9, 125.8 (aromatic C), 48.0 (PhCH), 36.7, 31.9, 29.9, 29.6, 27.8, 22.8, 14.2, 12.4 (*CH*<sub>2</sub> & *CH*<sub>3</sub>).

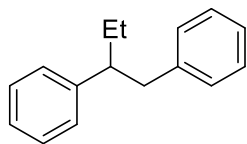

**butane-1,2-diyl**dibenzene (CAS: 5223-59-6 ).<sup>14</sup>

**4i**: colorless oil. Yield: 47% for bromide, 40% for chloride. TLC: *R*<sub>f</sub> = 0.65 (*n*-hexane).

<sup>1</sup>H NMR (500 MHz, CDCl<sub>3</sub>) δ 7.33 – 7.26 (m, 2H), 7.26 – 7.11 (m, 6H), 7.10 – 7.00 (m, 2H) (aromatic *CH*), 2.97 – 2.88 (m, 2H), 2.78 – 2.70 (m, 1H) (Ph*CH* & Ph*CH*<sub>2</sub>), 1.83 – 1.70 (m, 1H), 1.70 – 1.59 (m, 1H) (*CH*<sub>2</sub>*CH*<sub>3</sub>), 0.79 (t, *J* = 7.4 Hz, 3H) (*CH*<sub>3</sub>).

<sup>13</sup>C{<sup>1</sup>H} NMR (126 MHz, CDCl<sub>3</sub>): δ 145.2, 141.0, 129.3, 128.3, 128.2, 128.0, 126.1, 125.9 (aromatic C), 49.94, 43.63 (Ph*CH* & Ph*CH*<sub>2</sub>), 28.4 (*CH*<sub>2</sub>), 12.3 (*CH*<sub>3</sub>).

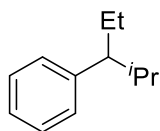

**(2-methylpentan-3-yl)**benzene (CAS: 19219-86-4).<sup>15</sup>

**4j**: colorless oil. Yield: 57% for iodide, 45% for bromide. TLC: *R*<sub>f</sub> = 0.70 (*n*-hexane).

<sup>1</sup>H NMR (400 MHz, CDCl<sub>3</sub>): δ 7.29 – 7.25 (m, 2H), 7.18 (tt, *J* = 7.2 Hz, 1.2 Hz, 1H), 7.12 – 7.09 (m, 2H) (aromatic *CH*), 2.18 – 2.12 (m, 1H) (Ph*CH*), 1.89 – 1.75 (m, 2H) (*CH*<sub>2</sub>), 1.61 – 1.50 (m, 1H) (*CH*(*CH*<sub>3</sub>)<sub>2</sub>), 0.95 (d, *J* = 6.6 Hz, 3H) (*CH*(*CH*<sub>3</sub>)<sub>2</sub>), 0.71 (t, *J* = 6.8 Hz, 6H) (*CH*<sub>2</sub>*CH*<sub>3</sub>).

<sup>13</sup>C{<sup>1</sup>H} NMR (101 MHz, CDCl<sub>3</sub>): δ 144.7, 128.8, 128.0, 125.8 (aromatic C), 55.2 (Ph*CH*) 33.3, 25.9, 21.2, 20.9, 12.6 (*CH*(*CH*<sub>3</sub>)<sub>2</sub>, *CH*<sub>2</sub> & *CH*<sub>3</sub>).

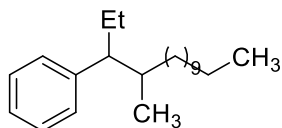

**4k**: 70% nmr yield. **4k** was mixed with by-products tridecane and tridec-2-ene, which cannot be purified by column chromatography. The NMR spectra were not pure.

$^1\text{H}$  NMR (500 MHz,  $\text{CDCl}_3$ )  $\delta$  7.30 – 7.23 (m, 2H), 7.24 – 7.13 (m, 1H), 7.14 – 7.07 (m, 2H) (aromatic *CH*), 2.36 – 2.24 (m, 1H) (*PhCH*), 1.83 – 1.74 (m, 1H) (*PhCHCH*), 1.69 – 1.56 (m, 2H), 1.29 – 1.22 (m, 20H) ( $\text{CH}_2$ ), 0.92 – 0.85 (m, 6H), 0.70 (t,  $J = 10.8$  Hz, 3H) ( $\text{CH}_3$ ).  $^{13}\text{C}$  NMR spectrum is not pure.

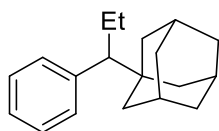

1-(1-phenylpropyl)adamantane (CAS: 116137-28-1).<sup>16</sup>

**4l**: colorless oil. Yield: 60%. TLC:  $R_f = 0.70$  (*n*-hexane).

$^1\text{H}$  NMR (500 MHz,  $\text{CDCl}_3$ ):  $\delta$  7.26 – 7.23 (m, 2H), 7.21 – 7.16 (m, 1H), 7.09 (d,  $J = 6.8$  Hz, 2H) (aromatic *CH*), 2.03 (dd,  $J = 12.1, 3.2$  Hz, 1H) (*PhCH*), 1.93 – 1.88 (m, 3H), 1.88 – 1.80 (m, 1H), 1.69 – 1.58 (m, 8H), 1.54 – 1.58 (m, 2H), 1.36 (m, 3H) ( $\text{CH}_2$  & *CH*), 0.64 (t,  $J = 7.3$  Hz, 3H) ( $\text{CH}_3$ ).

$^{13}\text{C}\{^1\text{H}\}$  NMR (126 MHz,  $\text{CDCl}_3$ ):  $\delta$  142.3, 127.5, 125.8 (aromatic *C*), 60.2 (*PhCH*), 40.7, 37.3, 35.7, 29.0, 20.5, 13.4 (ethyl & adamantyl *C*).

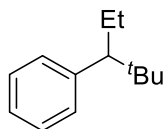

(2,2-dimethylpentan-3-yl)benzene (CAS: 89675-53-6).<sup>17</sup>

**4m**: colorless oil. Yield: 35% for iodide, 51% for bromide. TLC:  $R_f = 0.70$  (*n*-hexane).

$^1\text{H}$  NMR (500 MHz,  $\text{CDCl}_3$ ):  $\delta$  7.27 – 7.24 (s, 1H), 7.21 – 7.15 (m, 1H), 7.13 (d,  $J = 6.7$  Hz, 2H) (aromatic *CH*), 2.21 (dd,  $J = 12.1, 3.1$  Hz, 1H) (*PhCH*), 1.87 – 1.79 (m, 1H), 1.70 – 1.62 (m, 1H) ( $\text{CH}_2$ ), 0.86 (s, 9H) ( $\text{C}(\text{CH}_3)_3$ ), 0.67 (t,  $J = 7.2$  Hz, 3H)

(CH<sub>2</sub>CH<sub>3</sub>).

<sup>13</sup>C{<sup>1</sup>H} NMR (126 MHz, CDCl<sub>3</sub>): δ 143.1, 127.6, 125.9 (aromatic C), 59.1 (PhCH), 34.0, 28.5, 22.7, 13.4 (C(CH<sub>3</sub>)<sub>3</sub>, CH<sub>2</sub> & CH<sub>3</sub>).

### Mechanistic studies.

### Control experiments.

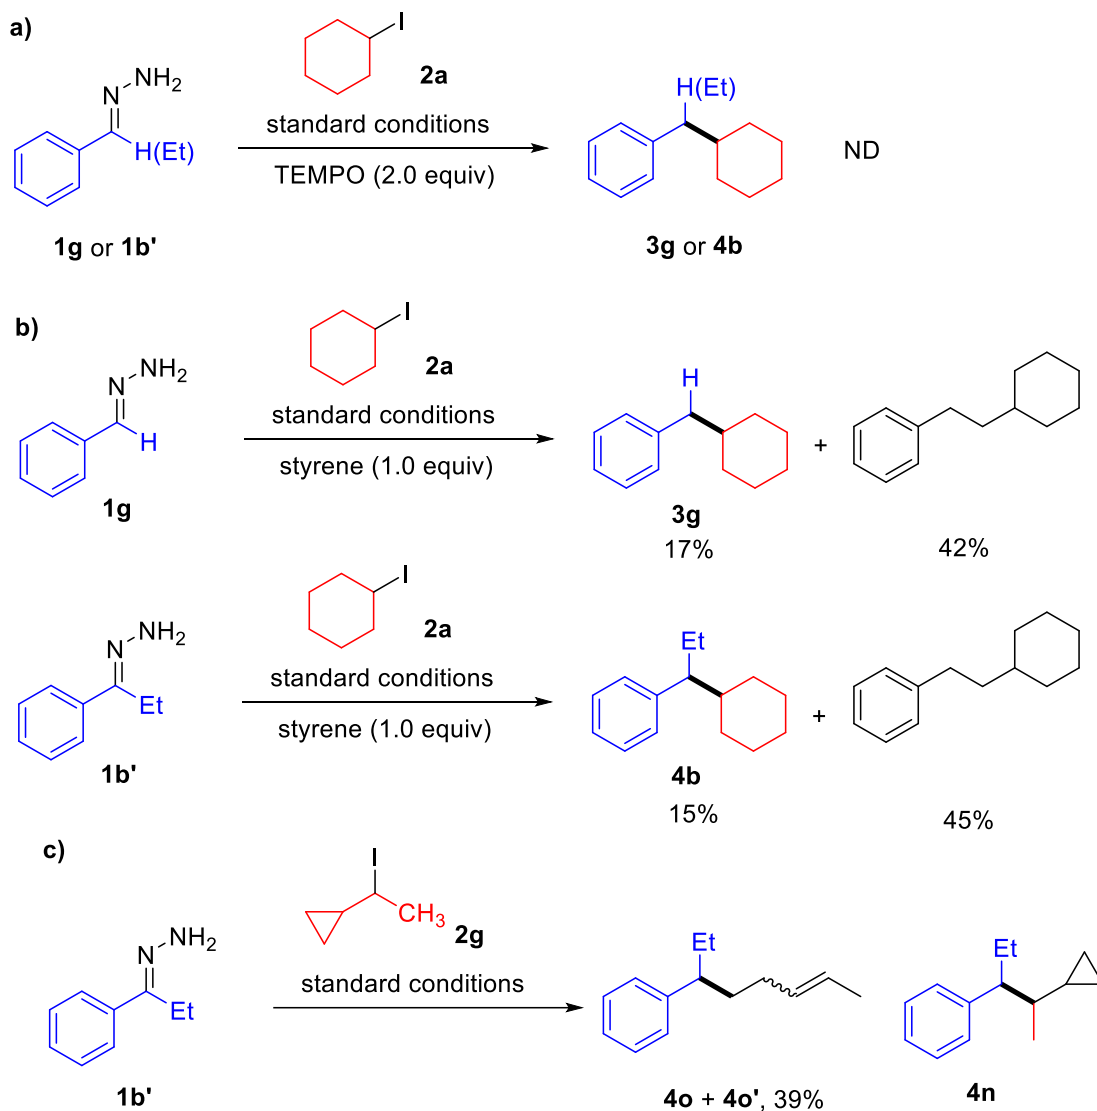

**Scheme S1** Control Experiments

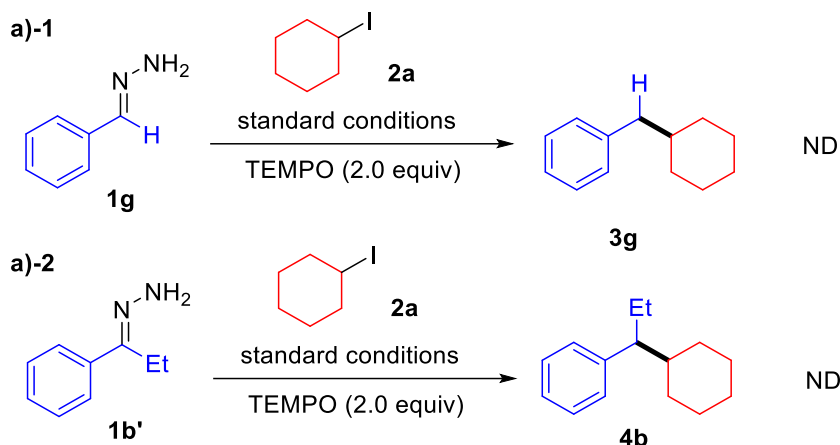

A flame-dried V-shape reaction vial (10 cm<sup>3</sup>) equipped with a stir bar was charged with CoCl<sub>2</sub> (5.2 mg, 0.04 mmol) and **L5** (120 mg, 10%wt in THF, 0.04 mmol) or Co(PPh<sub>3</sub>)<sub>2</sub>Cl<sub>2</sub> (26 mg, 0.04 mmol) and **L7** (19 mg, 0.04 mmol), followed by dry 1,4-dioxane (0.5 mL). The mixture was stirred at room temperature for 1 h, to which were successively added **2a** (42 mg, 0.20 mmol), **1g** (48 mg, 0.4 mmol) or **1b'** (60 mg, 0.4 mmol), potassium tert-butoxide (44.8 mg, 0.4 mmol), TEMPO (2,2,6,6-tetramethyl-1-piperidinyloxy, 62 mg, 0.4 mmol) and dry 1,4-dioxane (0.5 mL). The vial was sealed with a rubber septum under an atmosphere of nitrogen, and then stirred at room temperature for 24 h. No desired cross-coupling product was detected either for **1g** or **1b'** after reaction.

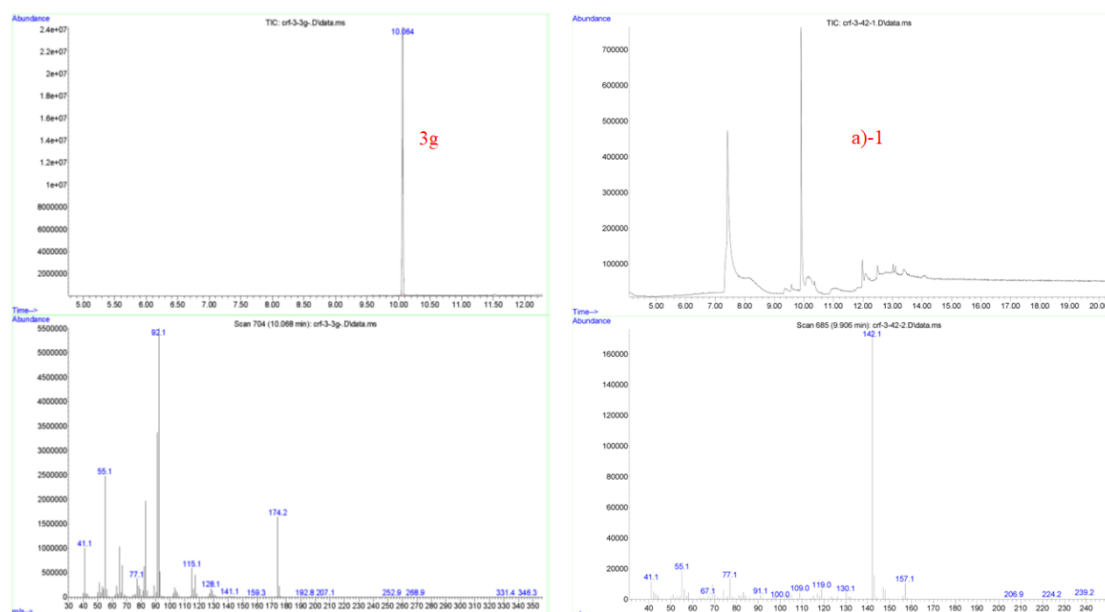

**Figure S1** GC-MS results of pure **3g** (left) and experiment Scheme S1 a)-1 (right).

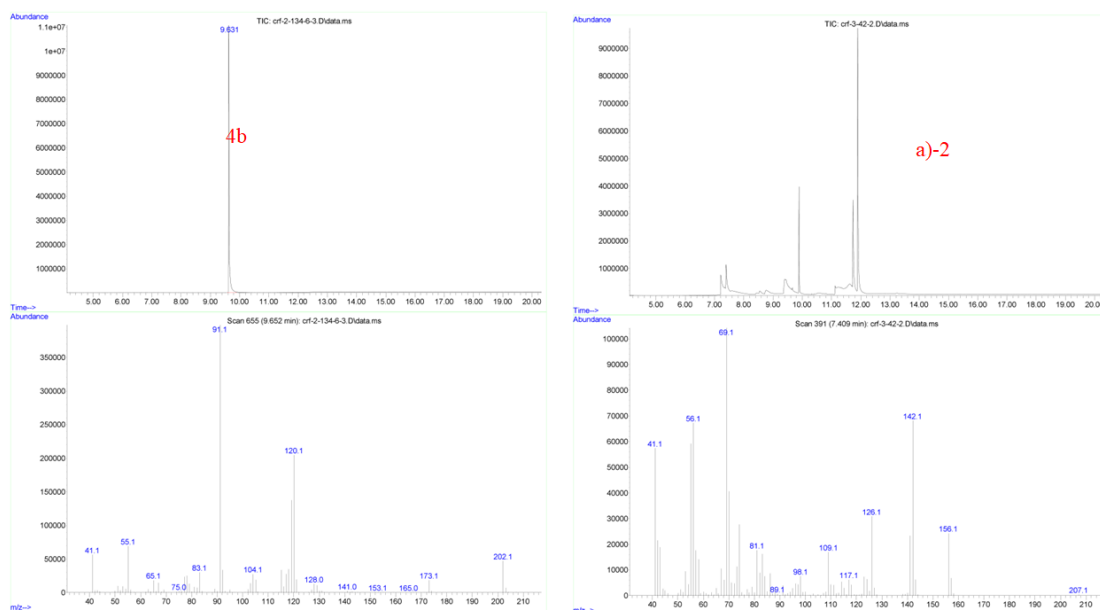

**Figure S2** GC-MS results of pure **4b** (left) and experiment Scheme S1 a)-2 (right).

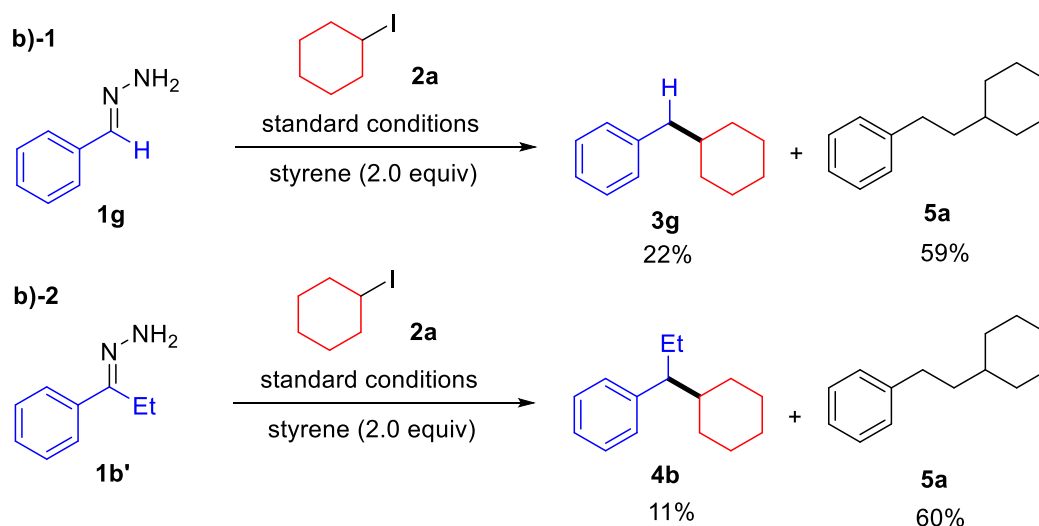

A flame-dried V-shape reaction vial (10 cm<sup>3</sup>) equipped with a stir bar was charged with CoCl<sub>2</sub> (5.2 mg, 0.04 mmol) and **L5** (120 mg, 10%wt in THF, 0.04 mmol) or Co(PPh<sub>3</sub>)<sub>2</sub>Cl<sub>2</sub> (26 mg, 0.04 mmol) and **L7** (19 mg, 0.04 mmol), followed by dry 1,4-dioxane (0.5 mL). The mixture was stirred at room temperature for 1 h, to which were successively added **2a** (42 mg, 0.20 mmol), **1g** (48 mg, 0.4 mmol) or **1b'** (60 mg, 0.4 mmol), potassium tert-butoxide (44.8 mg, 0.4 mmol), styrene (40 mg, 0.4 mmol) and dry 1,4-dioxane (0.5 mL). The vial was sealed with a rubber septum under an atmosphere of nitrogen, and then stirred at room temperature for 24 h. After completion of the reaction, the solution was filtered in a short celite pad and washed



with ethyl acetate (10 mL × 3). The reaction was monitored by GC-MS using 1,3,5-trimethoxybenzene (0.1 mmol) as internal standard.

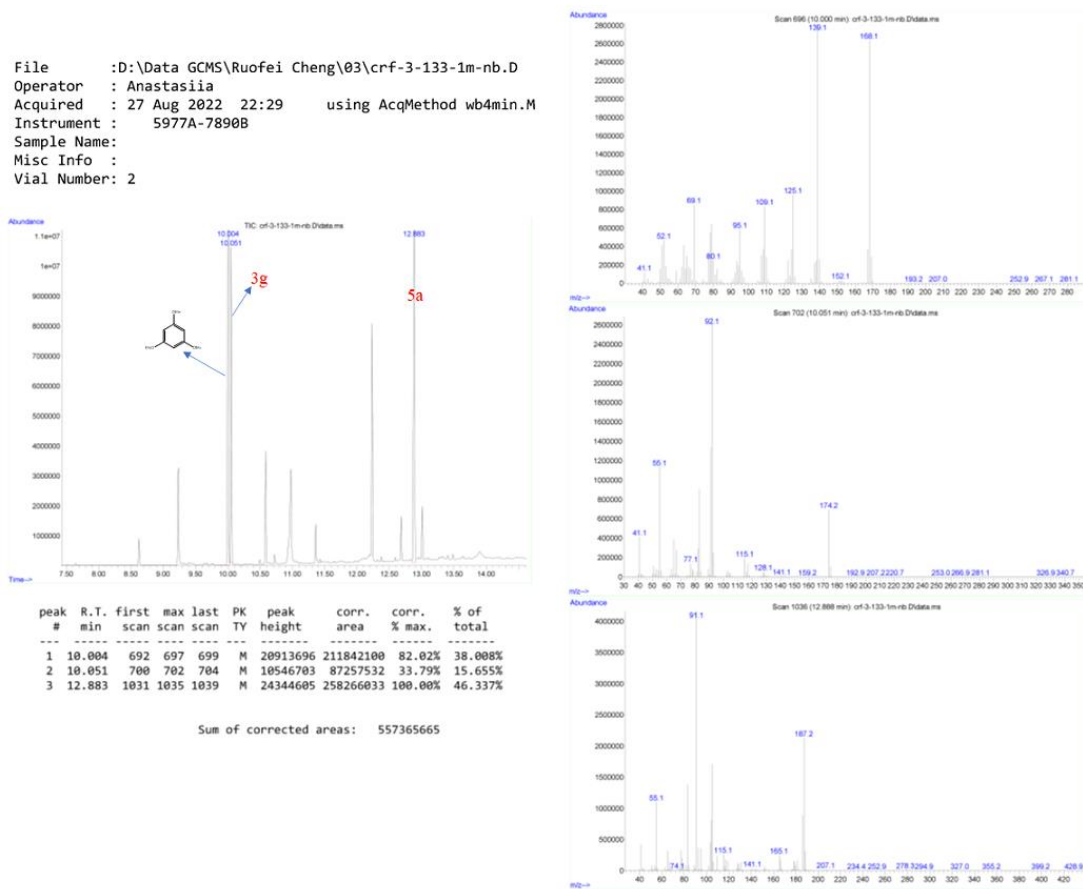

Figure S3 GC-MS result of experiment Scheme S1 b)-1.

File :D:\Data GCMS\Ruofei Cheng\03\crf-3-133-2m-nb.D  
 Operator : Anastasiia  
 Acquired : 27 Aug 2022 22:53 using AcqMethod wb4min.M  
 Instrument : 5977A-7890B  
 Sample Name :  
 Misc Info :  
 Vial Number: 3

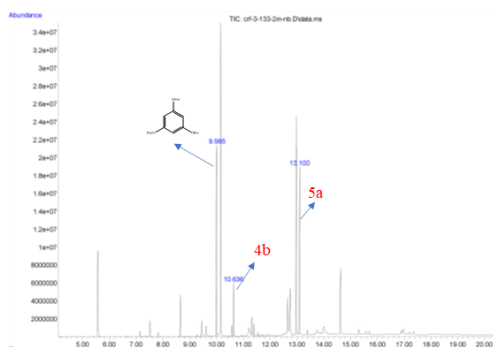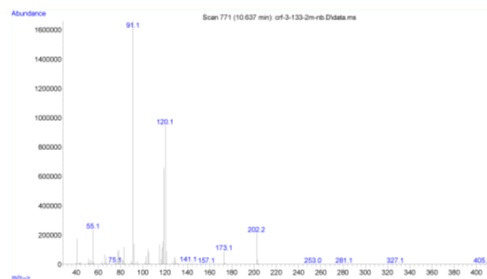

| peak # | R.T. min | first scan | max scan | last scan | PK TY | peak height | corr. area | corr. % max. | % of total |
|--------|----------|------------|----------|-----------|-------|-------------|------------|--------------|------------|
| 1      | 9.995    | 692        | 695      | 700       | M     | 23209851    | 238586259  | 82.83%       | 41.192%    |
| 2      | 10.636   | 765        | 771      | 776       | M     | 6062301     | 52572725   | 18.25%       | 9.077%     |
| 3      | 13.100   | 1056       | 1061     | 1064      | M     | 18819539    | 288052721  | 100.00%      | 49.732%    |

Sum of corrected areas: 579211705

**Figure S4** GC-MS result of experiment Scheme S1 b)-2.

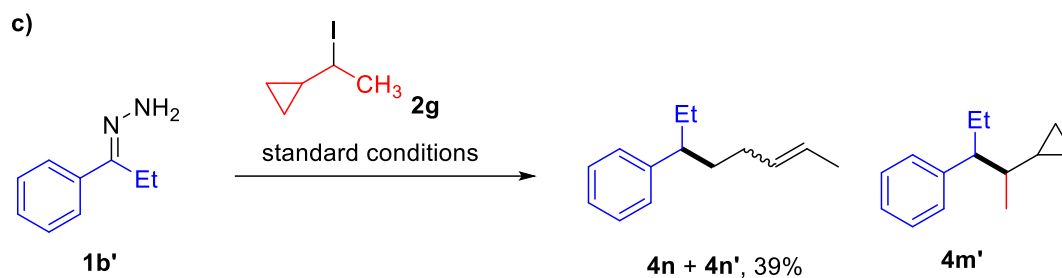

A flame-dried V-shape reaction vial (10 cm<sup>3</sup>) equipped with a stir bar was charged with Co(PPh<sub>3</sub>)<sub>2</sub>Cl<sub>2</sub> (26 mg, 0.04 mmol) and **L7** (19 mg, 0.04 mmol), followed by dry 1,4-dioxane (0.5 mL). The mixture was stirred at room temperature for 1 h, to which were successively added **2g** (40 mg, 0.20 mmol), **1b'** (60 mg, 0.4 mmol), potassium tert-butoxide (44.8 mg, 0.4 mmol), and dry 1,4-dioxane (0.5 mL). The vial was sealed with a rubber septum under an atmosphere of nitrogen, and then stirred at room temperature for 24 h. The solvent was removed under vacuum and the residue was purified by flash column chromatography to give a mixture of **4n** and **4n'** as coreless oil (15 mg, 39%)

**4n** and **4n'**: TLC: R<sub>f</sub> = 0.70 (*n*-hexane) (<sup>1</sup>H NMR spectrum is not pure).

**<sup>1</sup>H NMR** (500 MHz, CDCl<sub>3</sub>): δ 7.30 – 7.27 (m, 1H), 7.20 – 7.15 (m, 1H), 7.15 – 7.09 (m, 2H) (aromatic CH), 5.50 – 5.23 (m, 2H) (alkenyl CH), 2.46 – 2.35 (m, 1H) (PhCH), 1.89 – 1.77 (m, 2H), 1.71 – 1.64 (m, 2H) (PhCHCH<sub>2</sub>), 1.62 (d, *J* = 4.8 Hz, 3H) (CH=CHCH<sub>3</sub>), 0.91 – 0.86 (m, 2H) (CH<sub>2</sub>CH=CH), 0.76 (t, *J* = 7.4 Hz, 3H) (CH<sub>2</sub>CH<sub>3</sub>).

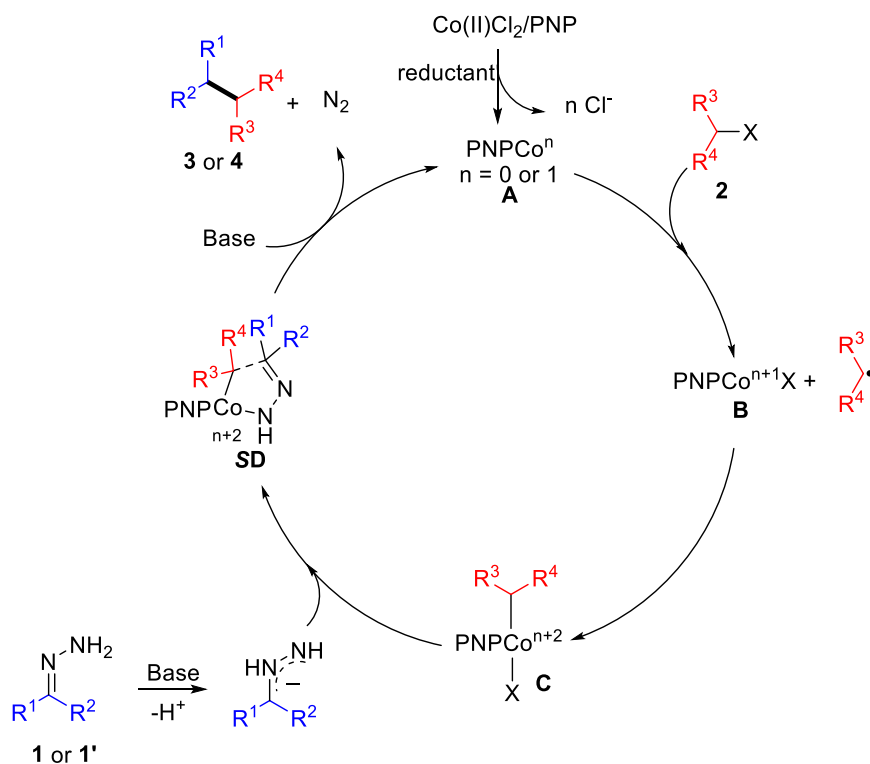

**Scheme S2** Proposed reaction mechanism

# NMR spectra of products

## Figure S5 <sup>1</sup>H NMR of 3a

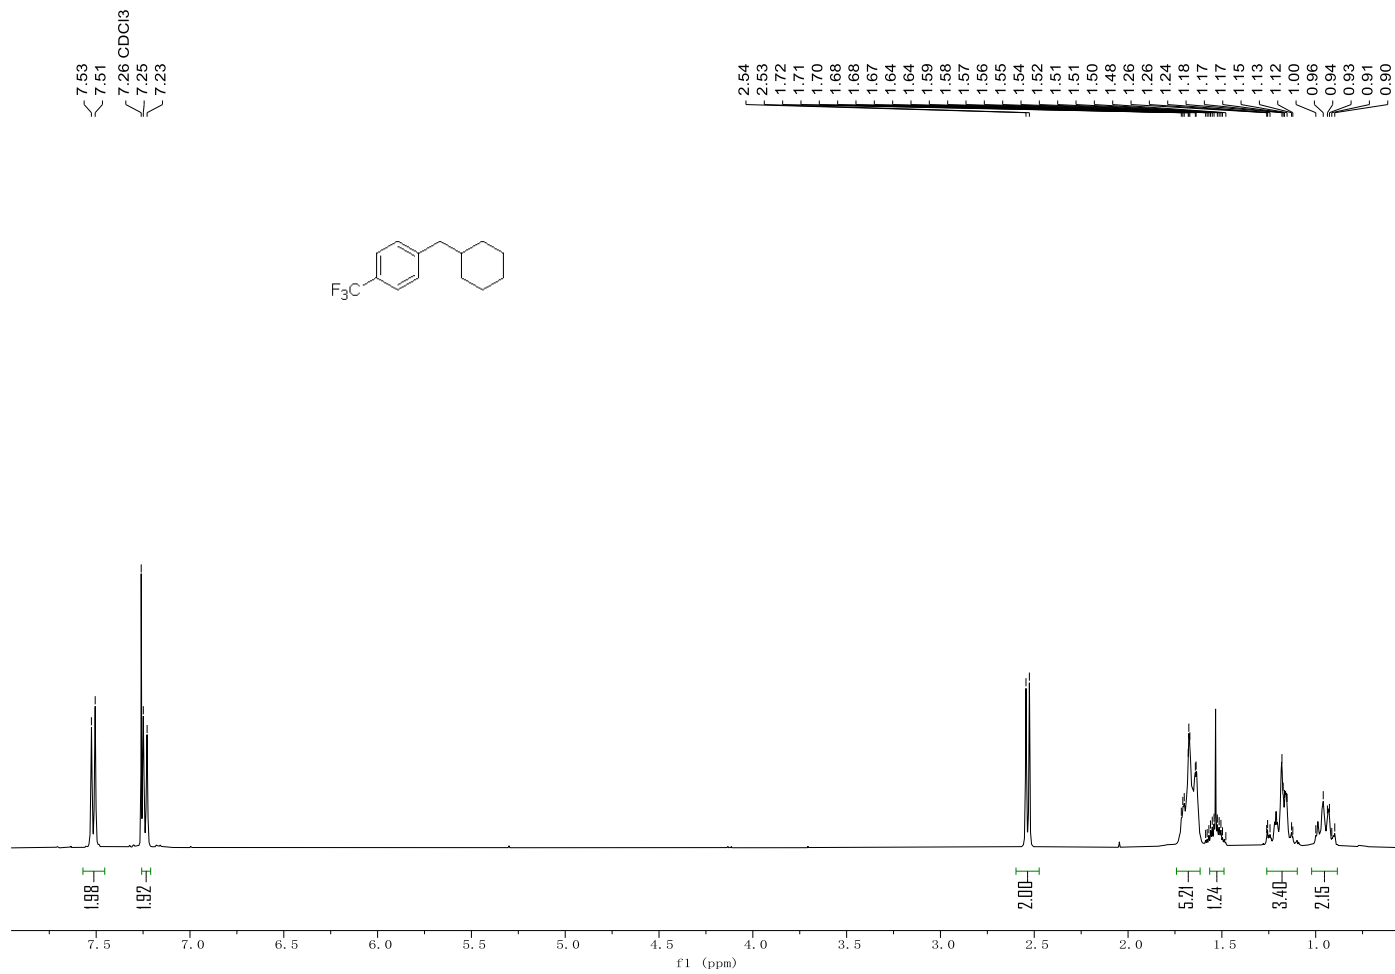

Figure S6  $^{13}\text{C}$  NMR of 3a

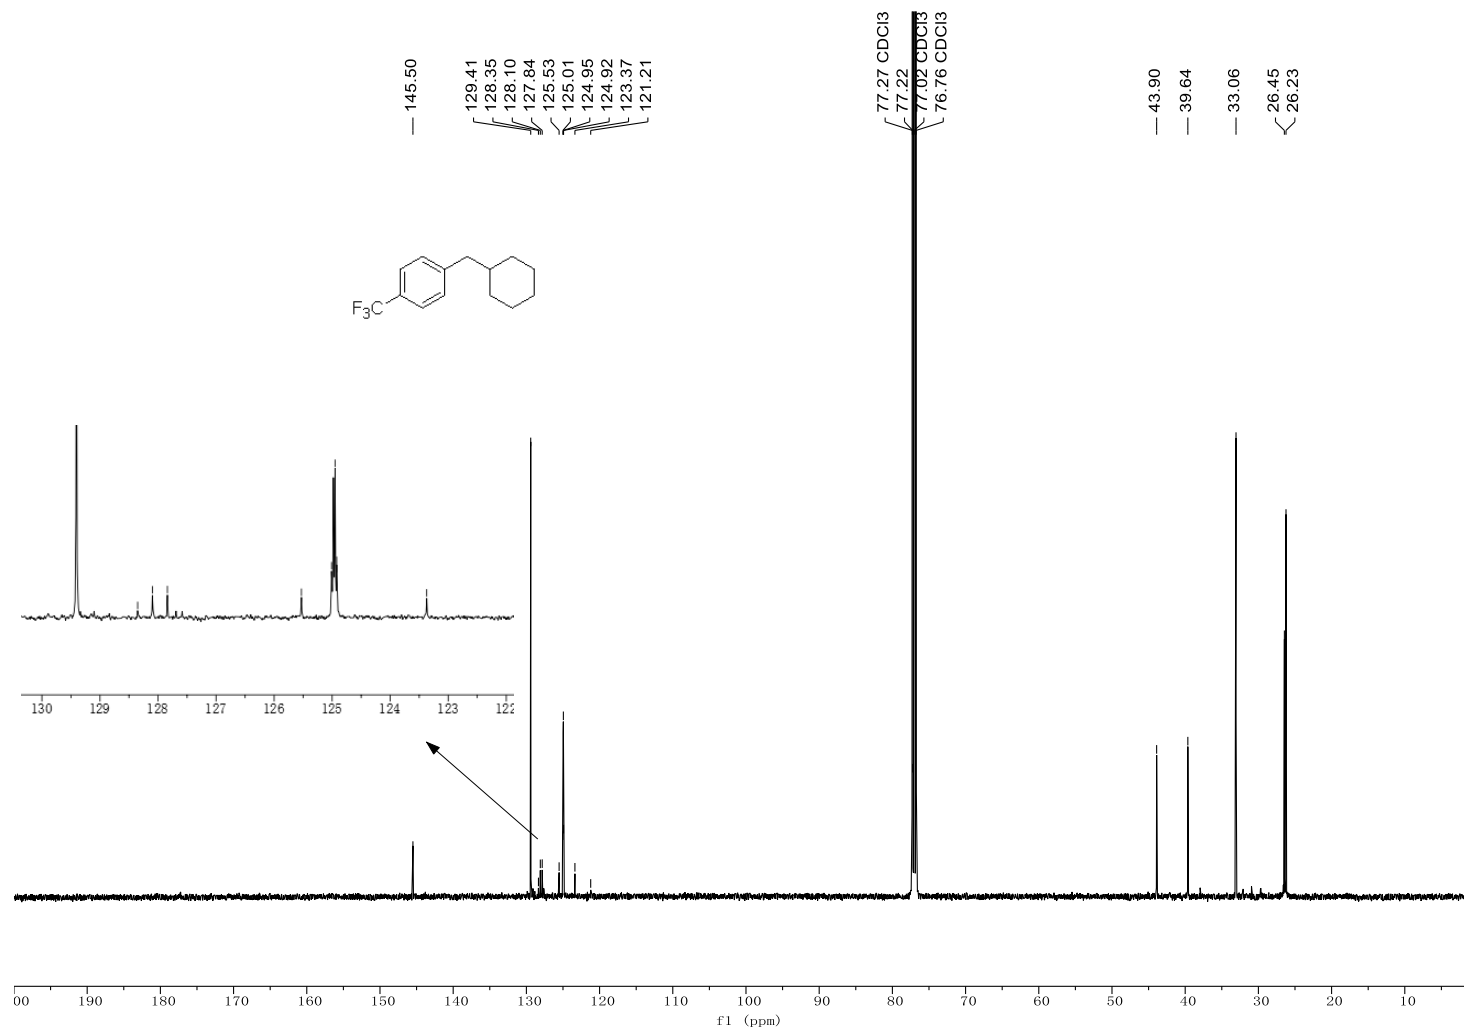

Figure S7  $^{19}\text{F}$  NMR of 3a

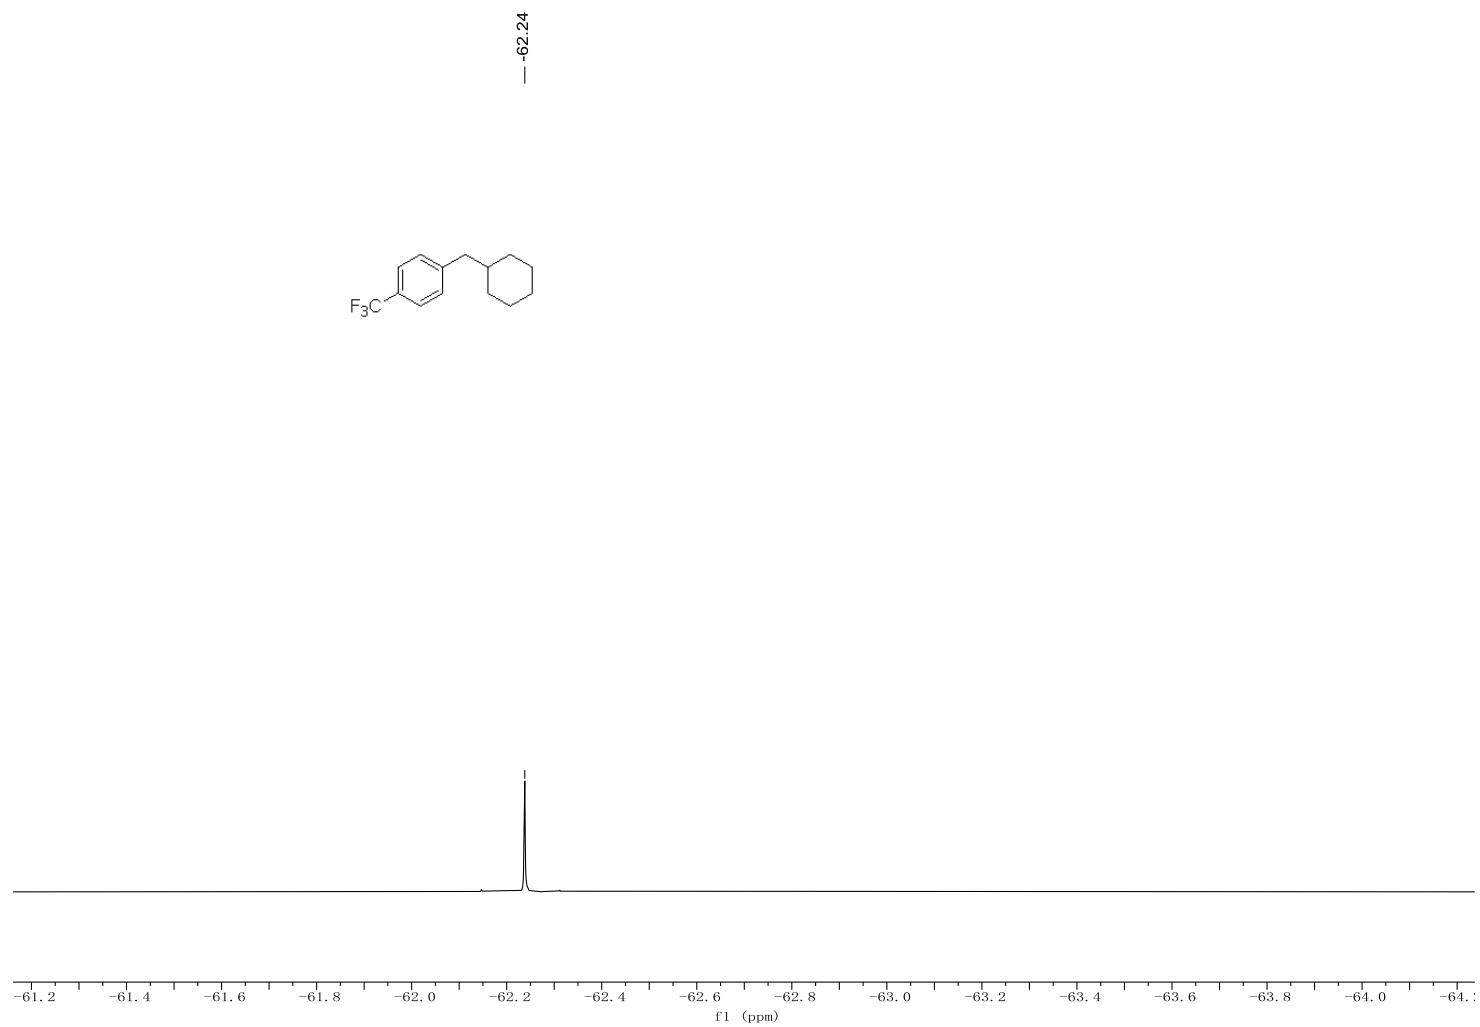

Figure S8  $^1\text{H}$  NMR of 3b

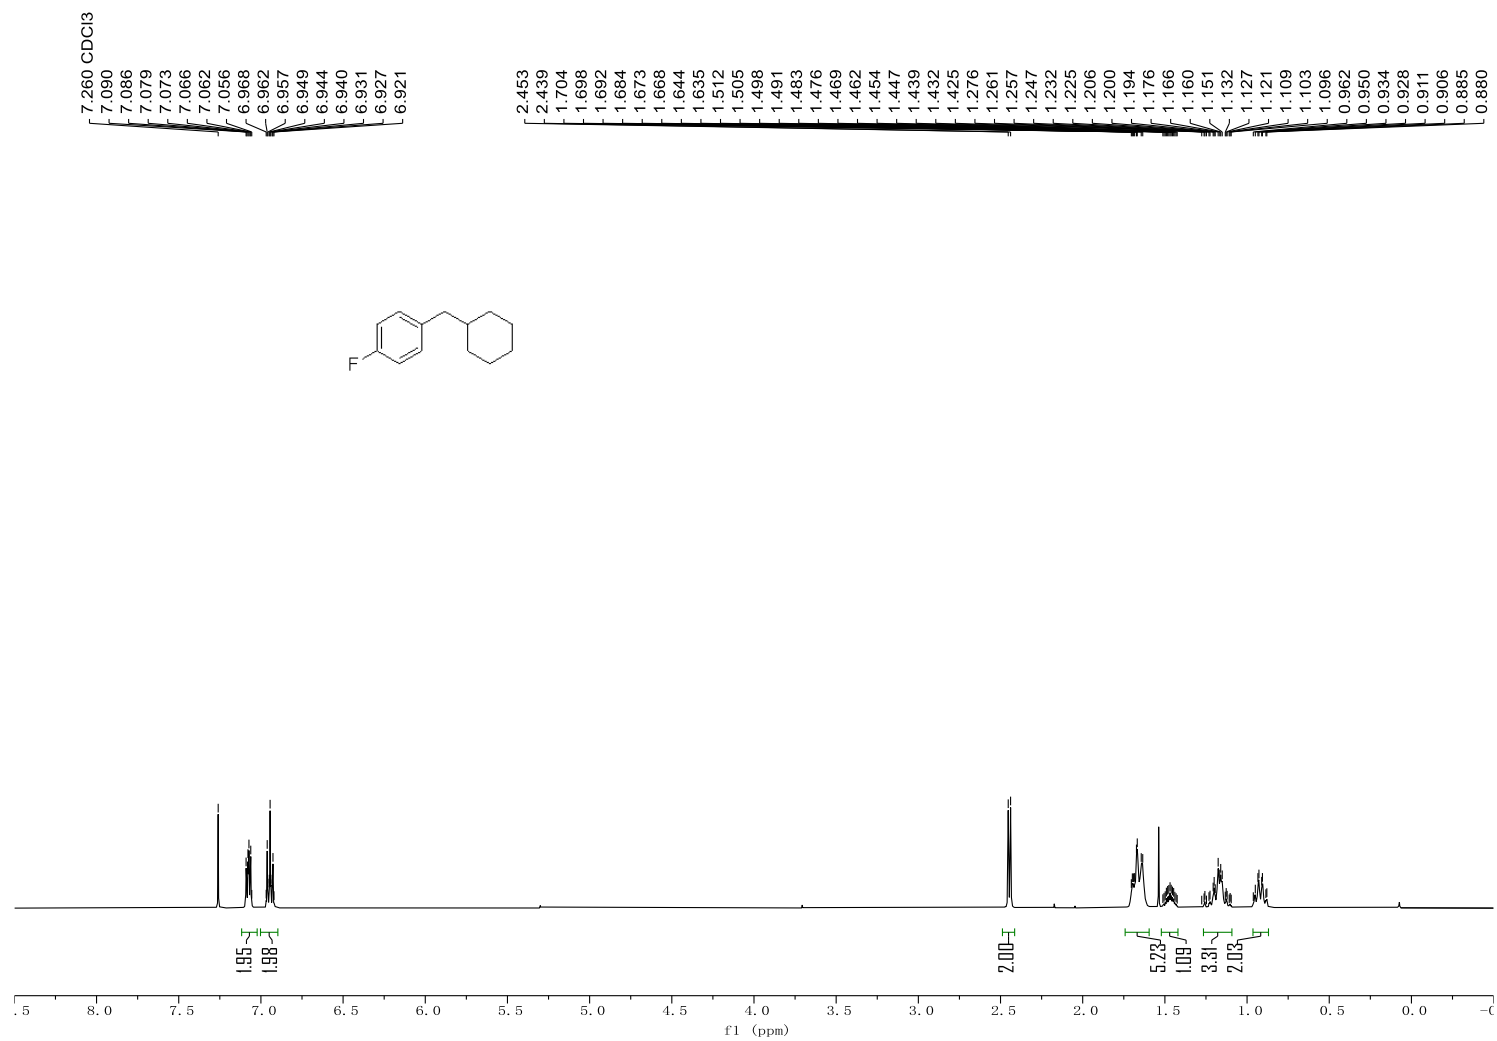

Figure S9  $^{13}\text{C}$  NMR of 3b

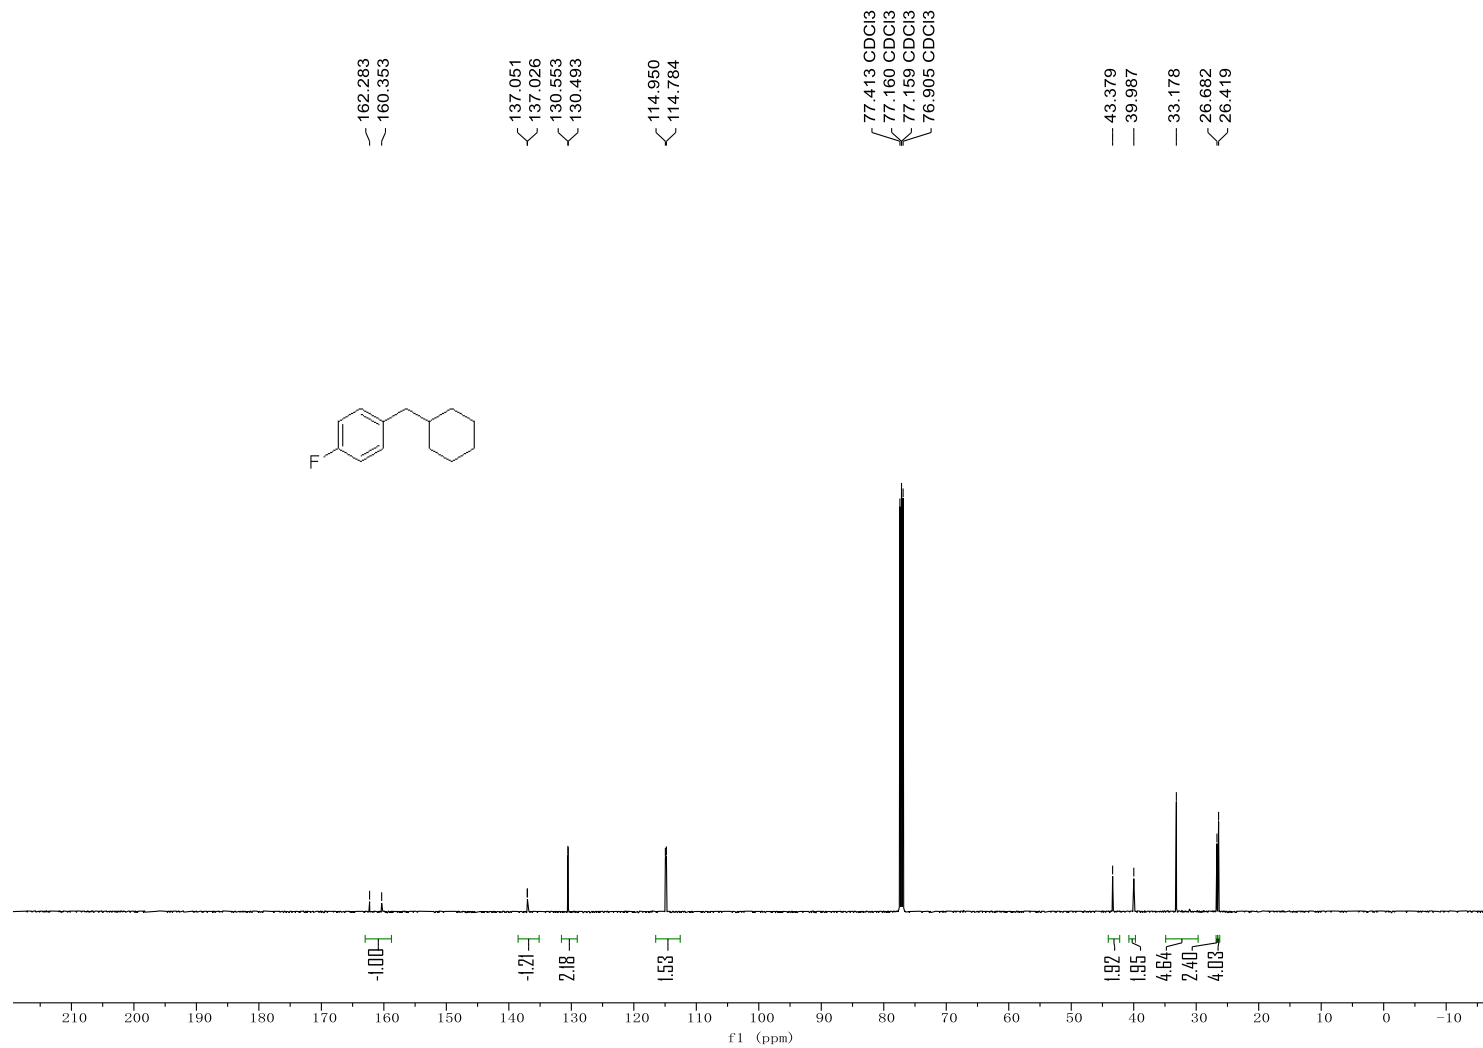



**Figure S10**  $^{19}\text{F}$  NMR of **3b**

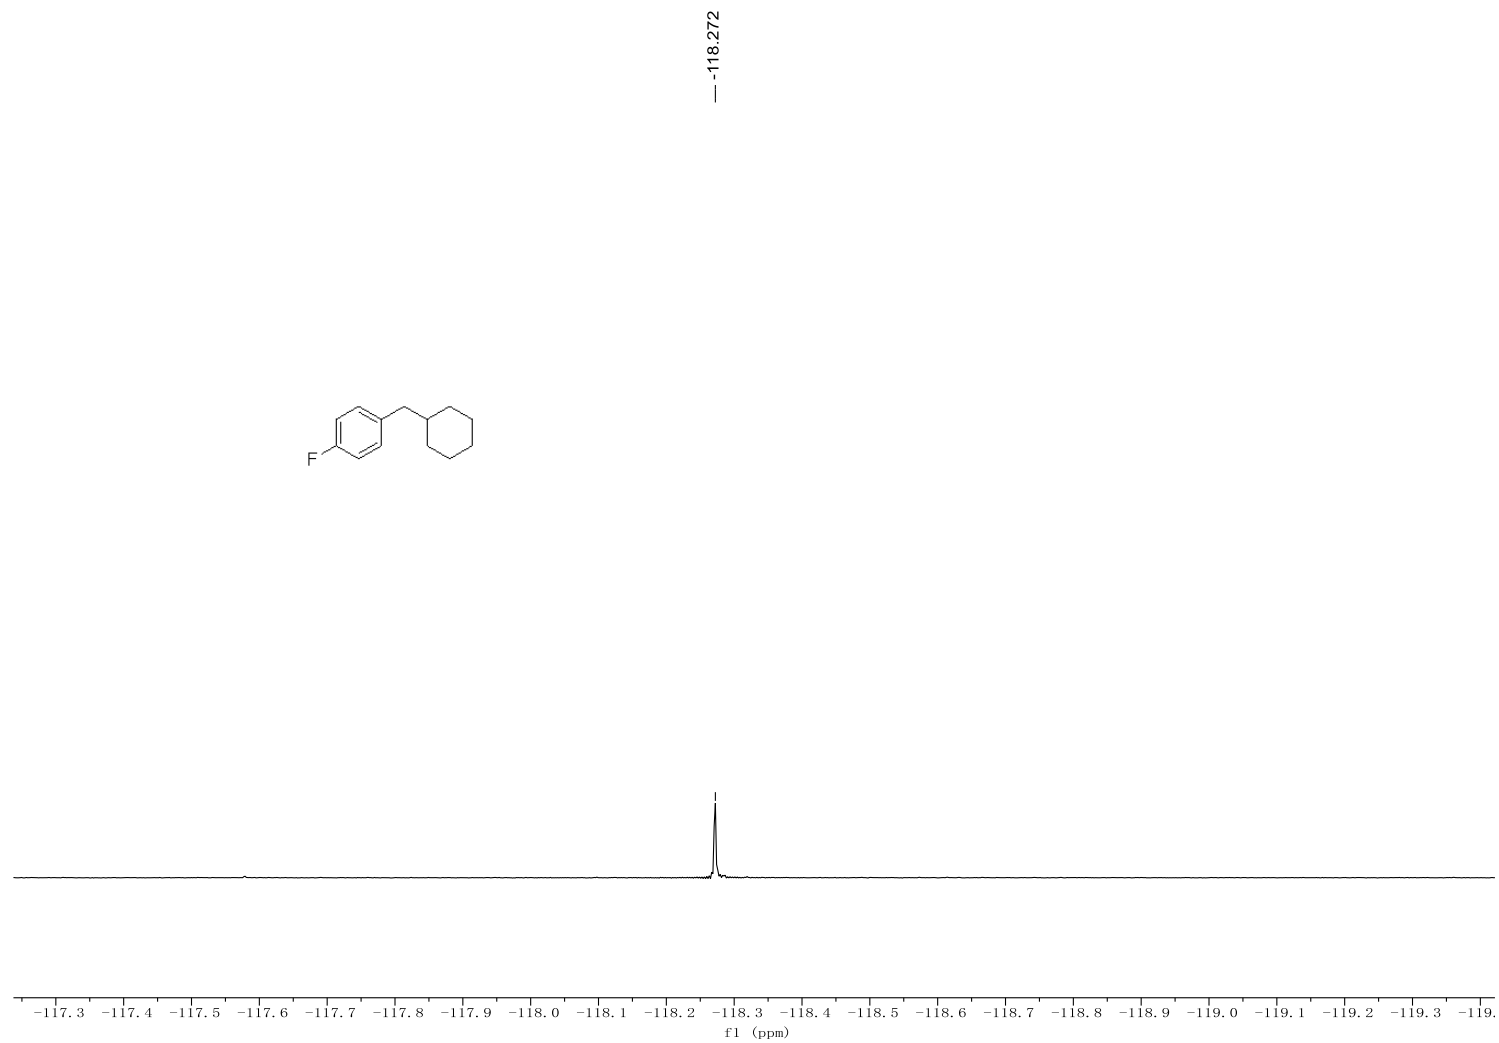

Figure S11 <sup>1</sup>H NMR of 3c

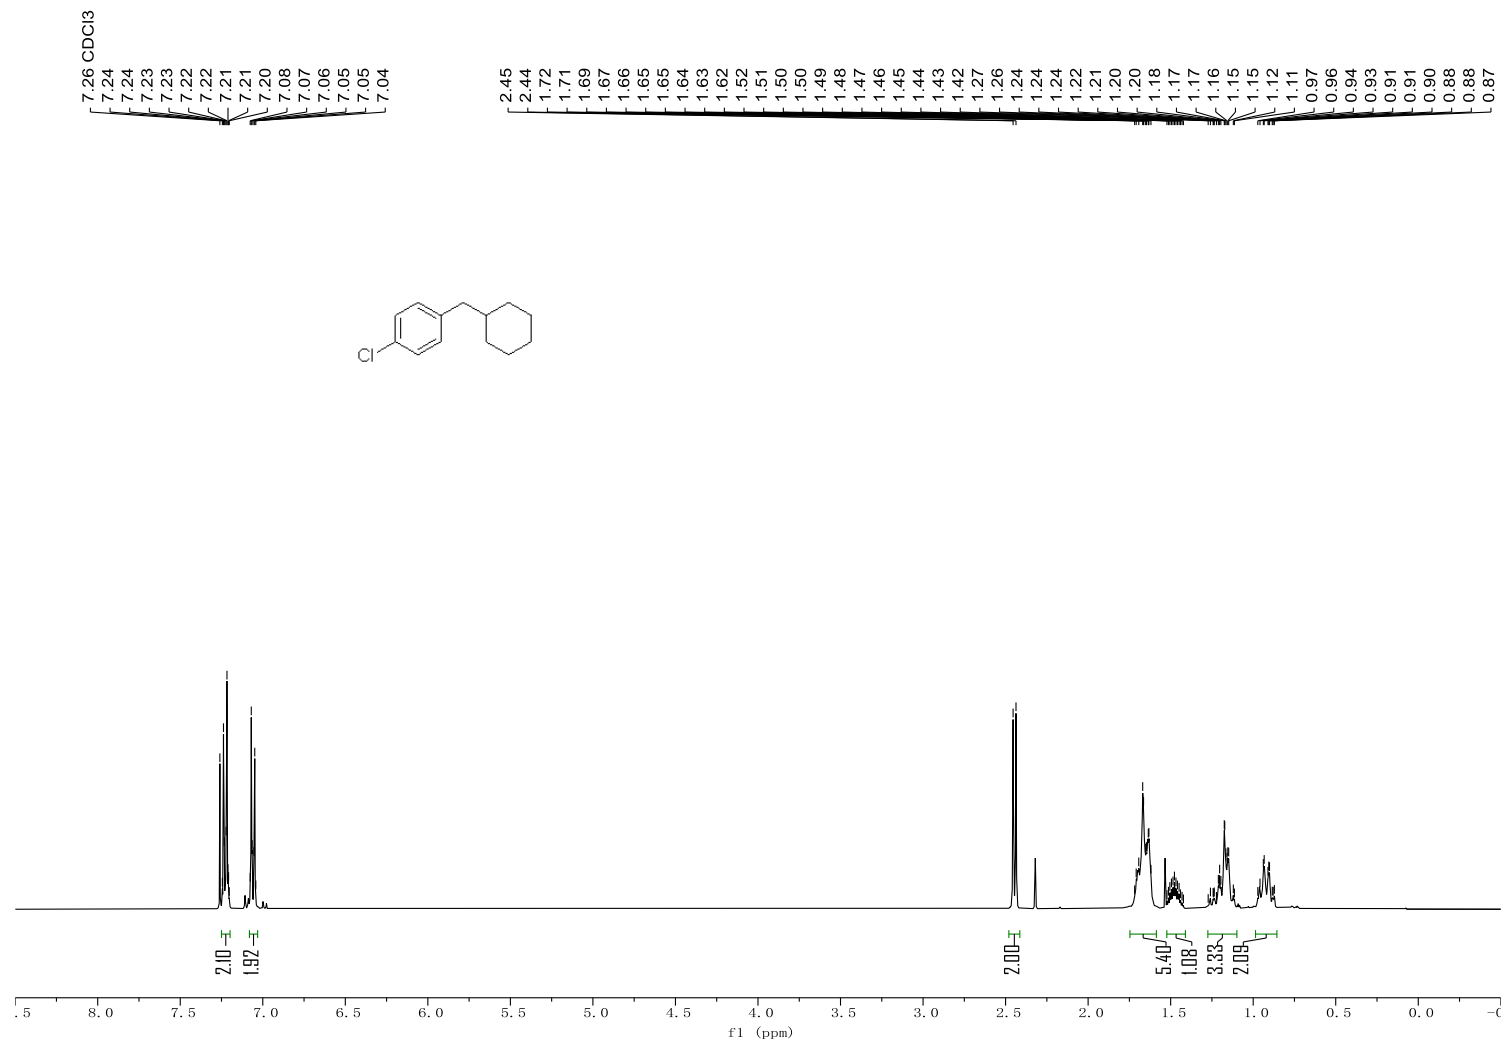

Figure S12  $^{13}\text{C}$  NMR of 3c

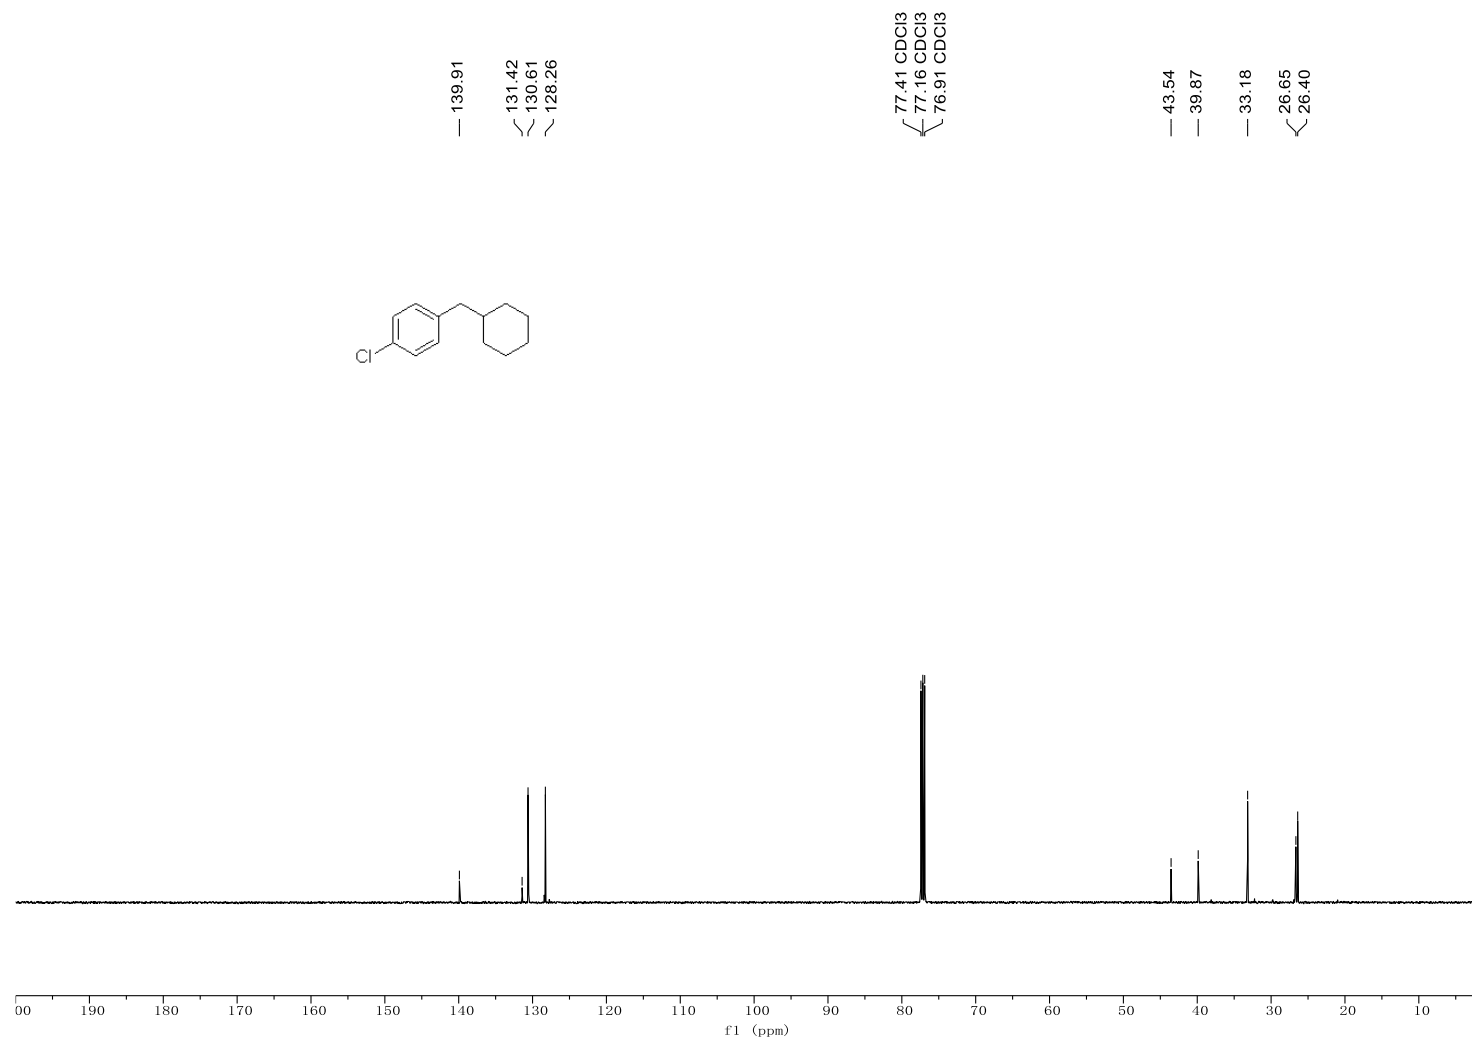

Figure S13  $^1\text{H}$  NMR of 3d

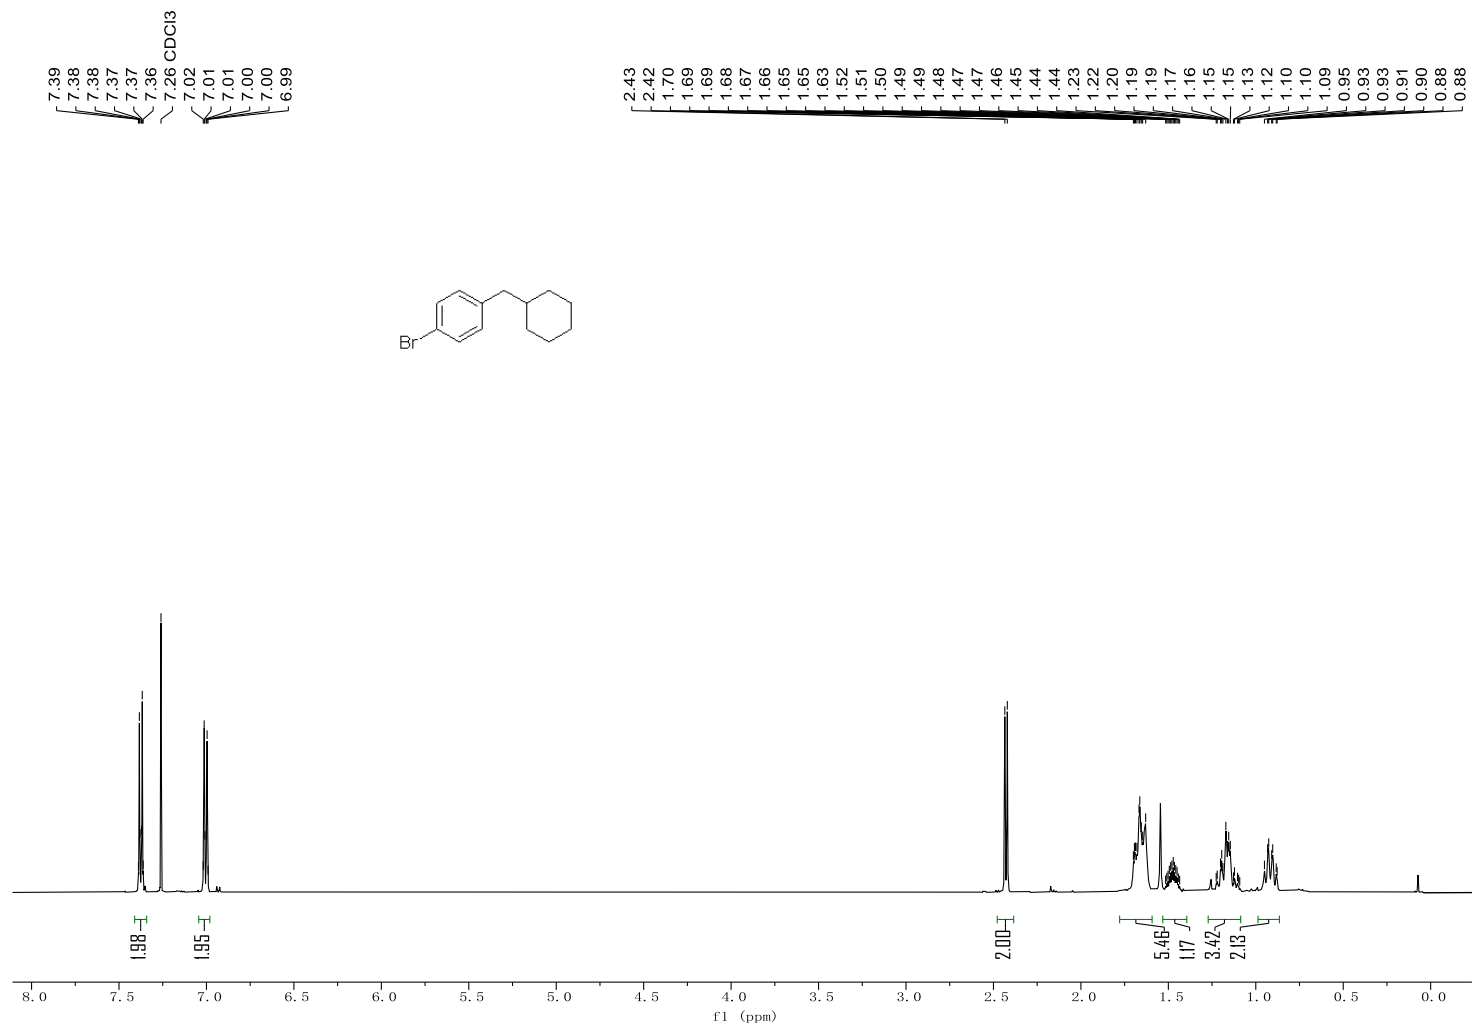

Figure S14  $^{13}\text{C}$  NMR of 3d

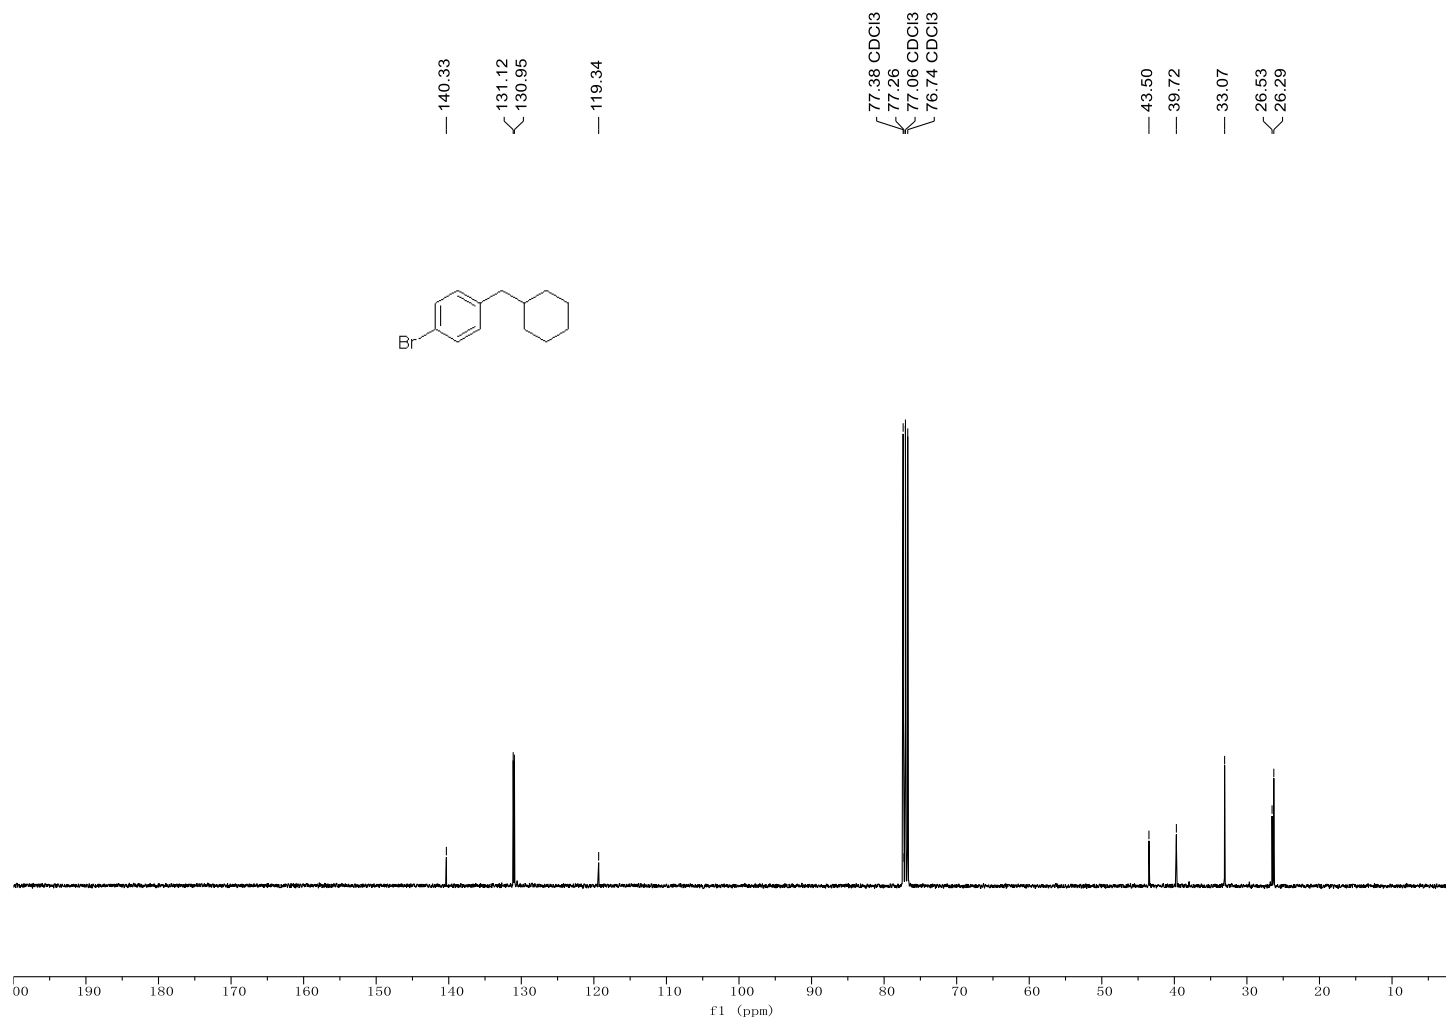

Figure S15  $^1\text{H}$  NMR of 3f

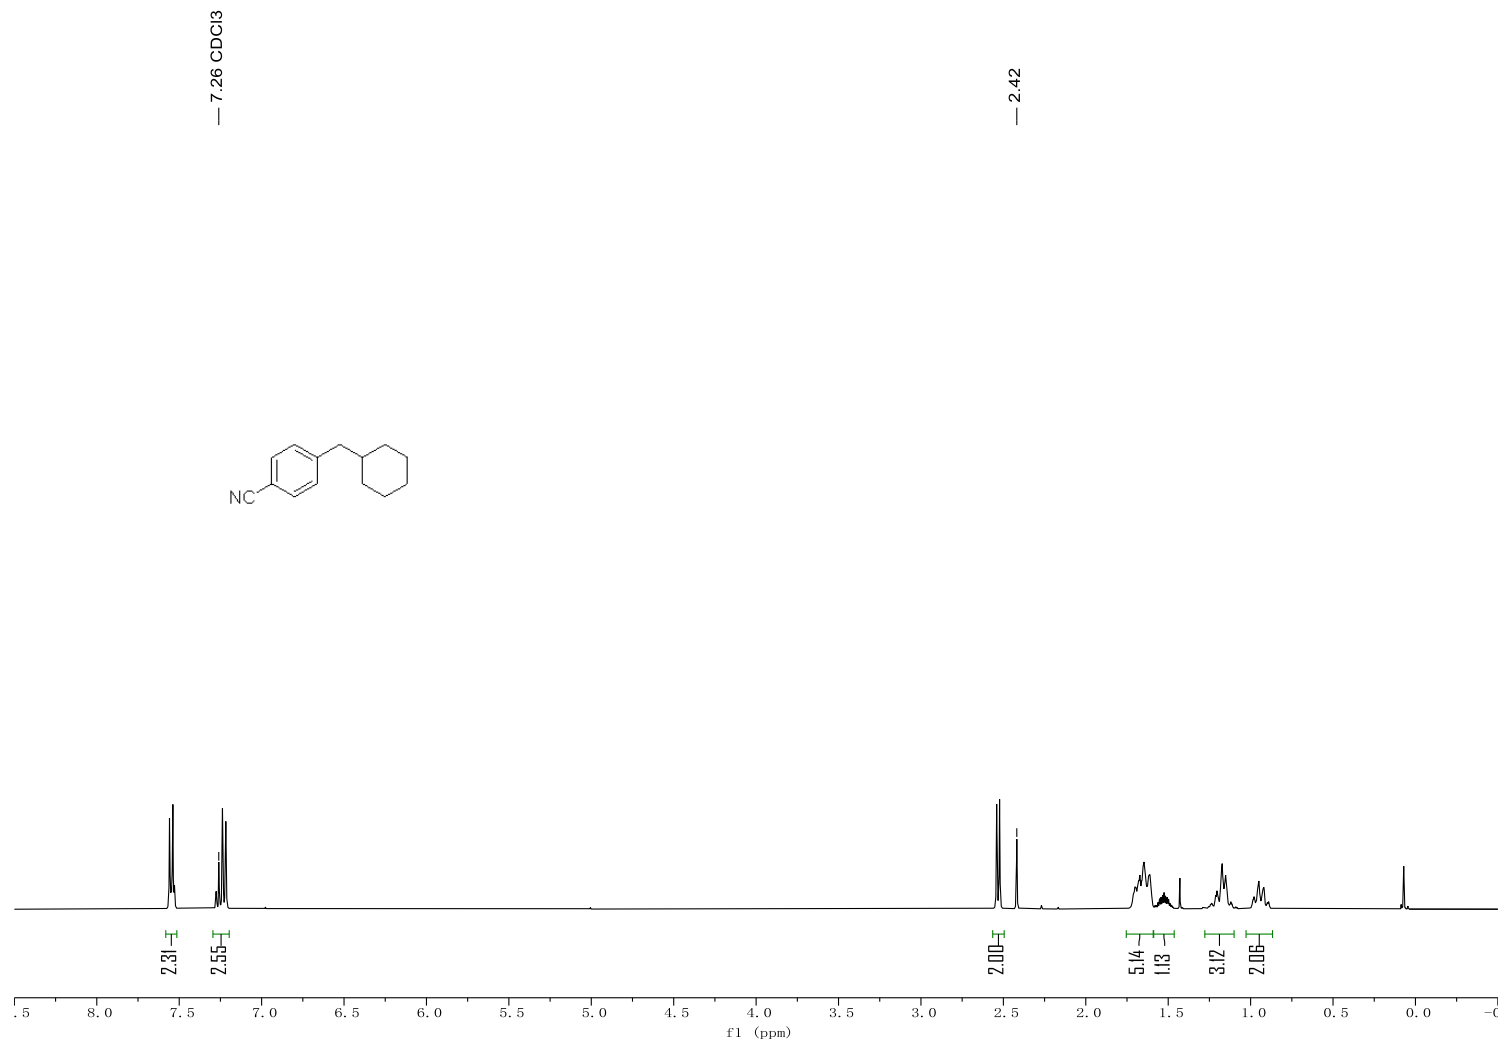

Figure S16  $^{13}\text{C}$  NMR of 3f

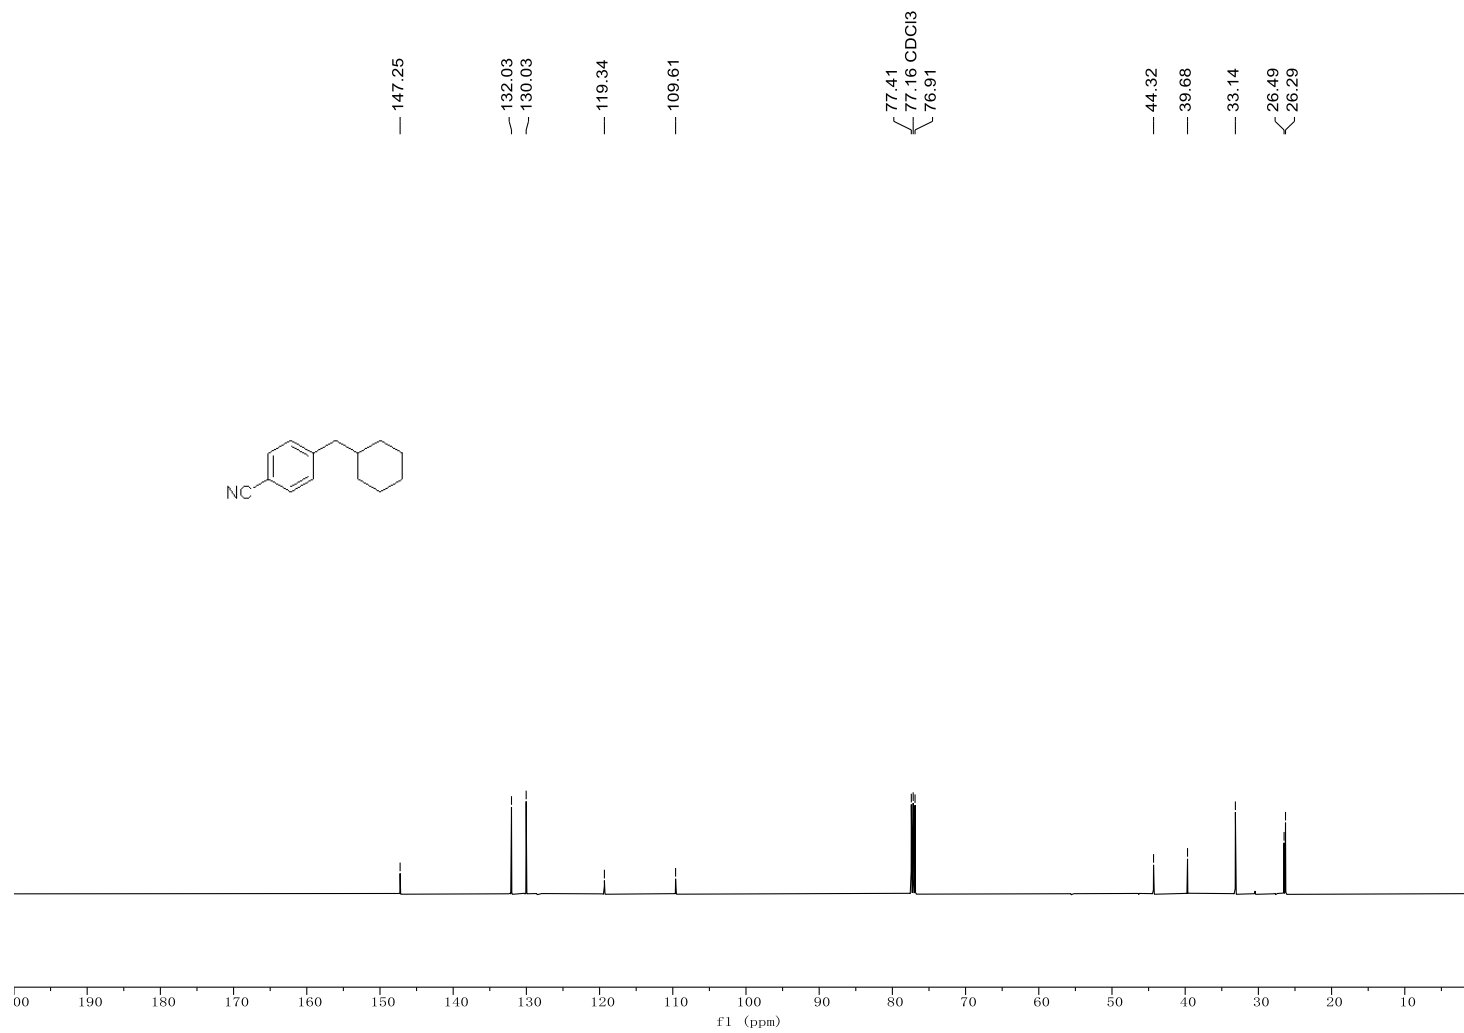

Figure S17  $^1\text{H}$  NMR of 3g

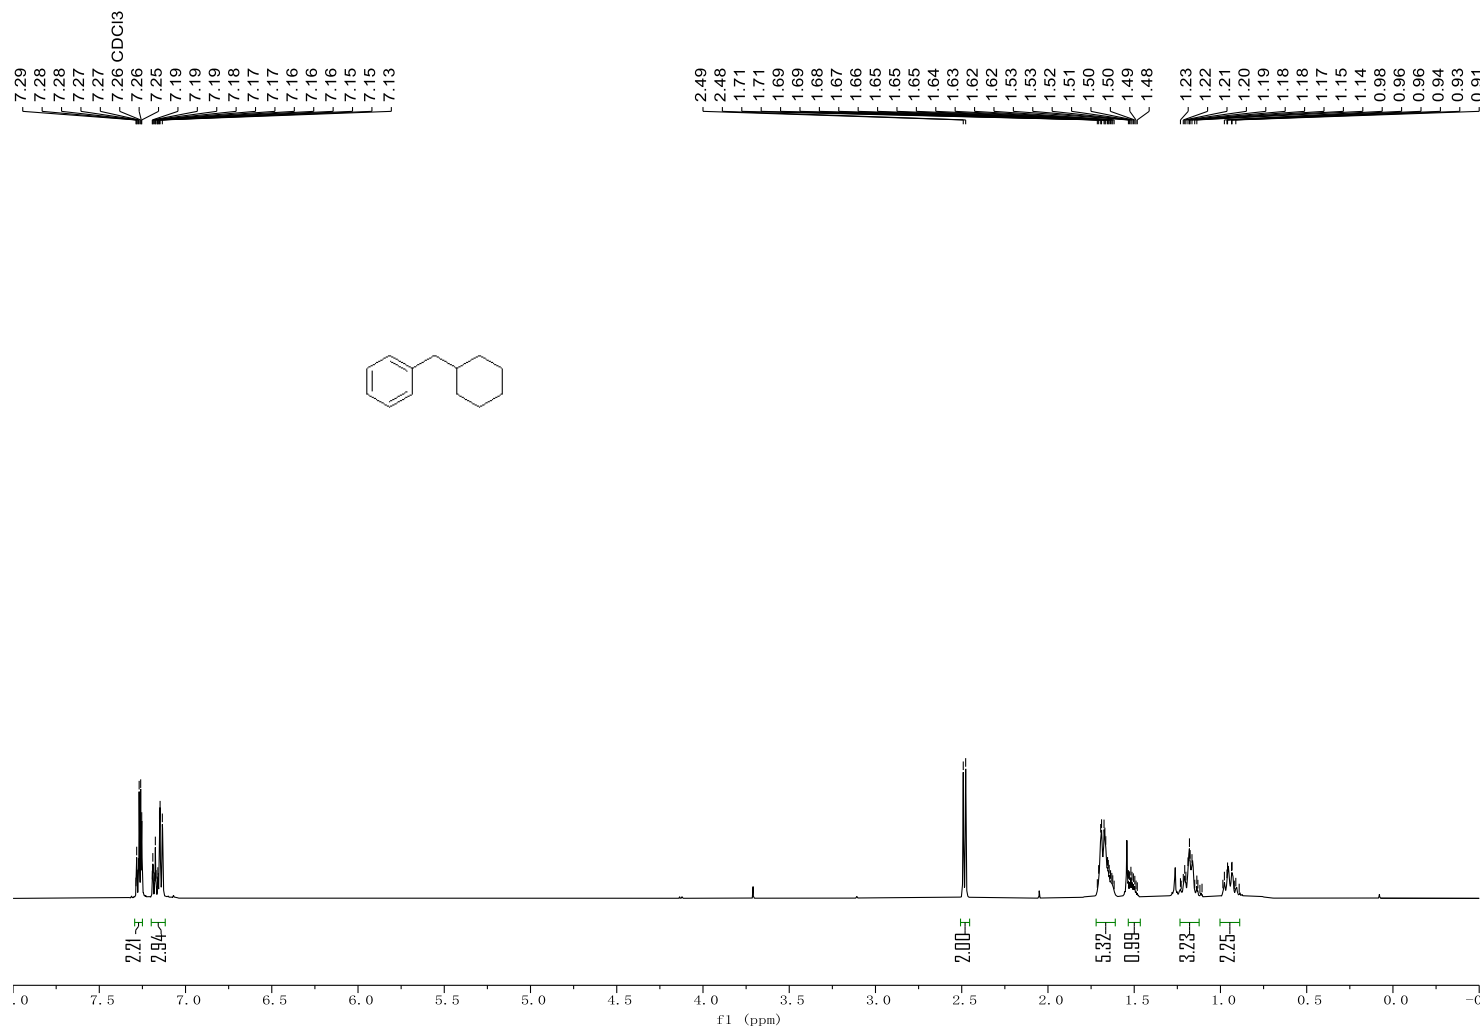



Figure S18  $^1\text{H}$  NMR of 3h

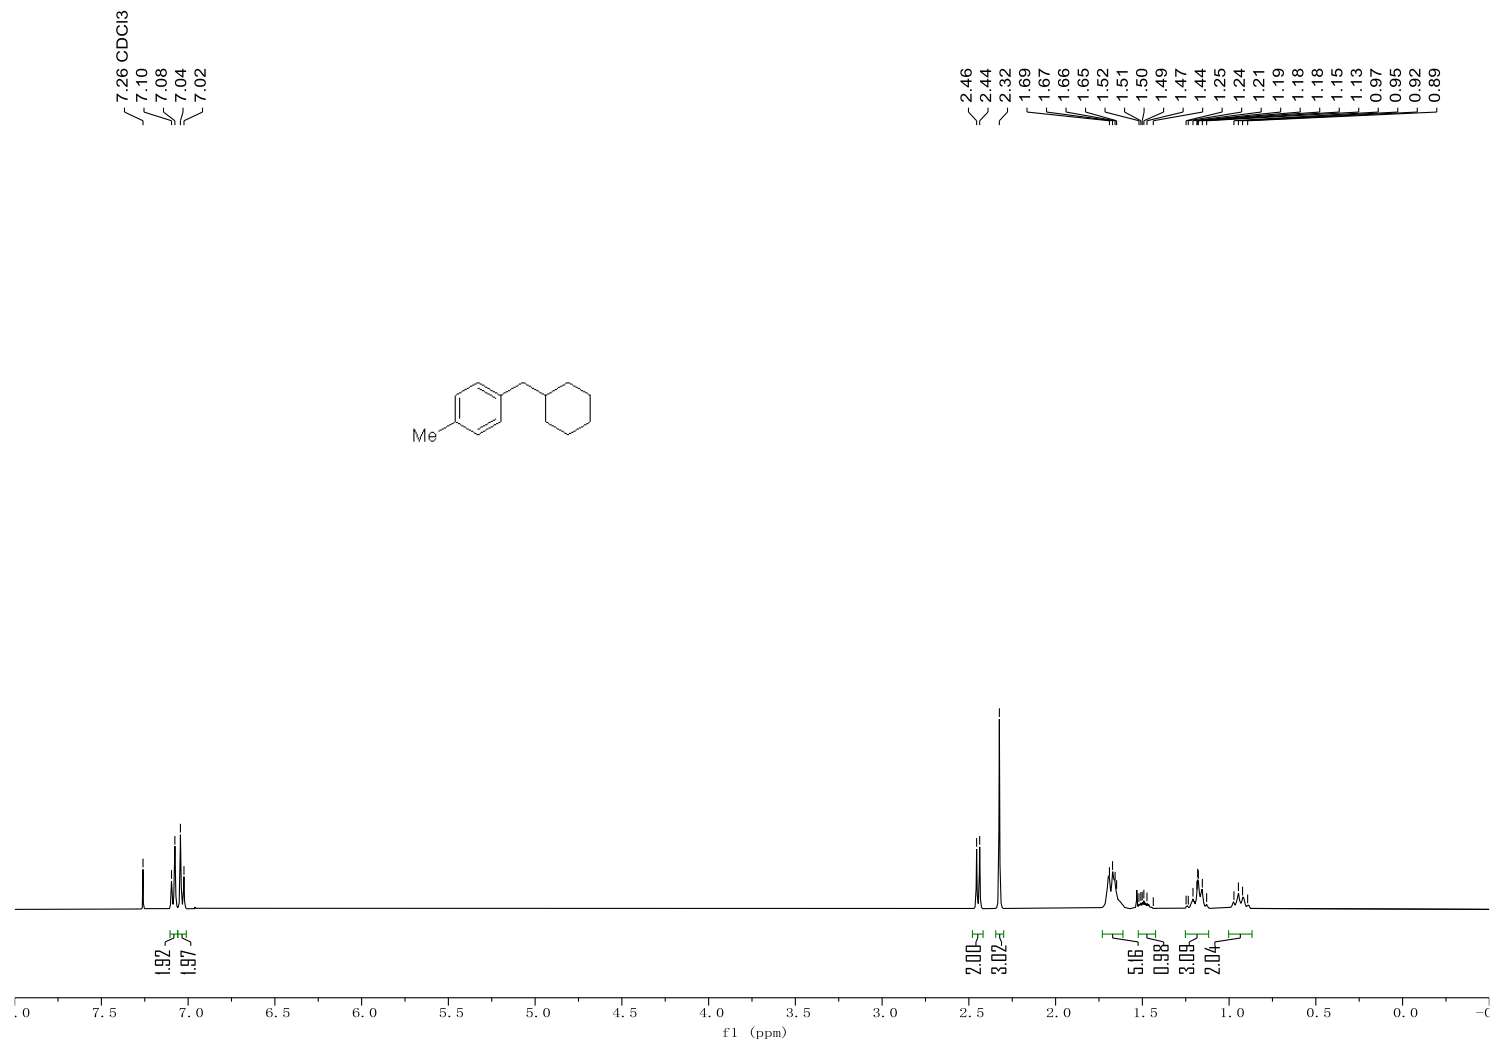

Figure S19  $^{13}\text{C}$  NMR of 3h

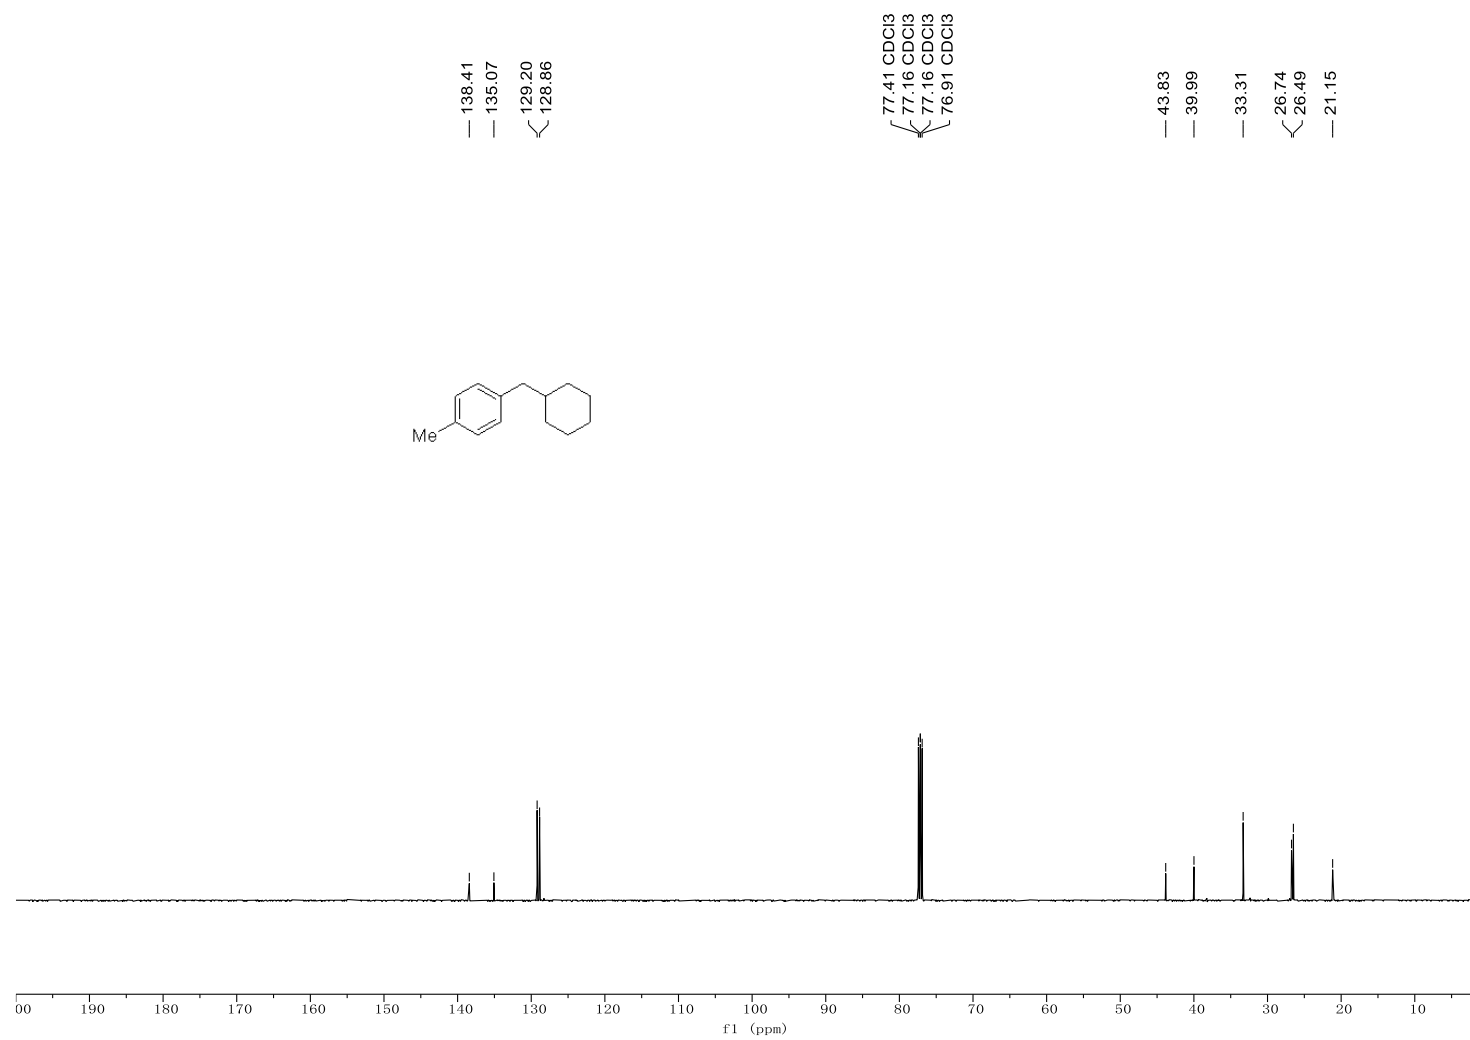

Figure S20  $^1\text{H}$  NMR of **3i**

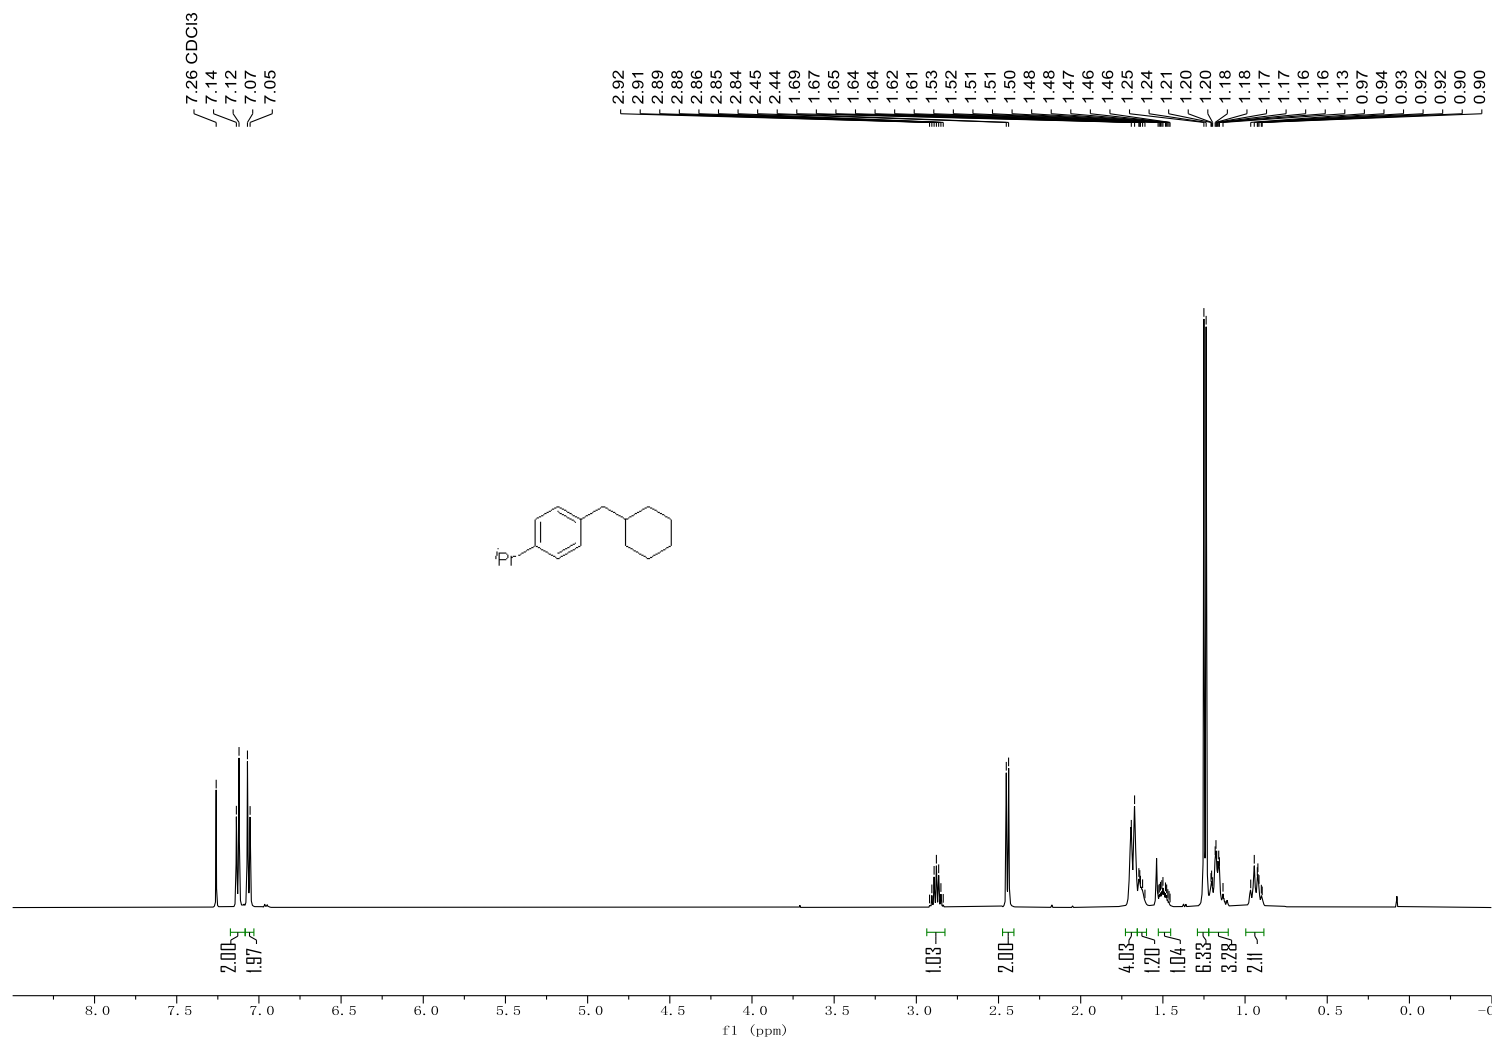

Figure S21  $^{13}\text{C}$  NMR of 3i

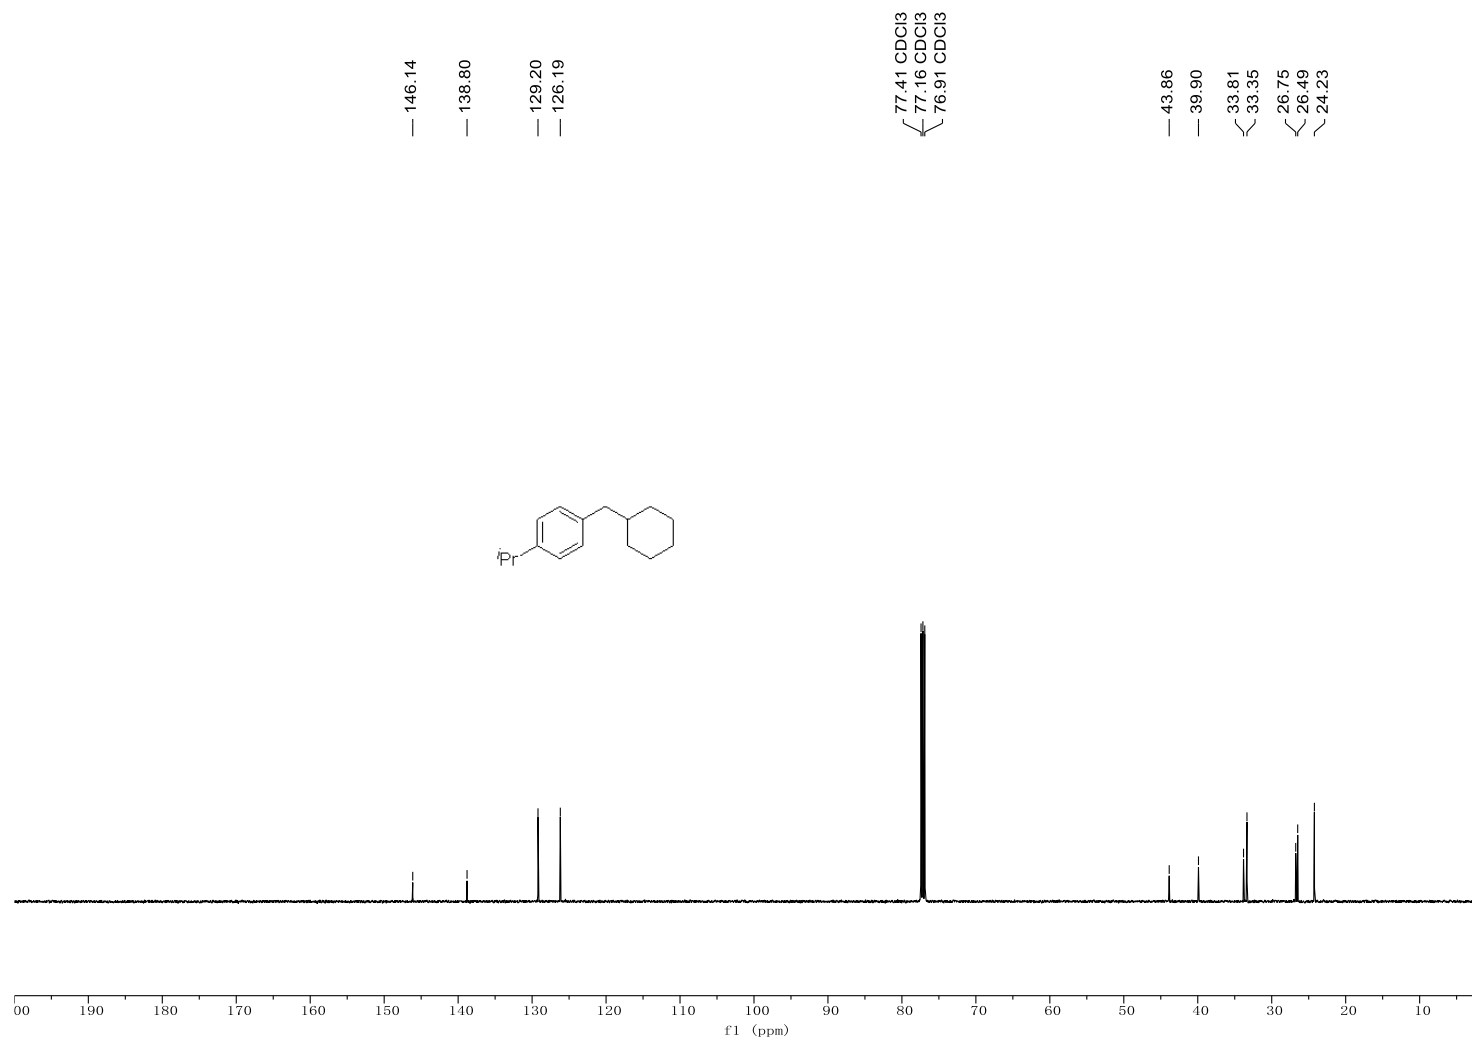

Figure S22  $^1\text{H}$  NMR of 3j

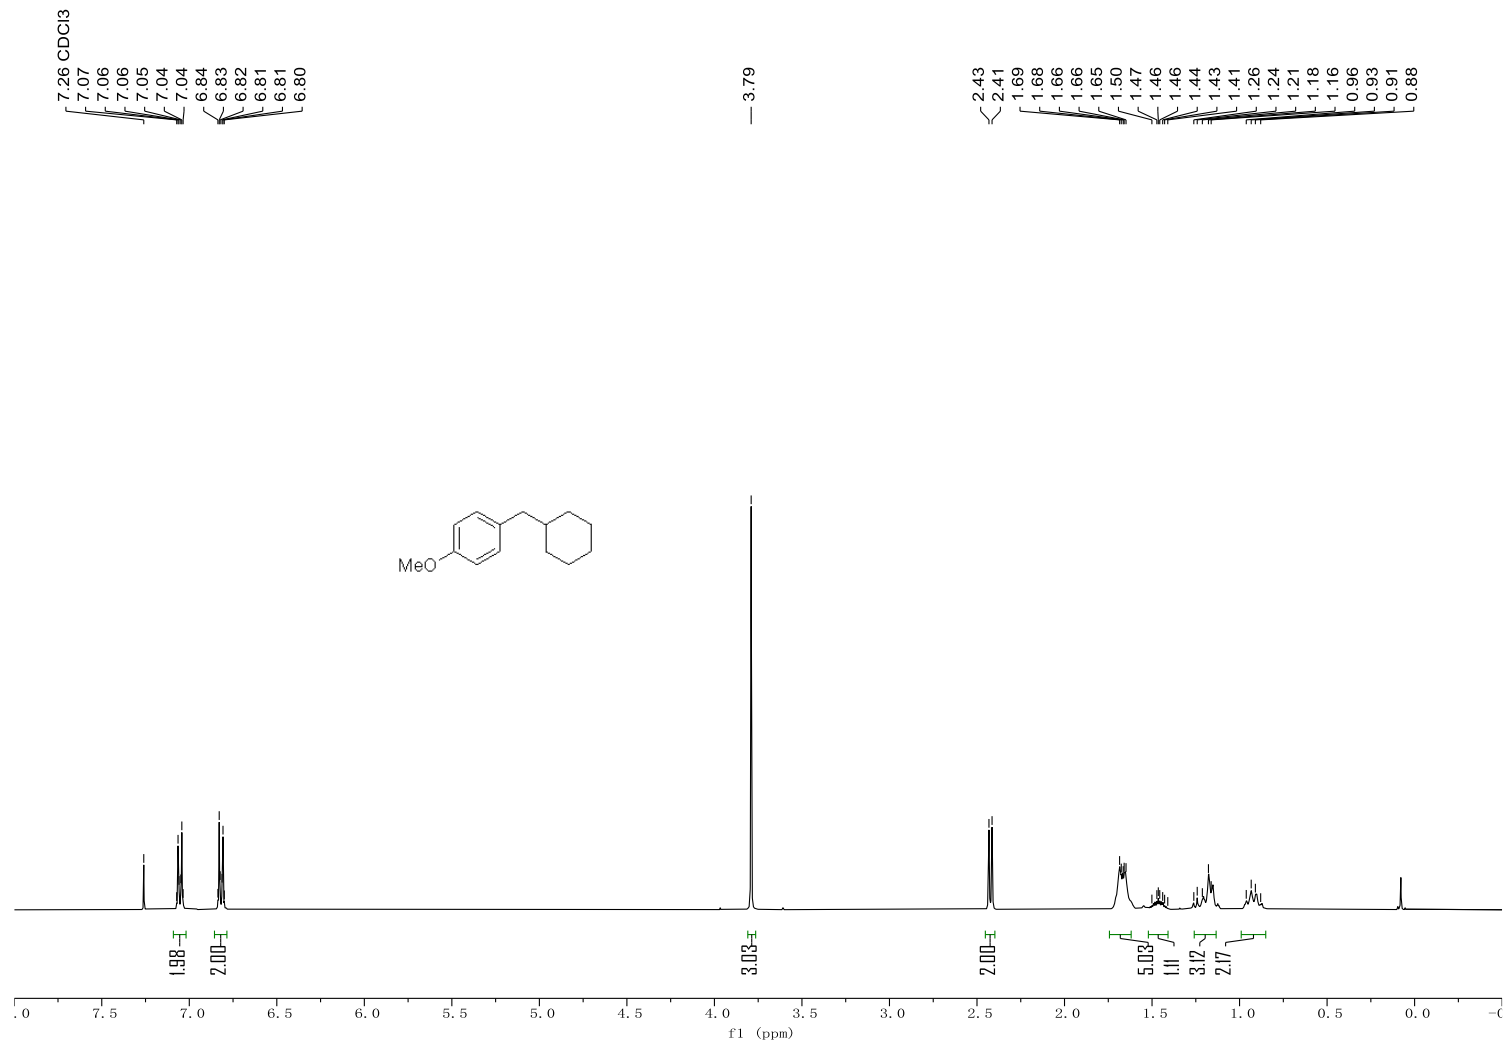

Figure S23  $^{13}\text{C}$  NMR of 3j

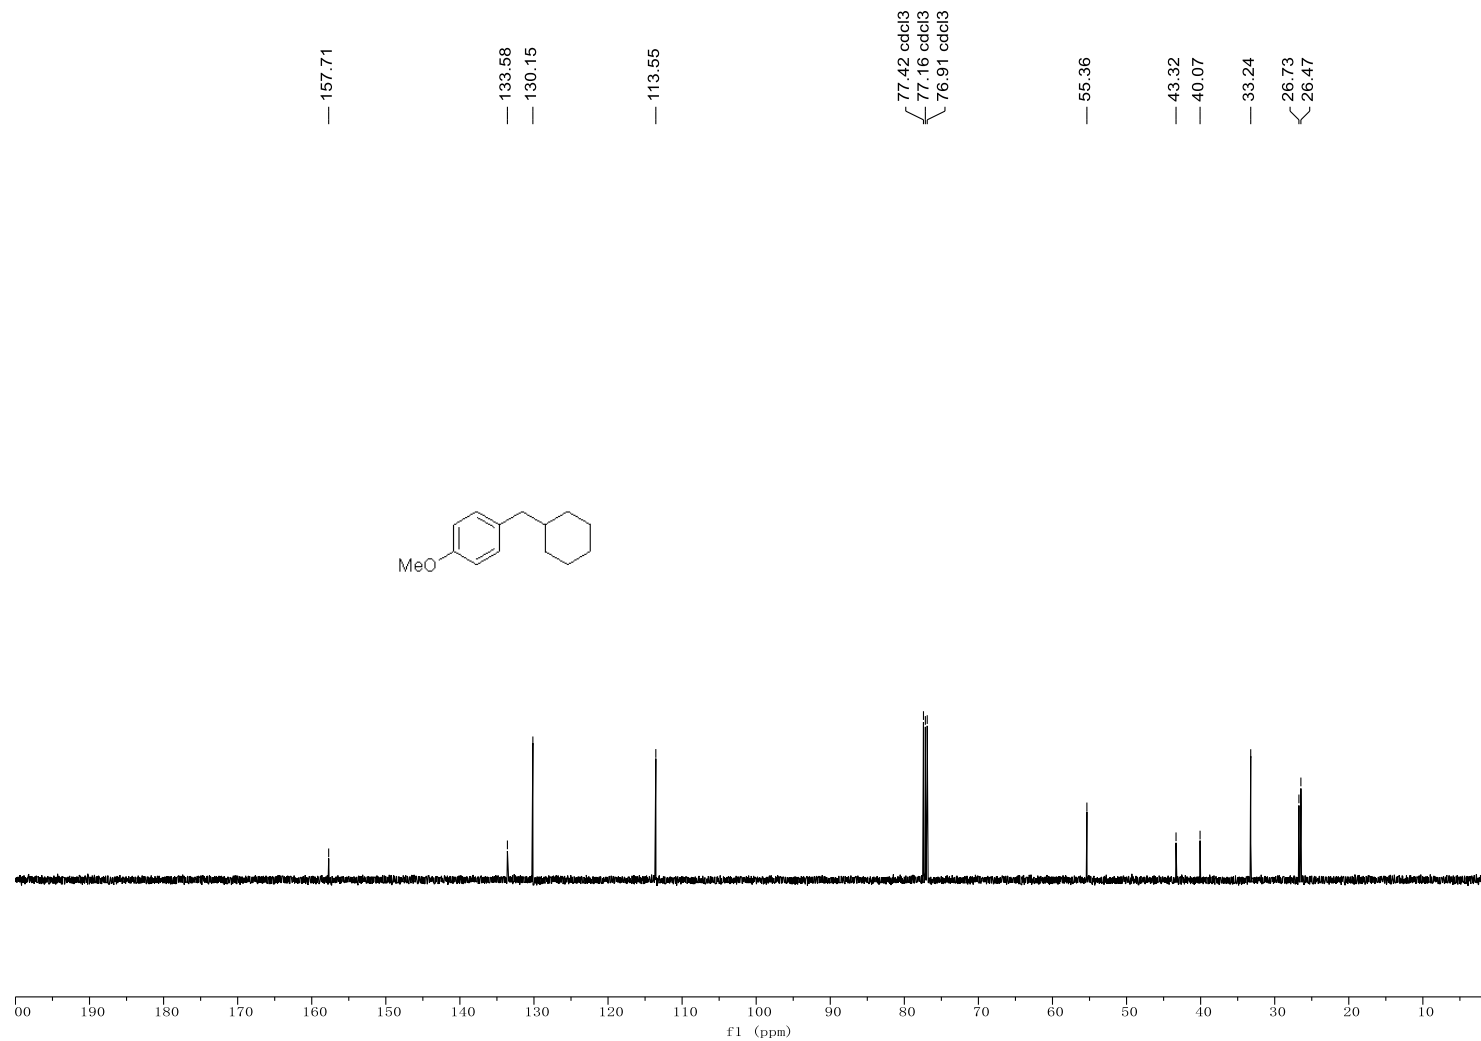

Figure S24  $^1\text{H}$  NMR of 3k

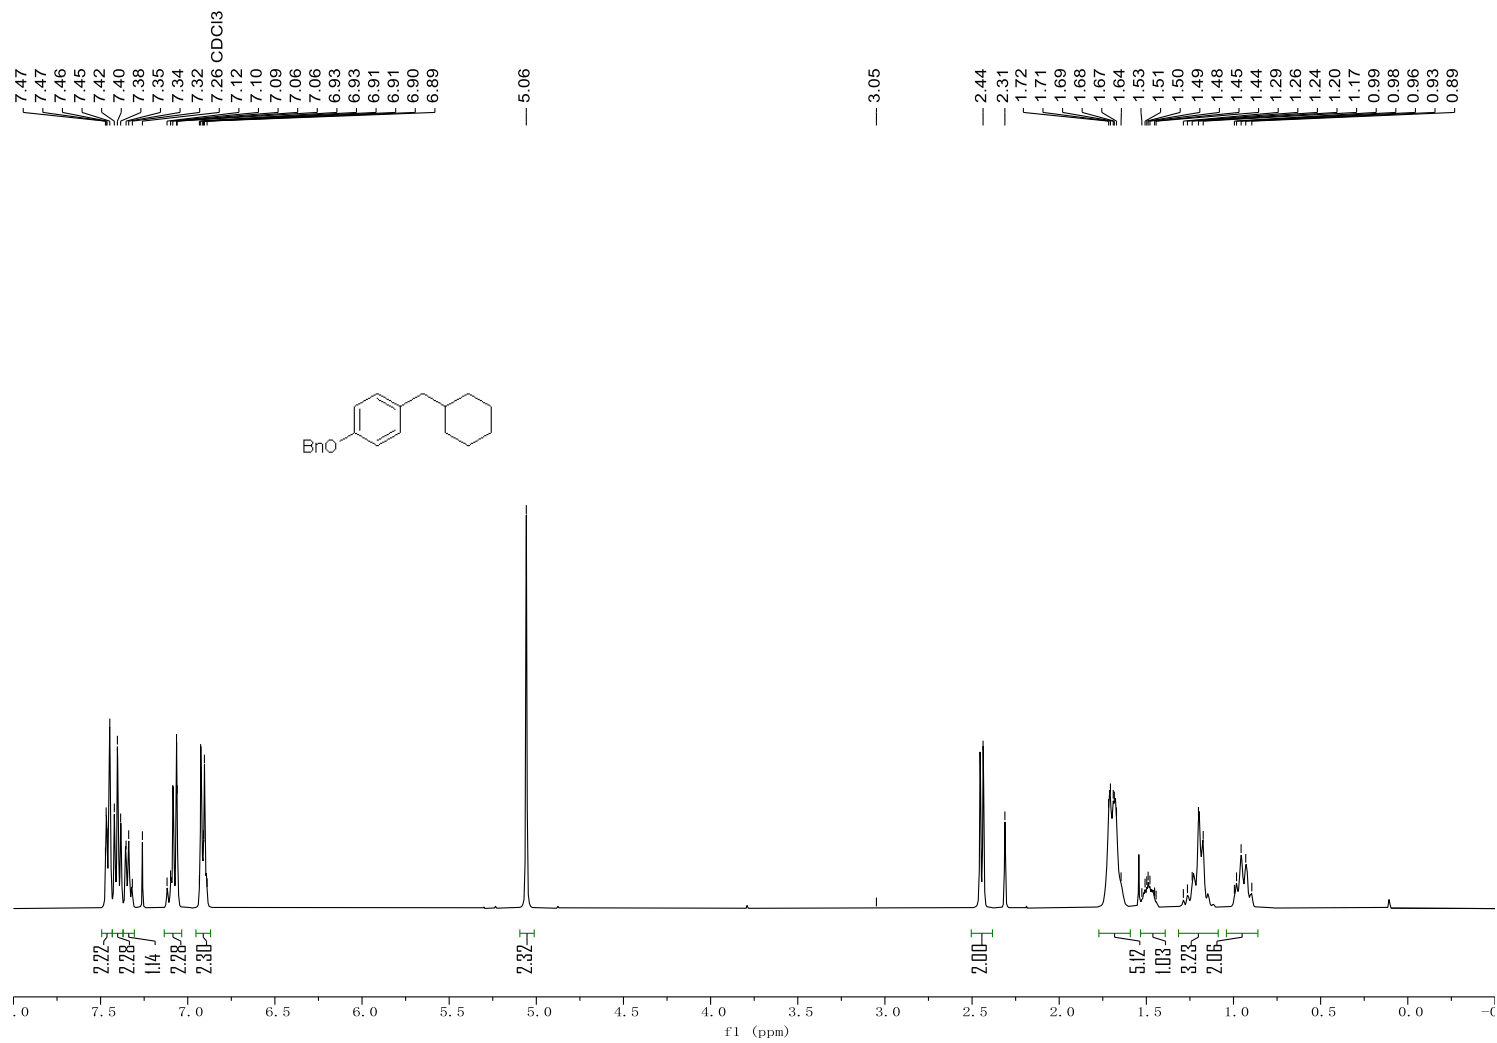

Figure S25  $^{13}\text{C}$  NMR of 3k

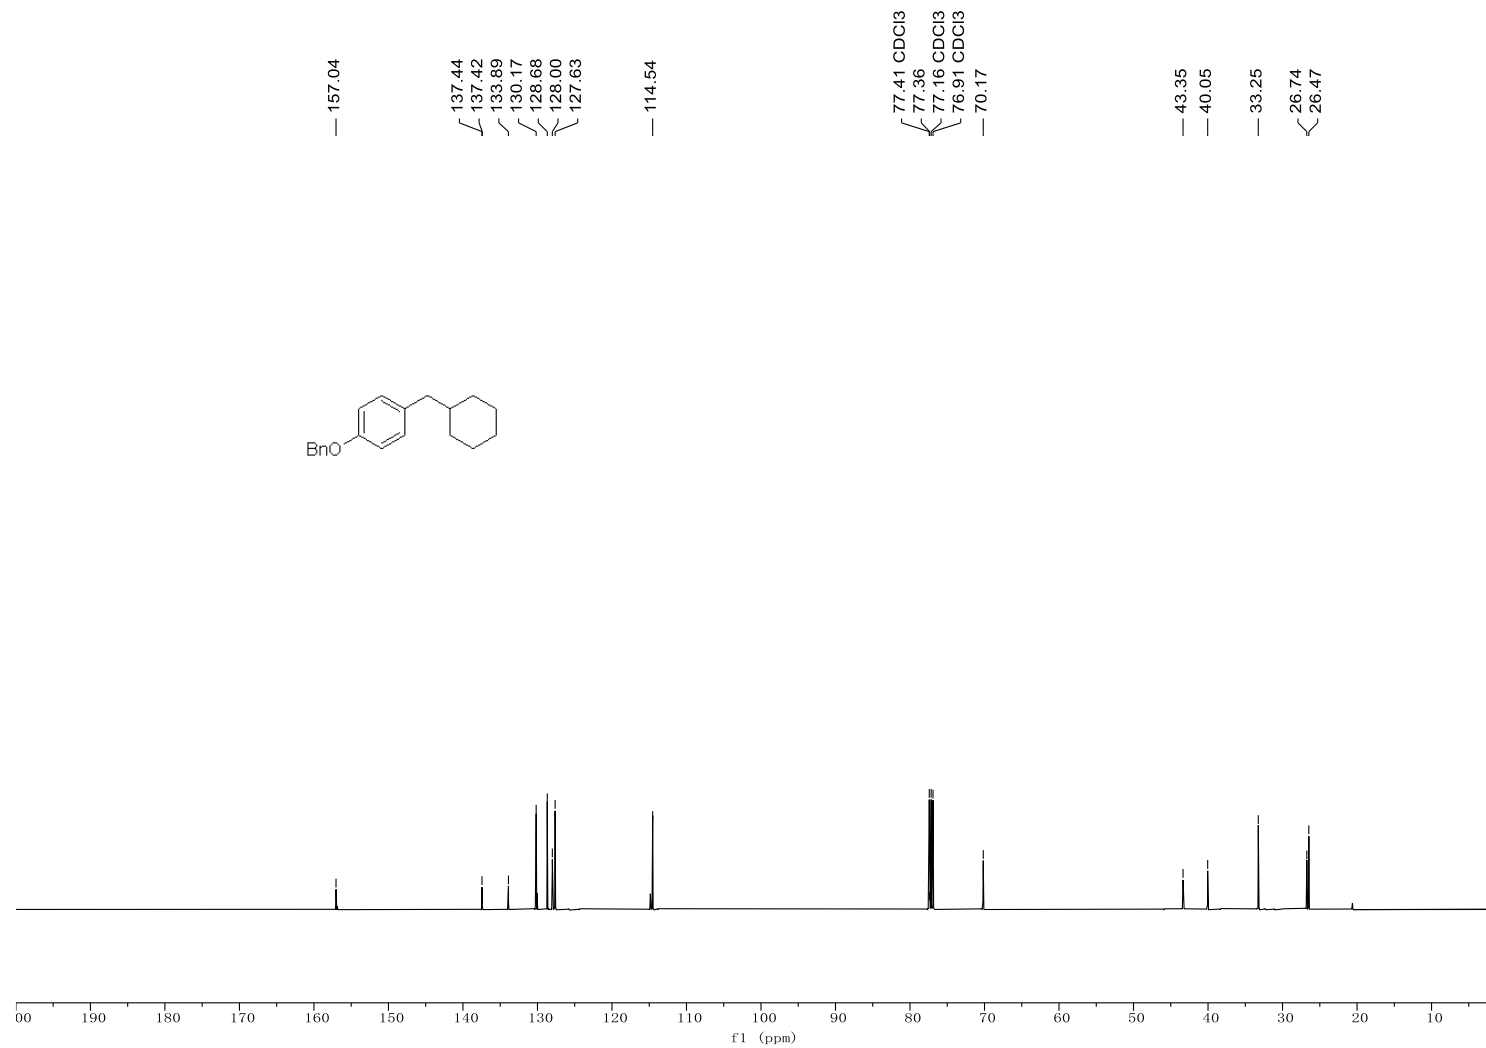



Figure S26 <sup>1</sup>H NMR of 31

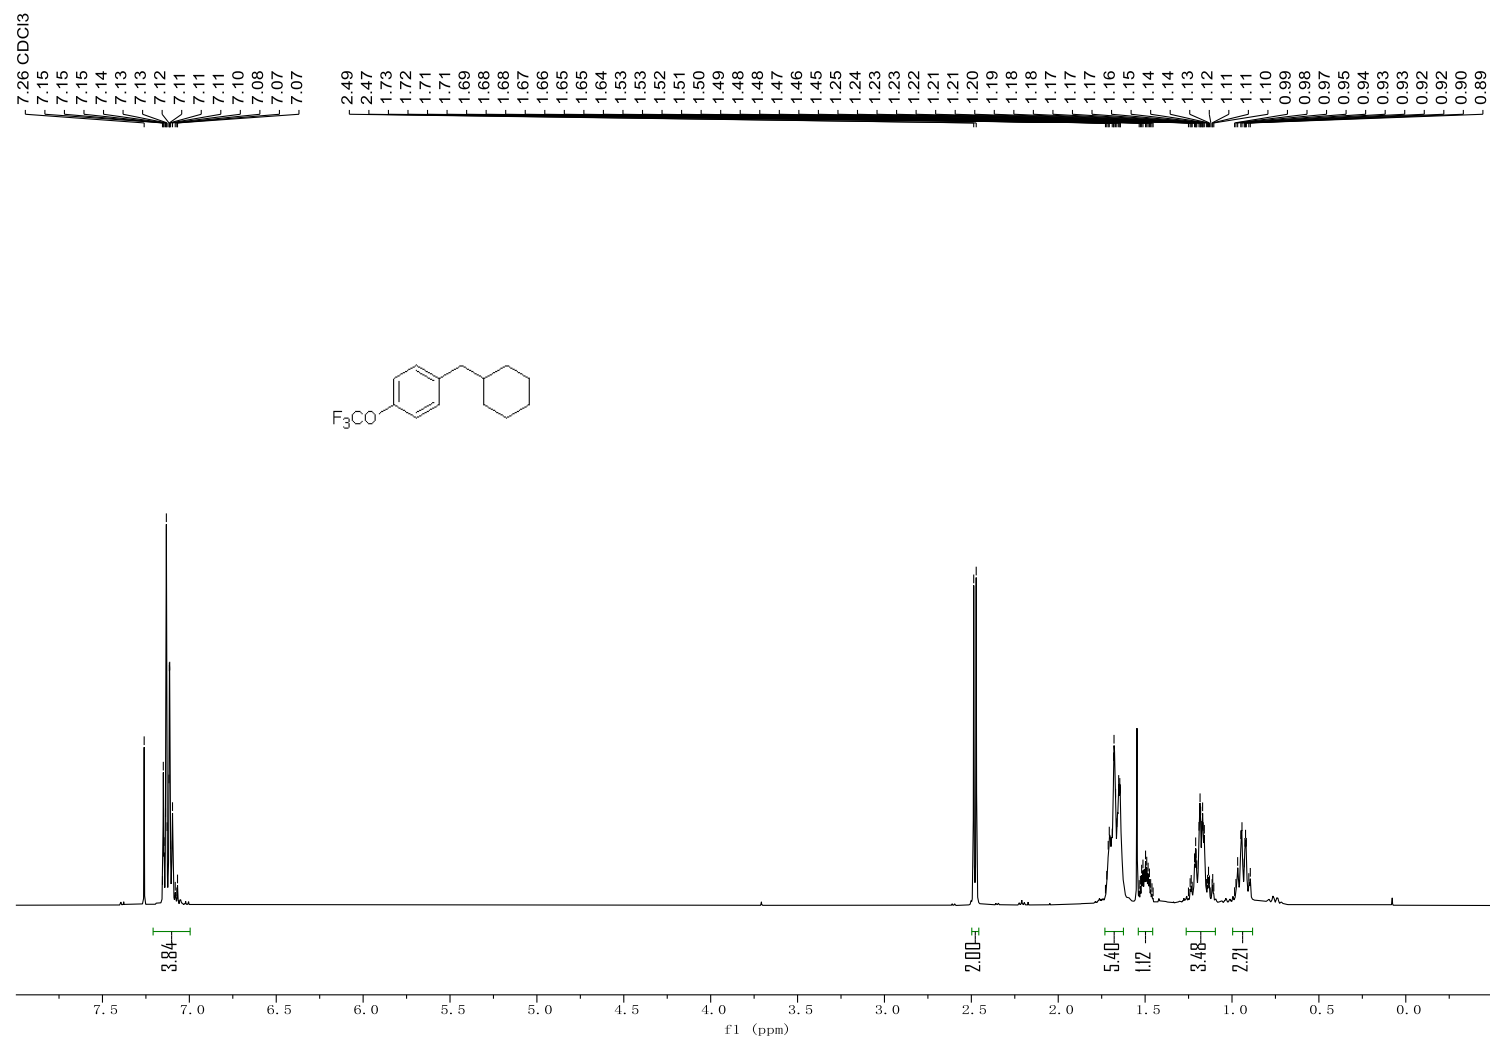

Figure S27 <sup>13</sup>C NMR of 3I

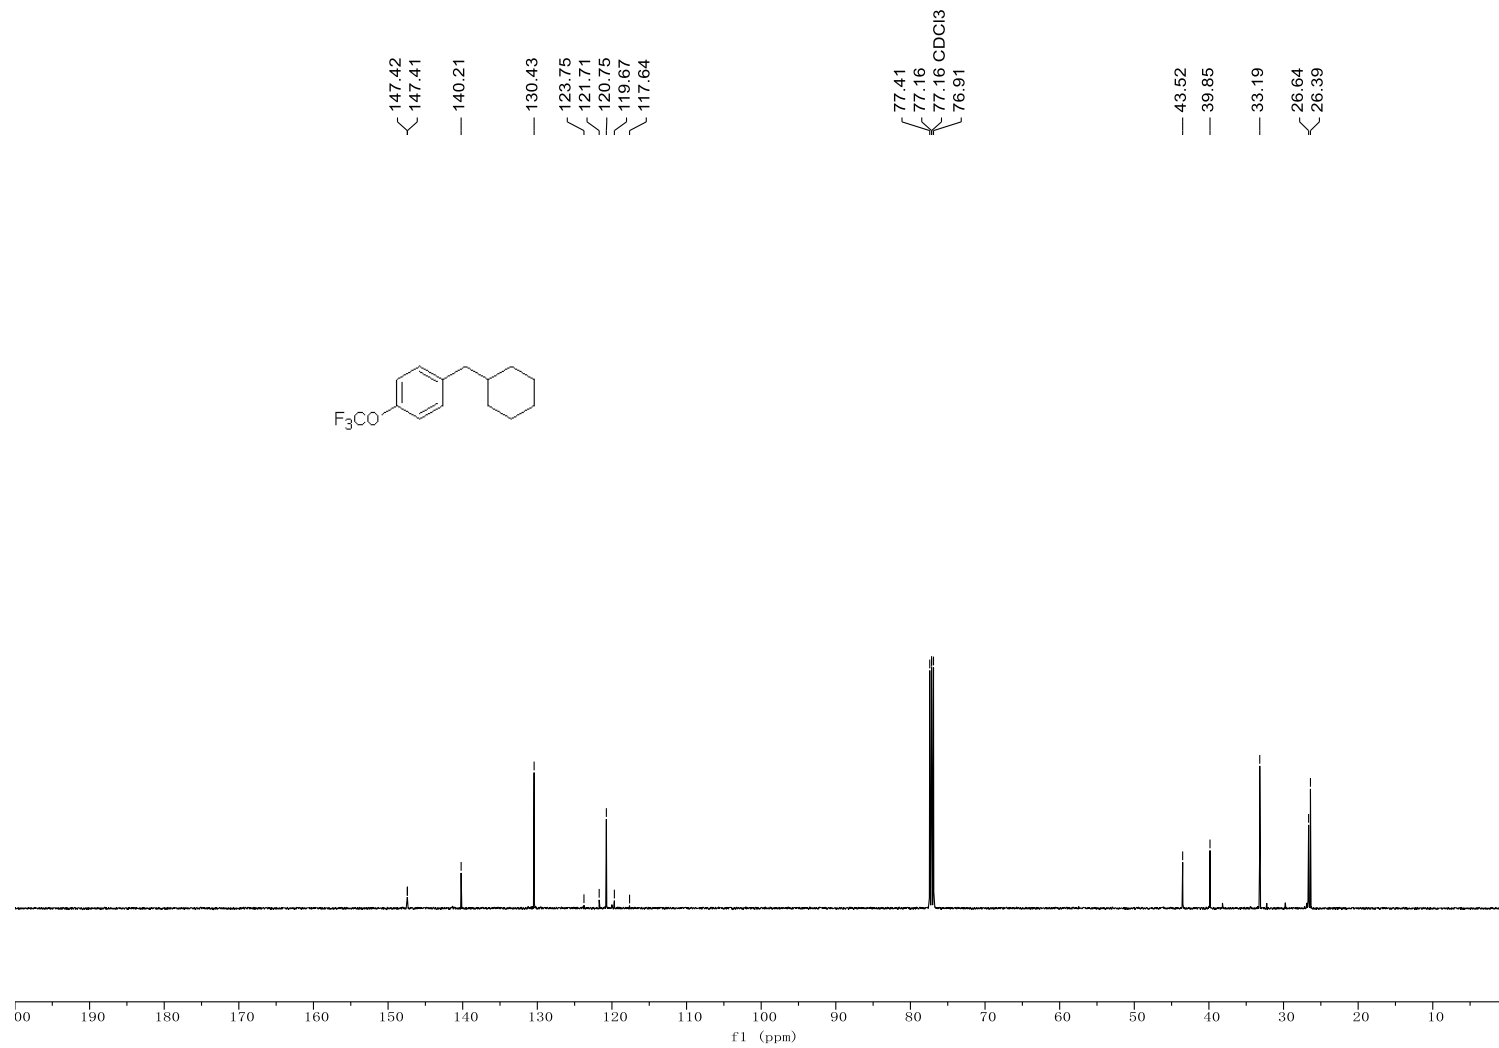

**Figure S28**  $^{19}\text{F}$  NMR of **31**

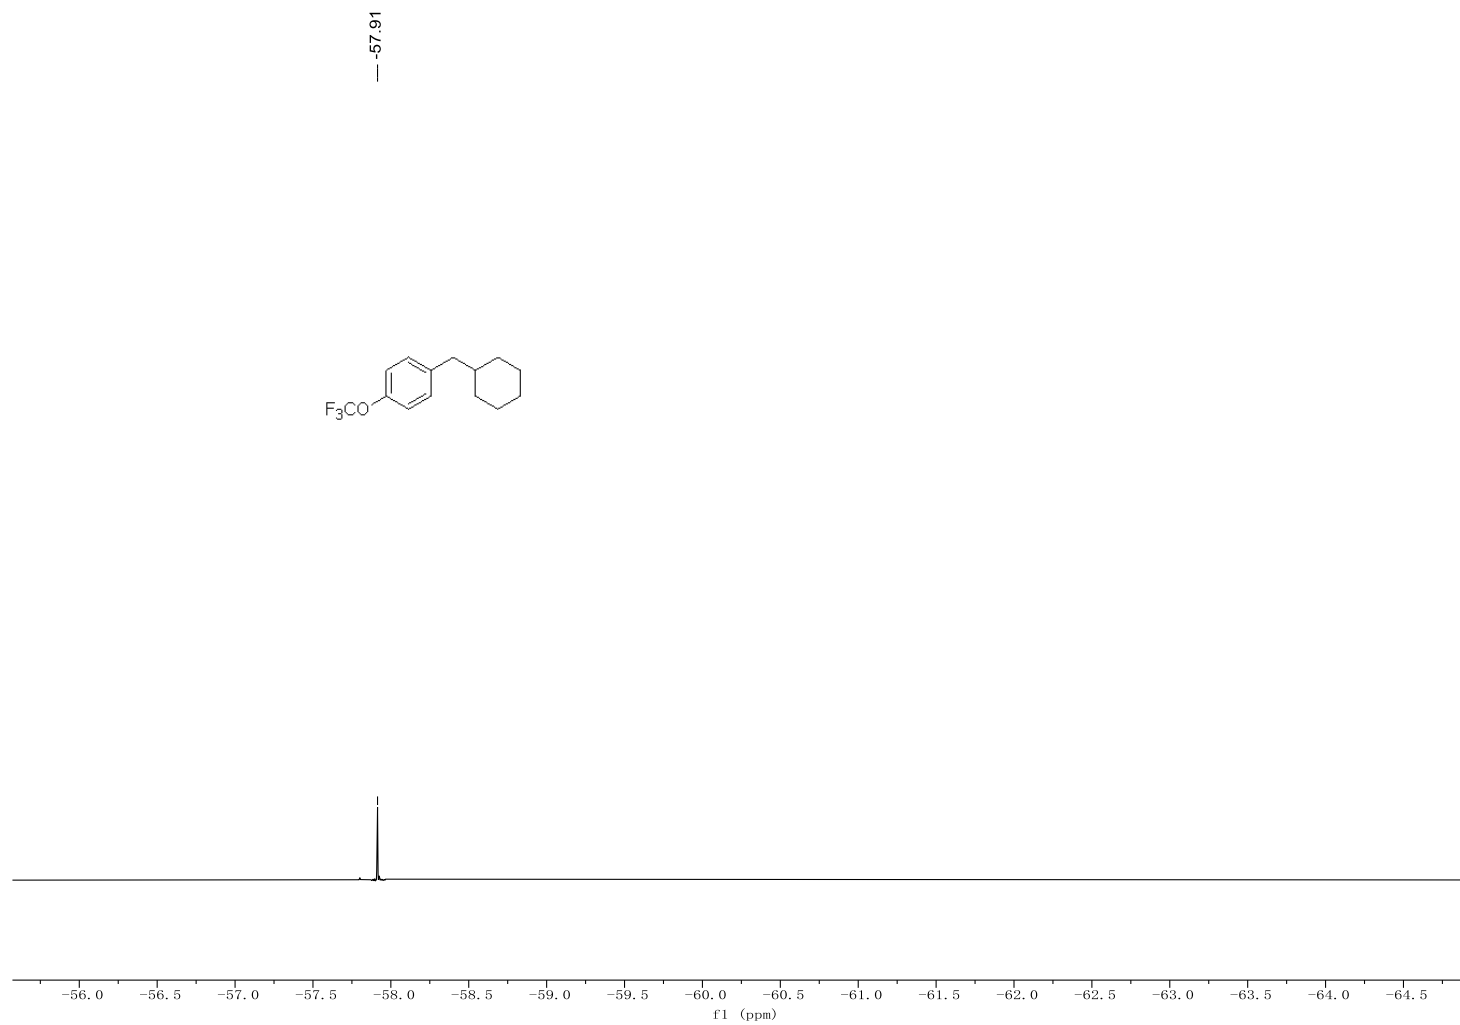

Figure S29  $^1\text{H}$  NMR of 3m

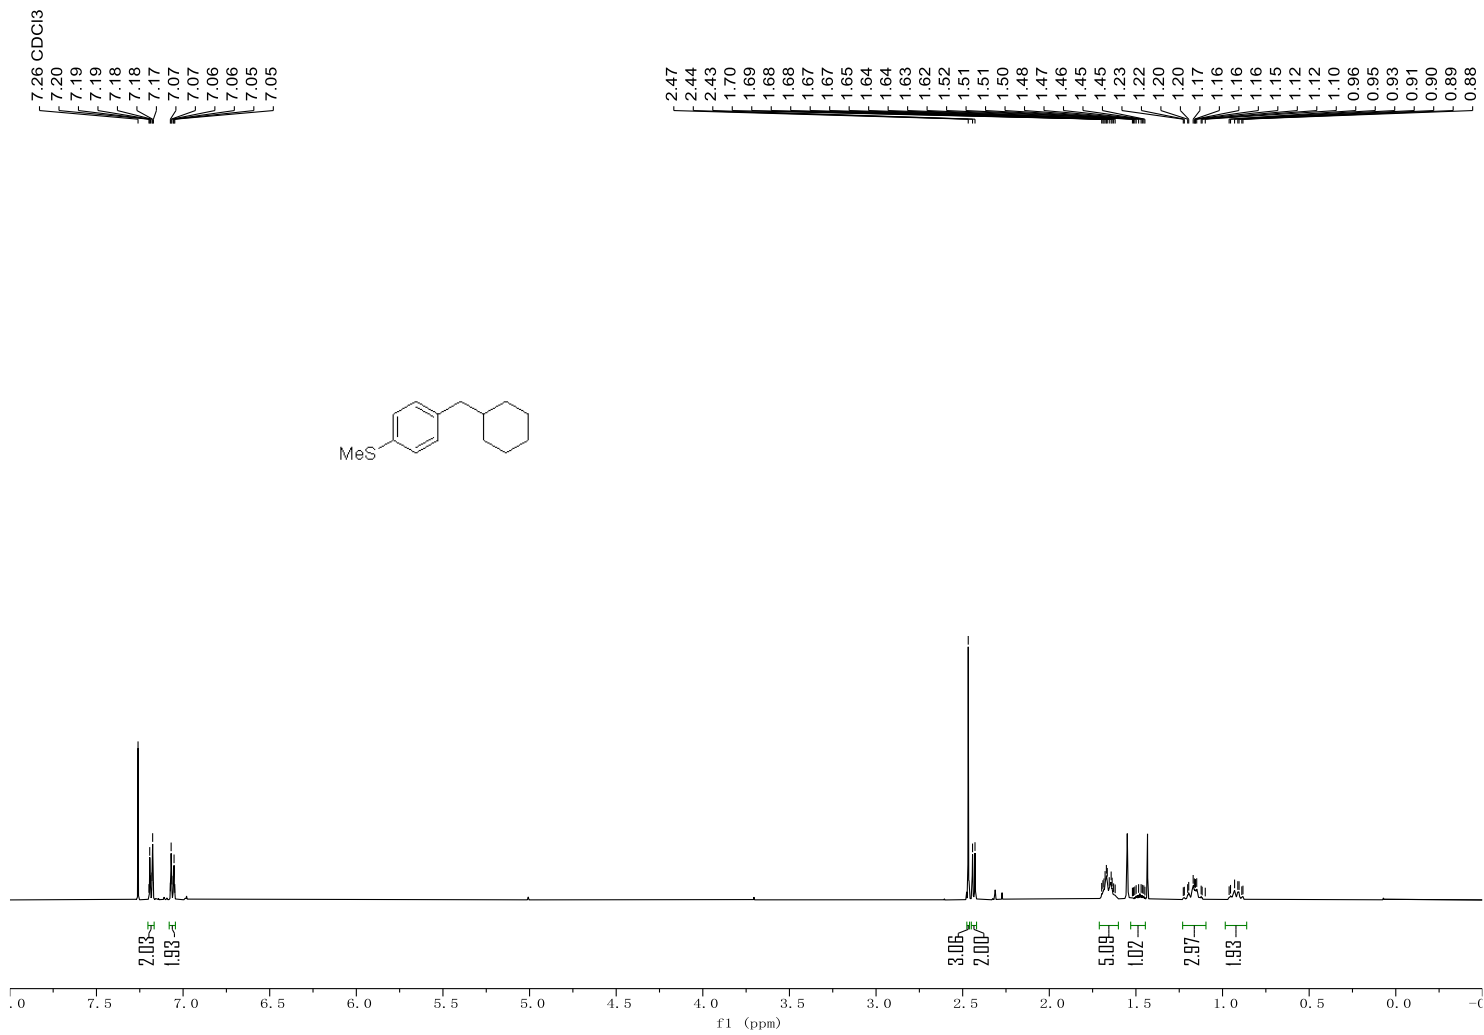

Figure S30  $^{13}\text{C}$  NMR of 3m

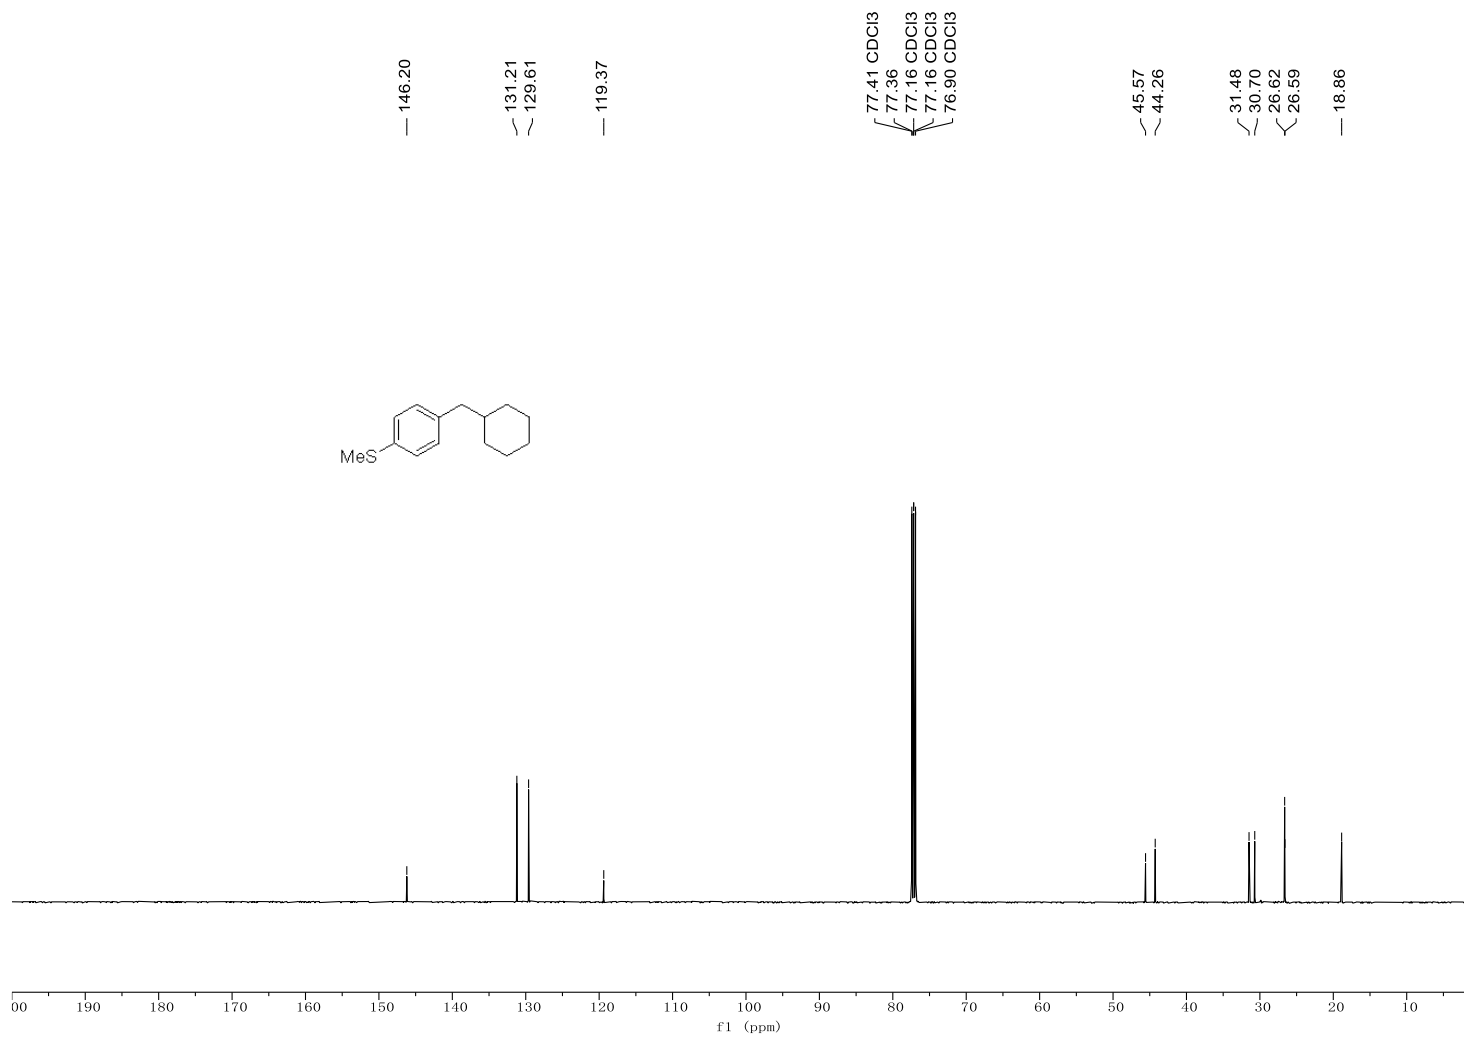

Figure S31  $^1\text{H}$  NMR of 3n

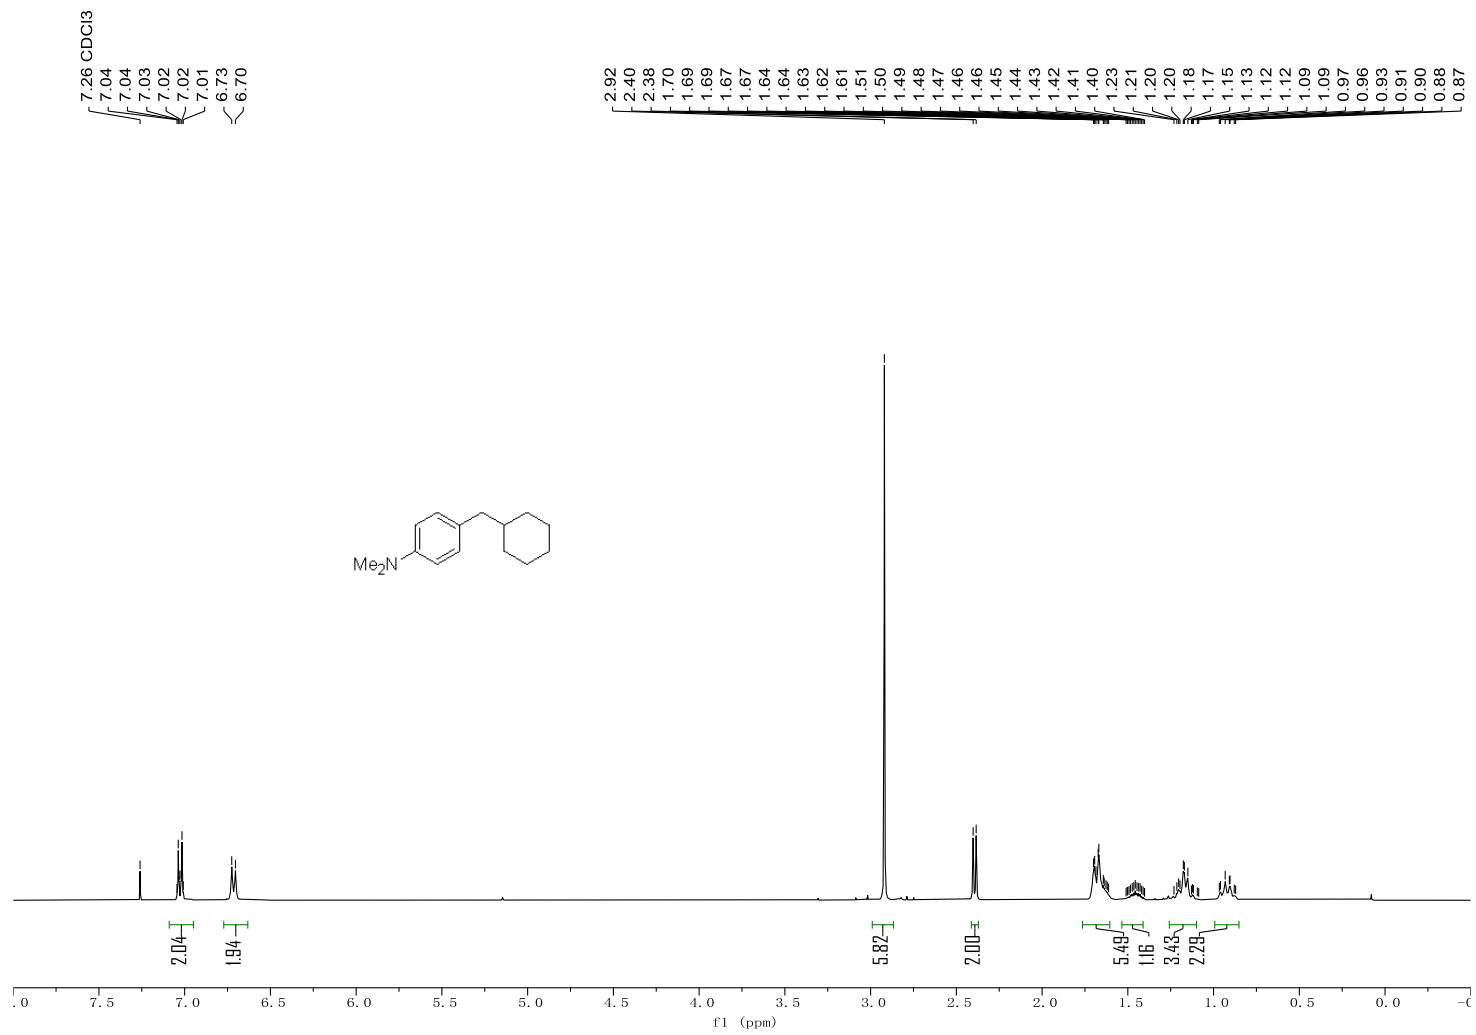

Figure S32  $^{13}\text{C}$  NMR of 3n

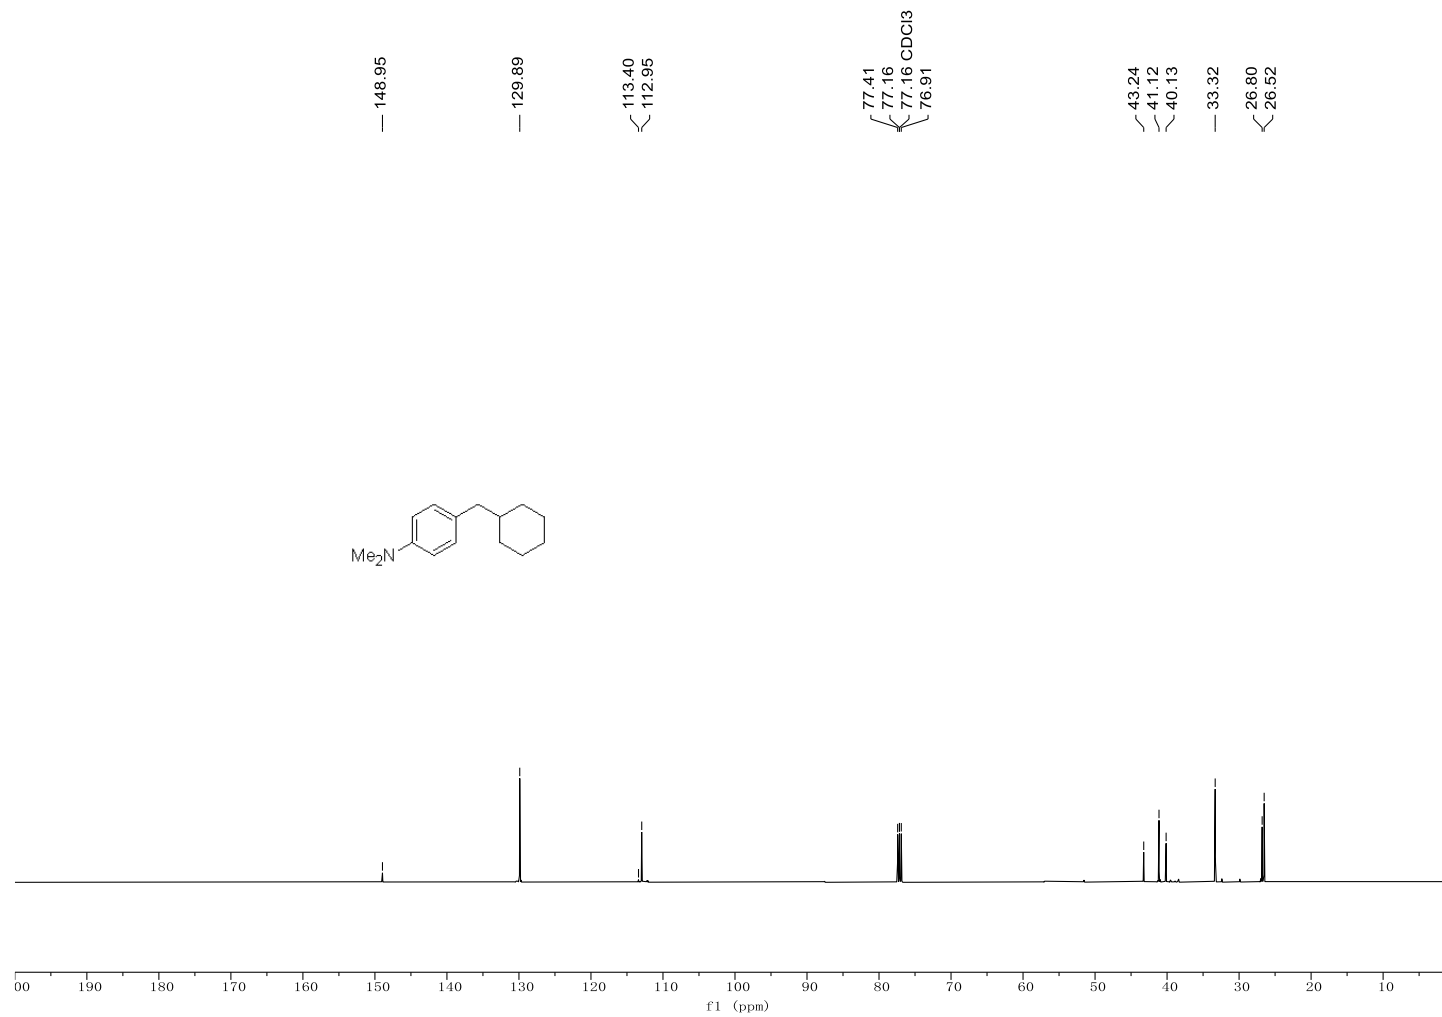

Figure S33  $^1\text{H}$  NMR of 3o

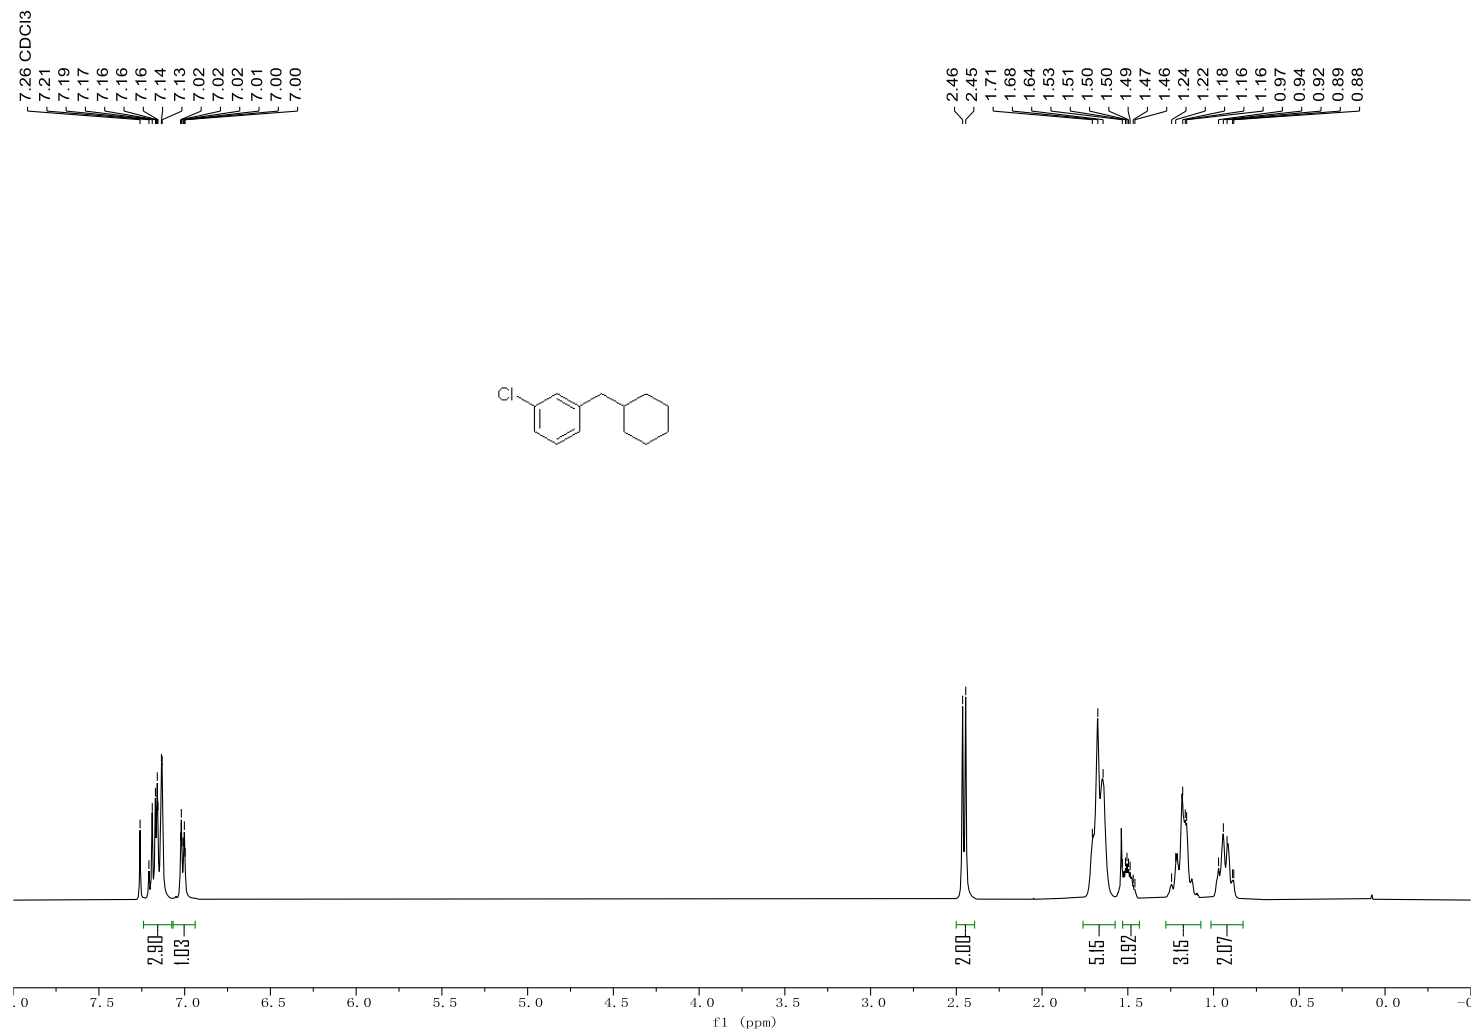



Figure S34  $^{13}\text{C}$  NMR of 3o

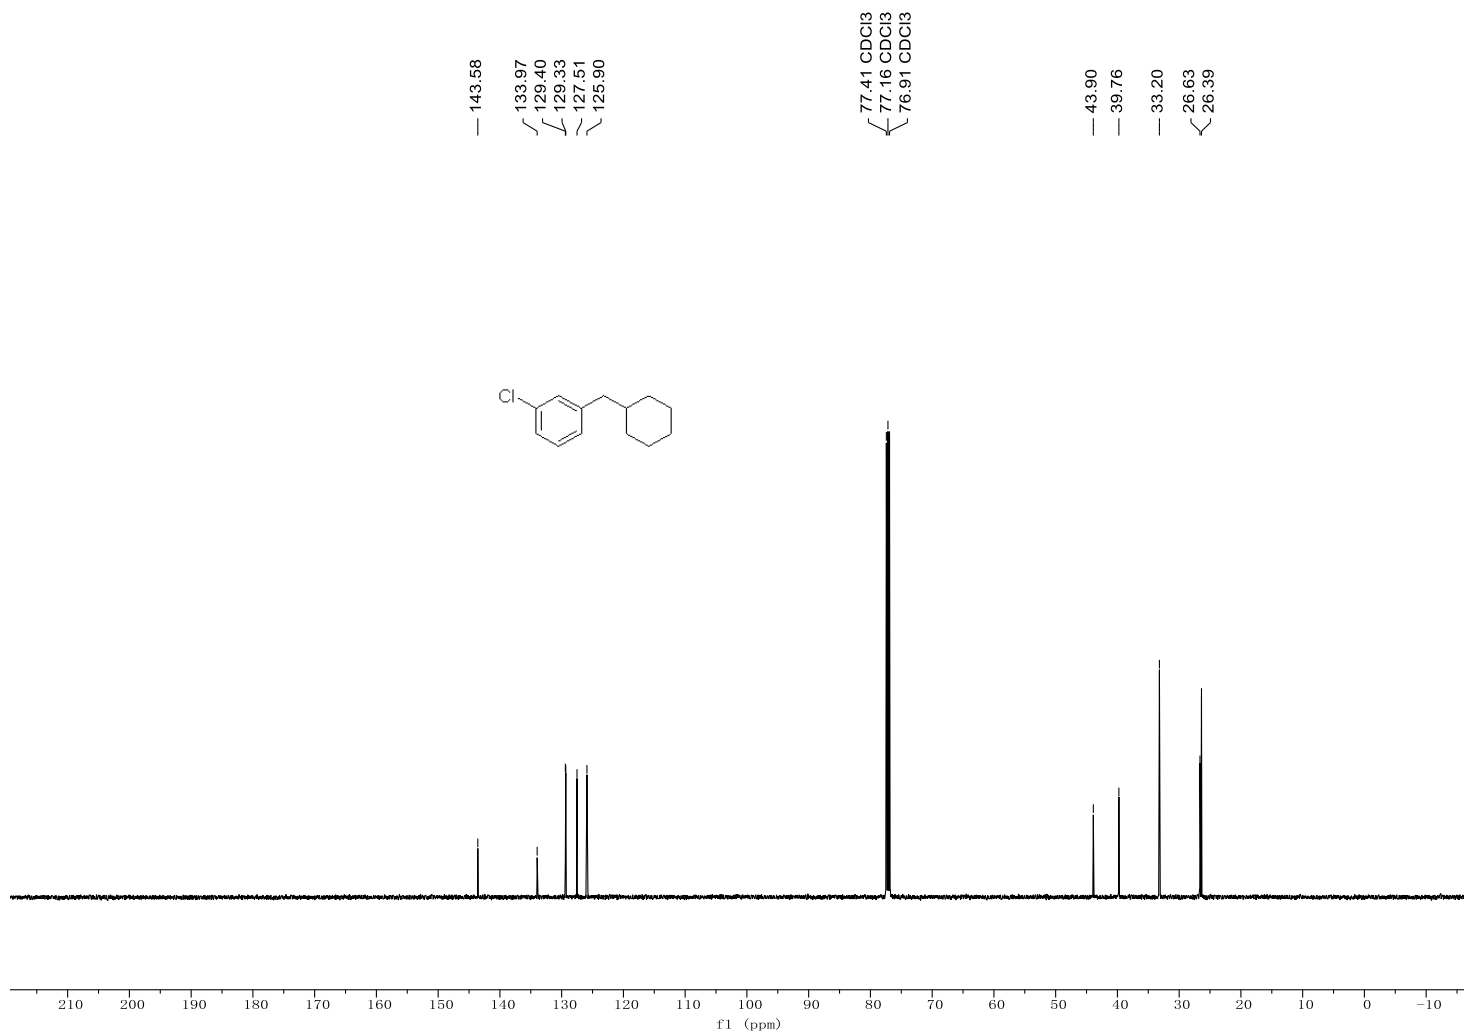

Figure S35  $^1\text{H}$  NMR of 3p

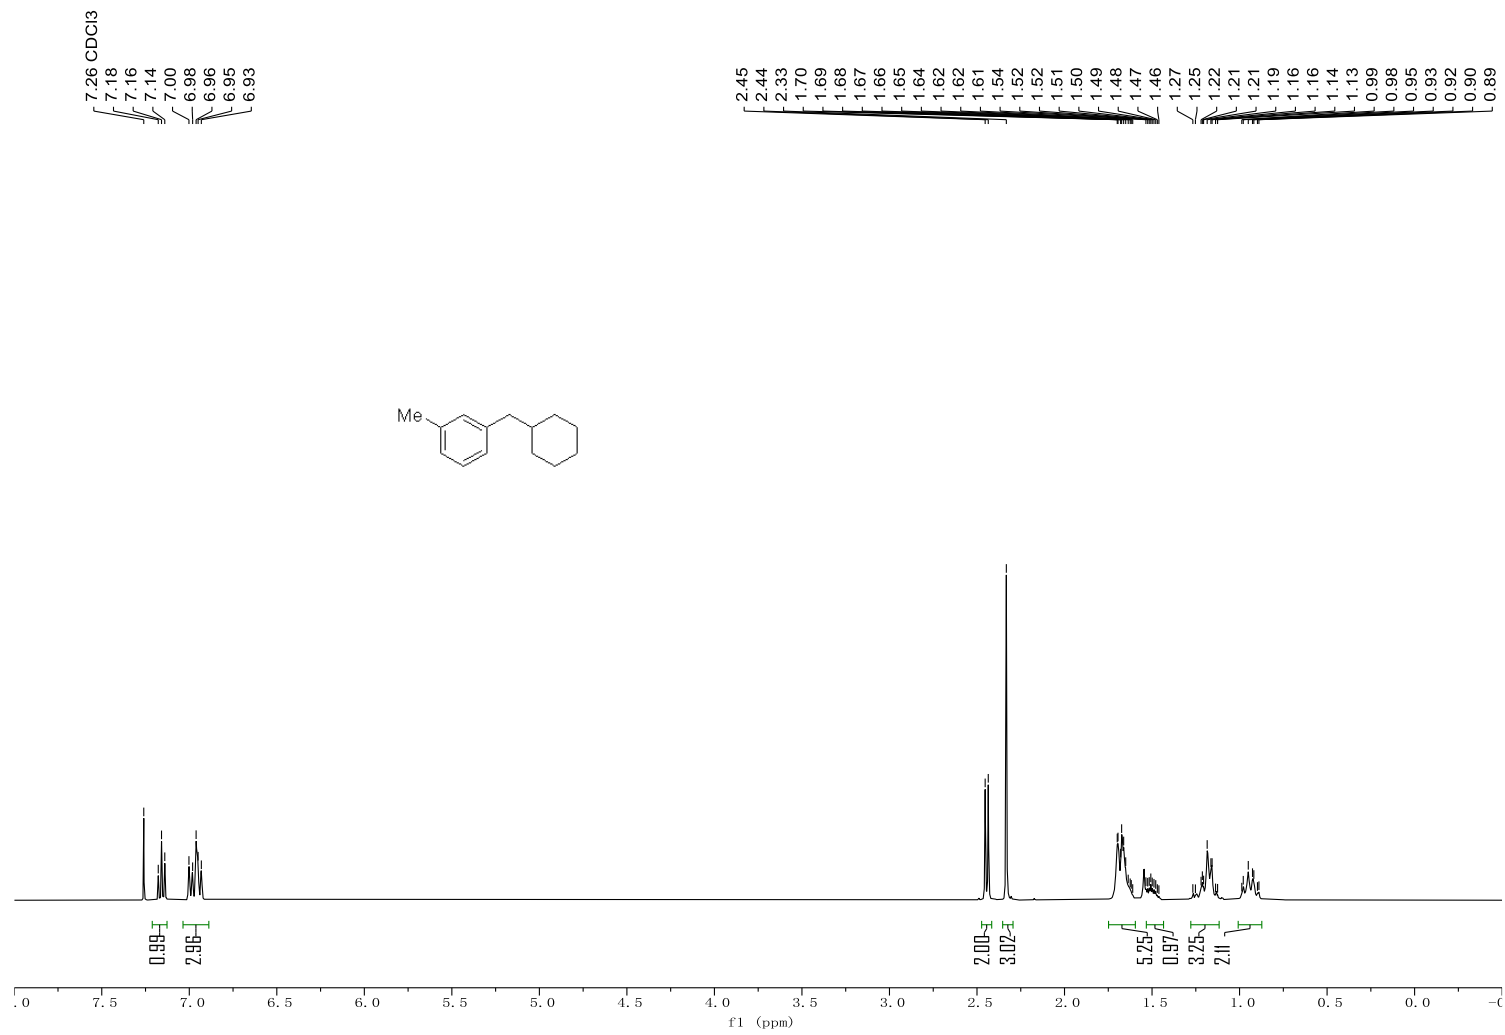

Figure S36  $^{13}\text{C}$  NMR of 3p

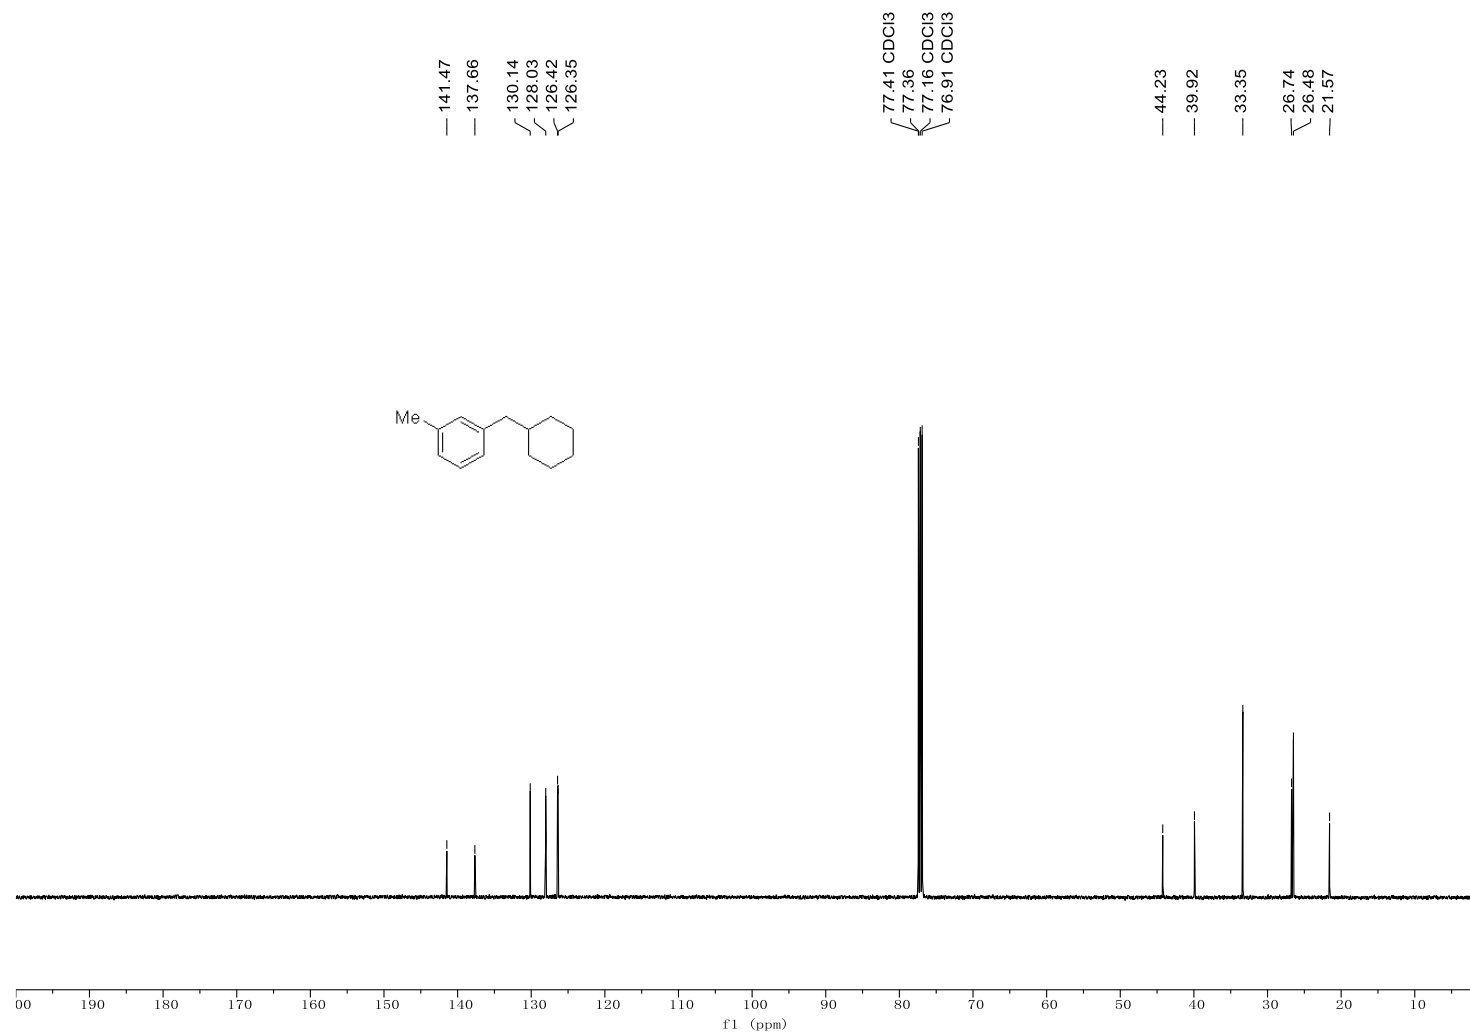

Figure S37  $^1\text{H}$  NMR of 3q

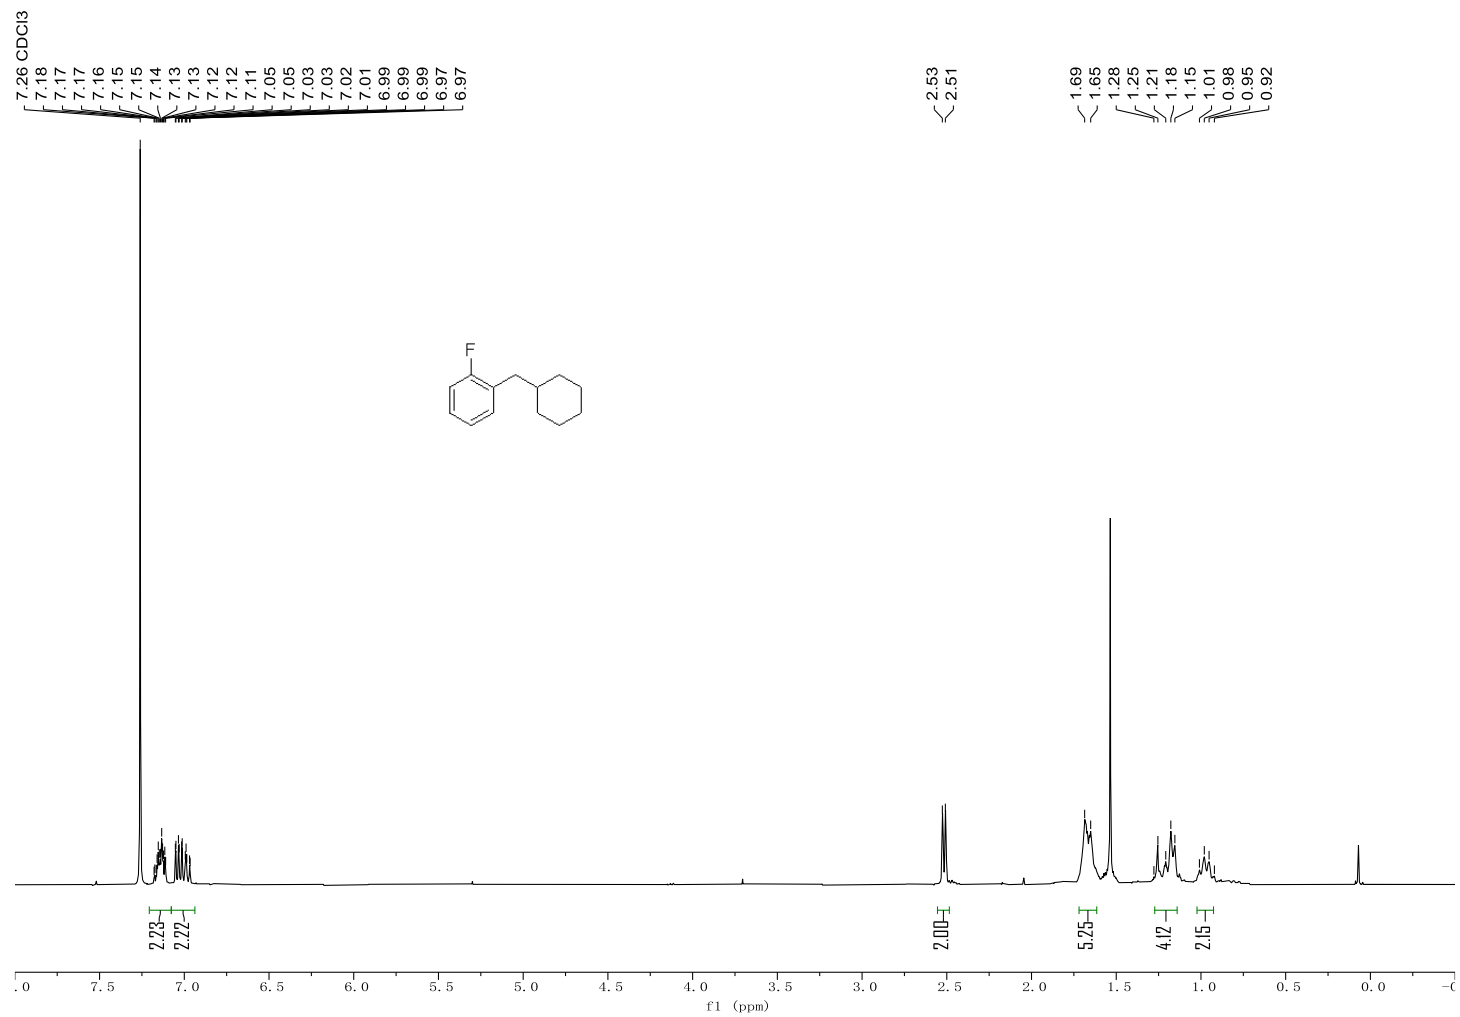

Figure S38  $^{13}\text{C}$  NMR of 3p

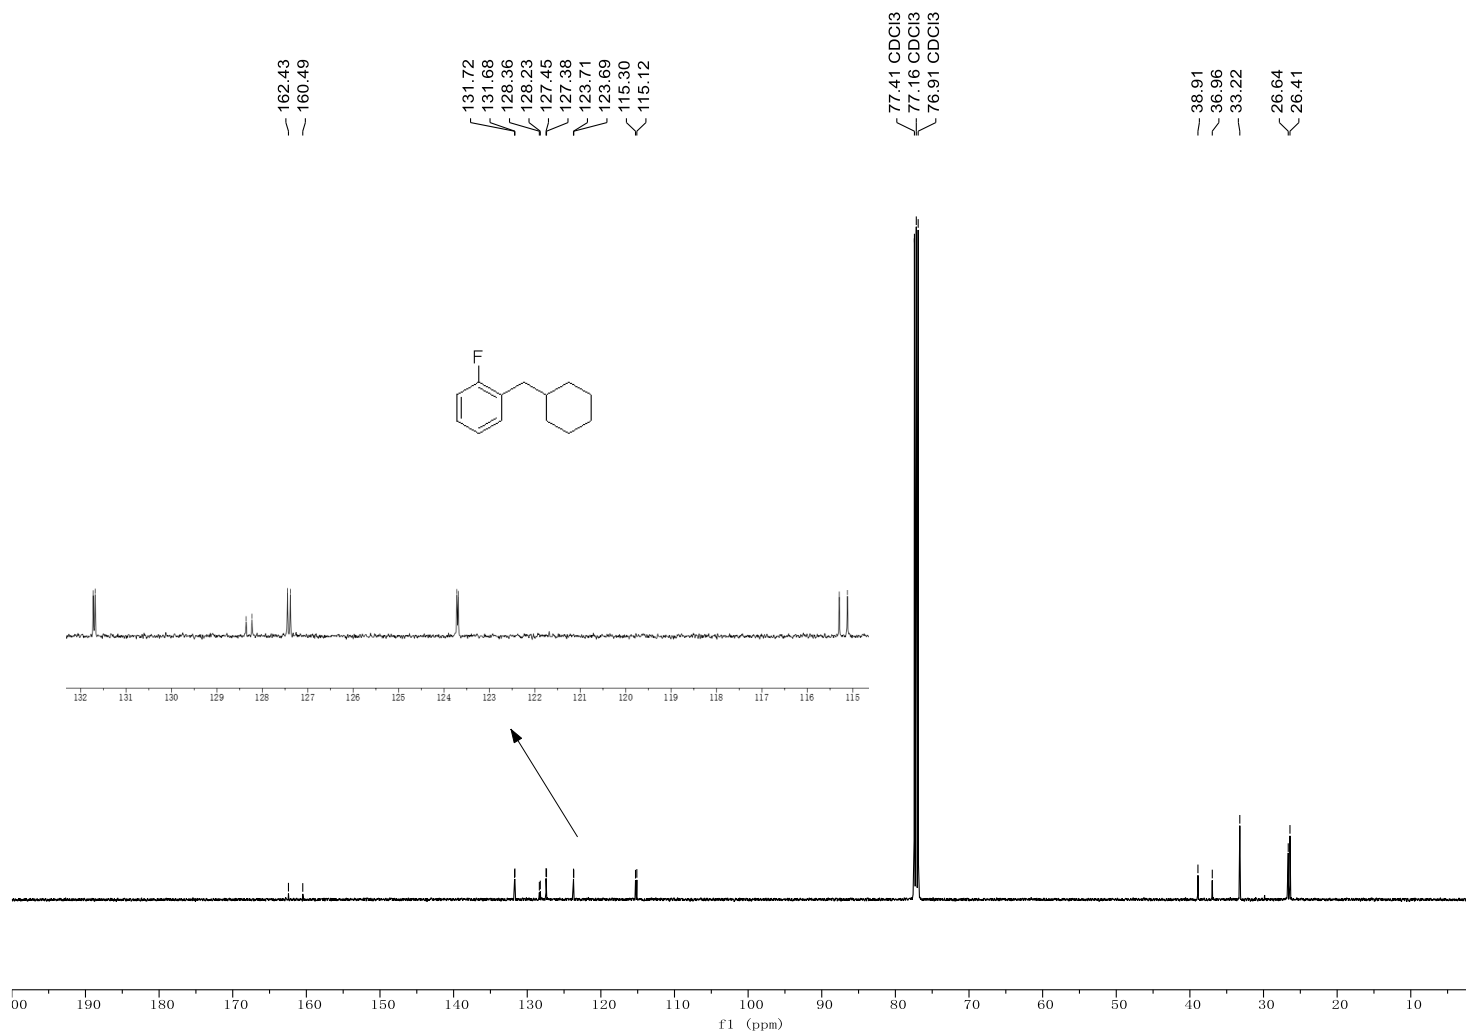

Figure S39  $^{19}\text{F}$  NMR of 3p

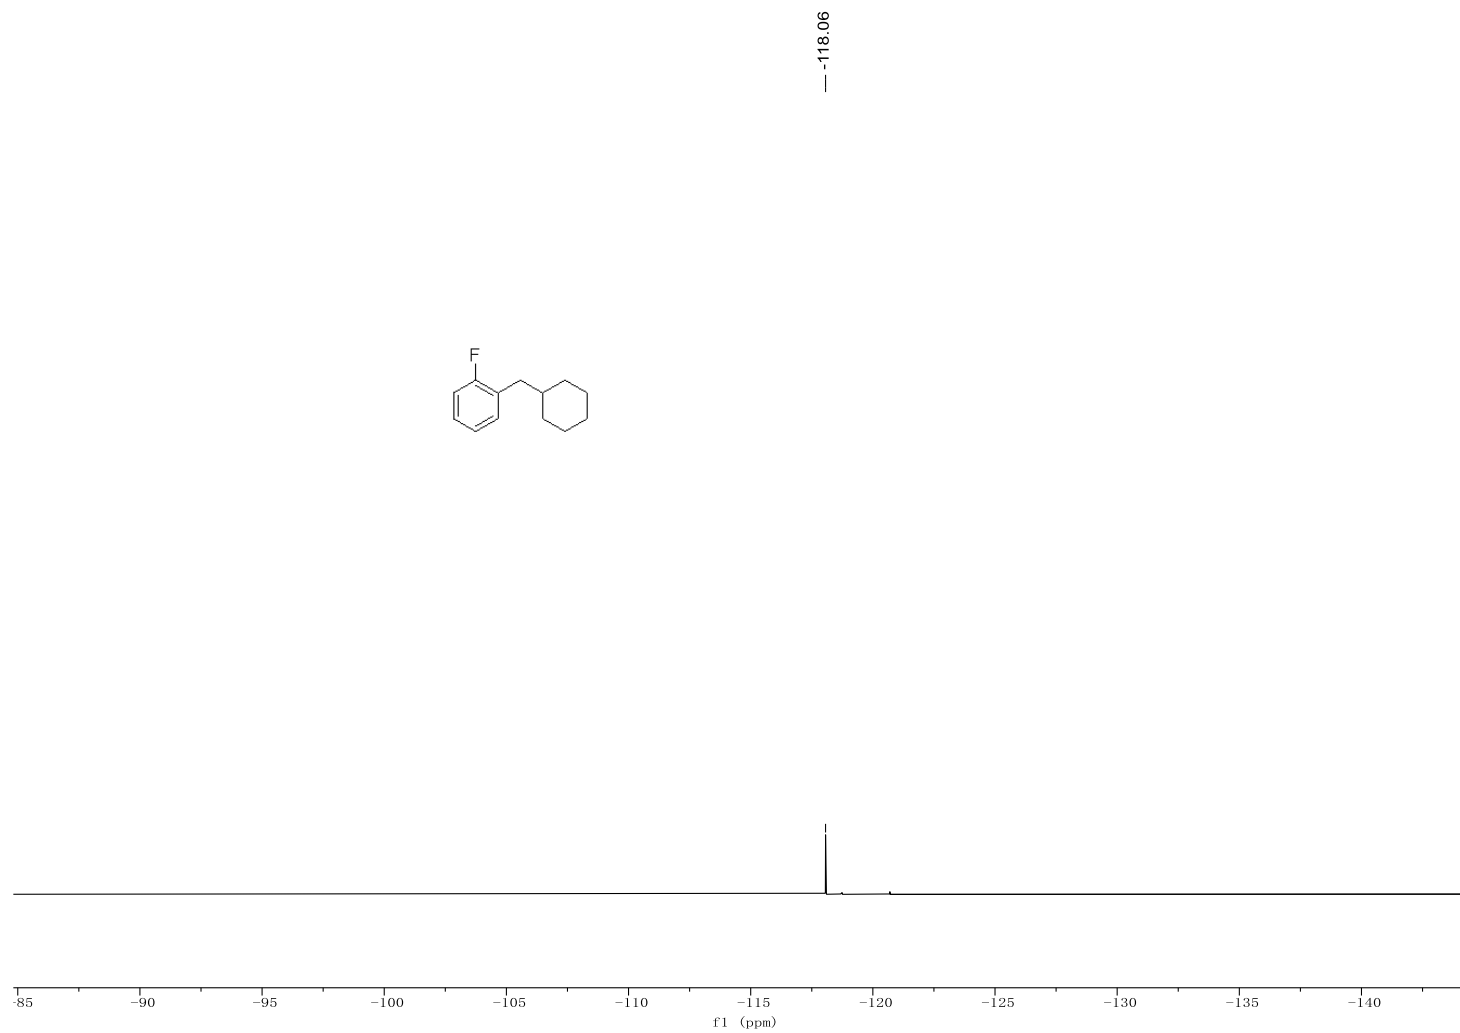

Figure 40  $^1\text{H}$  NMR of 3r

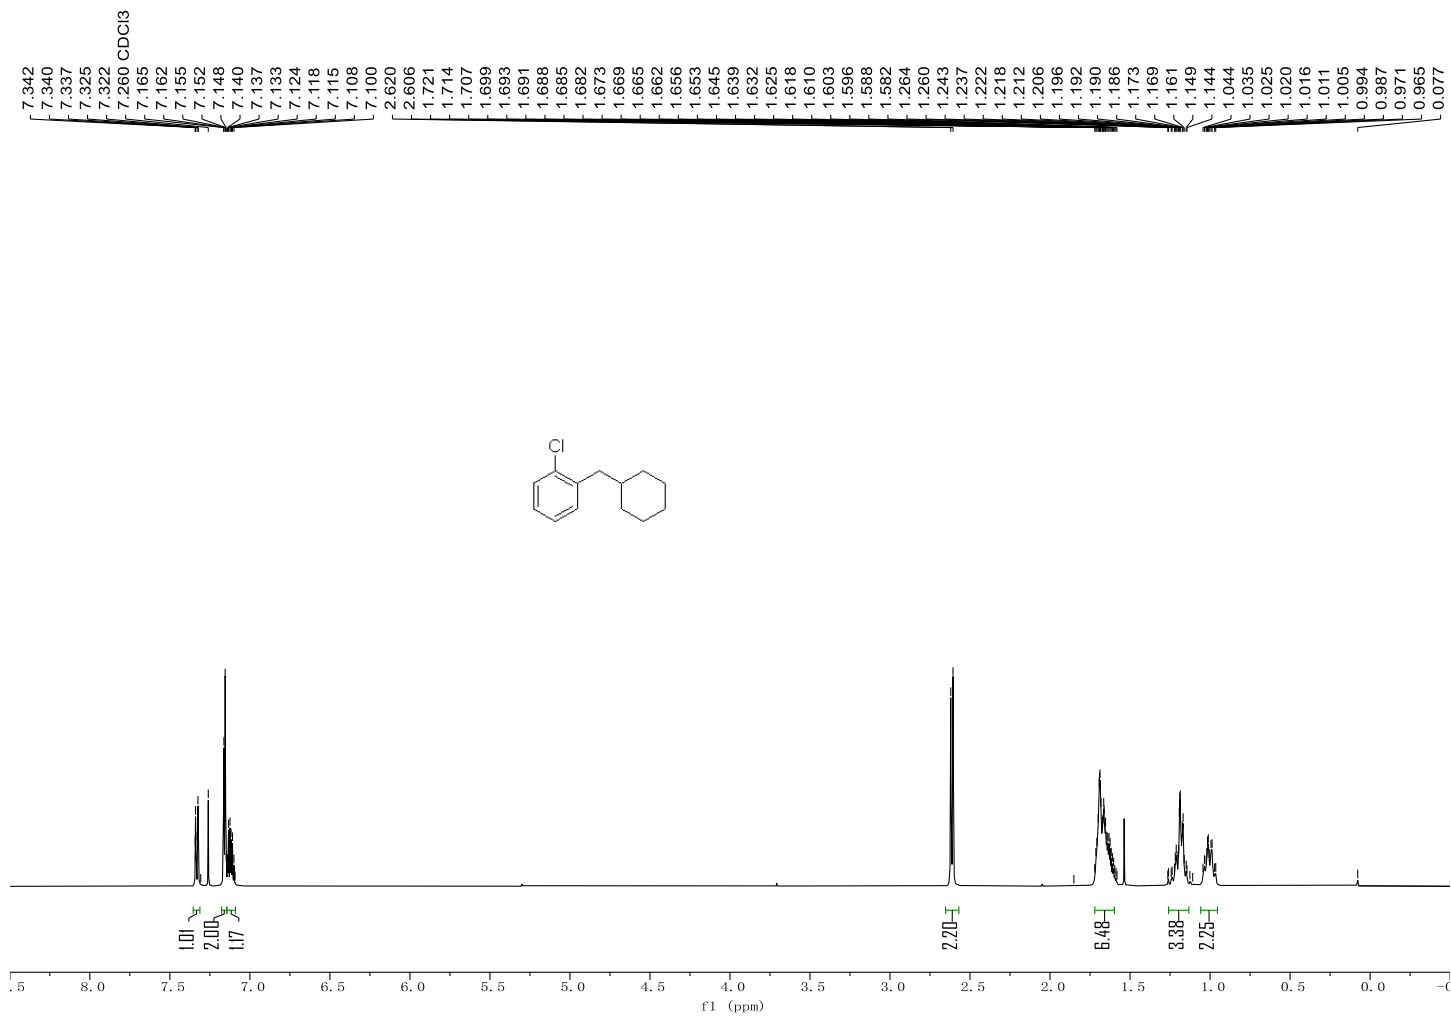

Figure S41  $^{13}\text{C}$  NMR of 3r

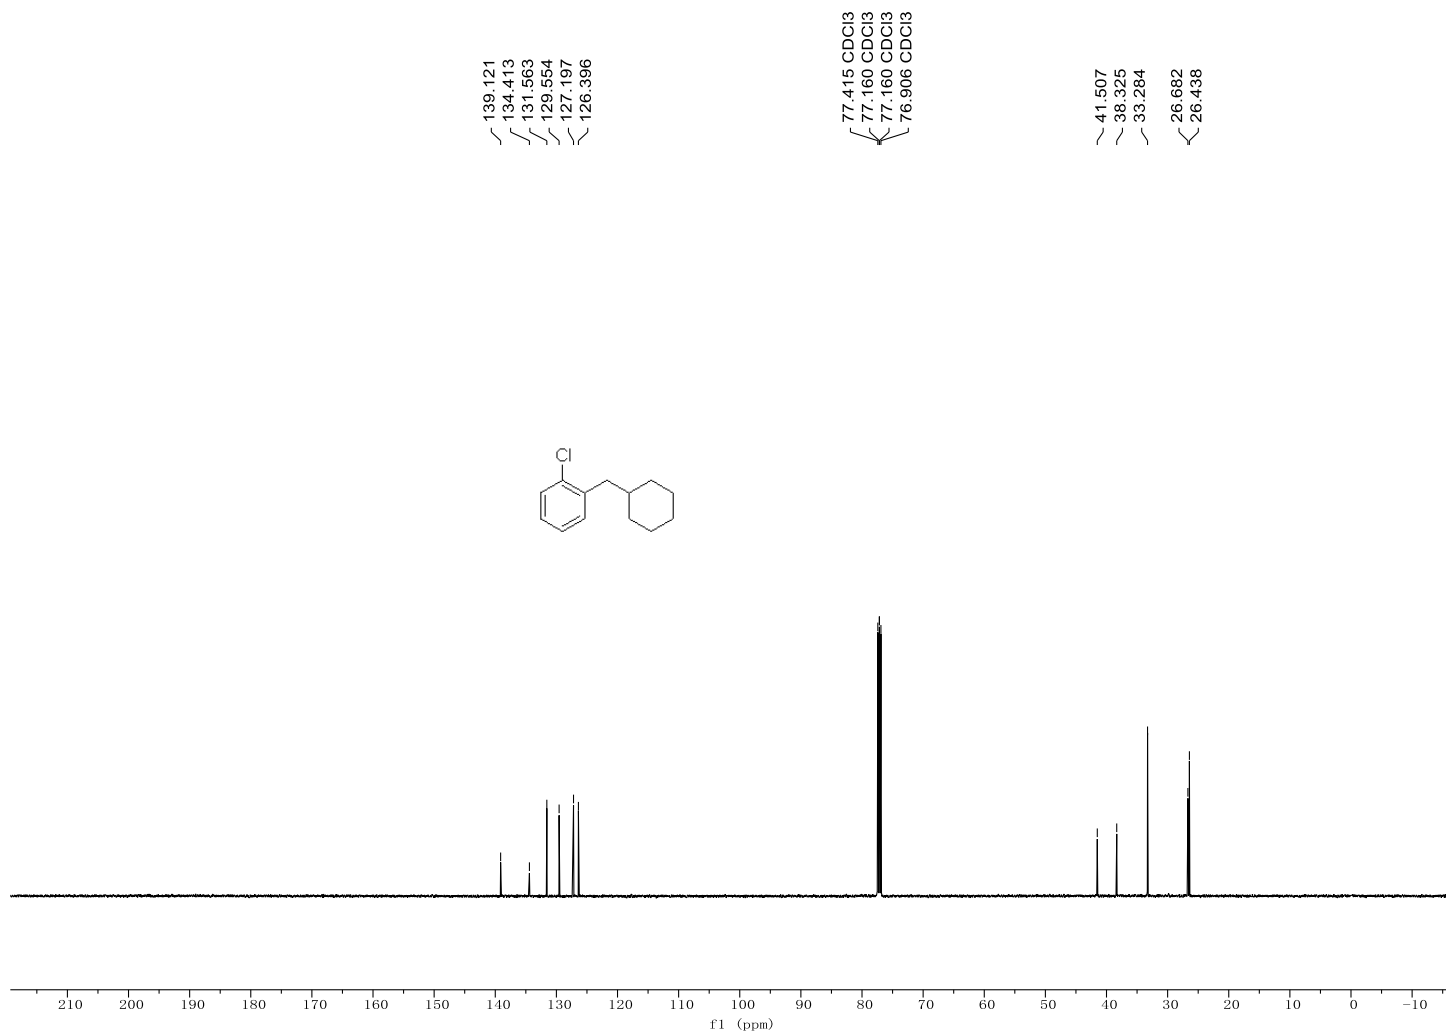



Figure S42  $^1\text{H}$  NMR of 3s

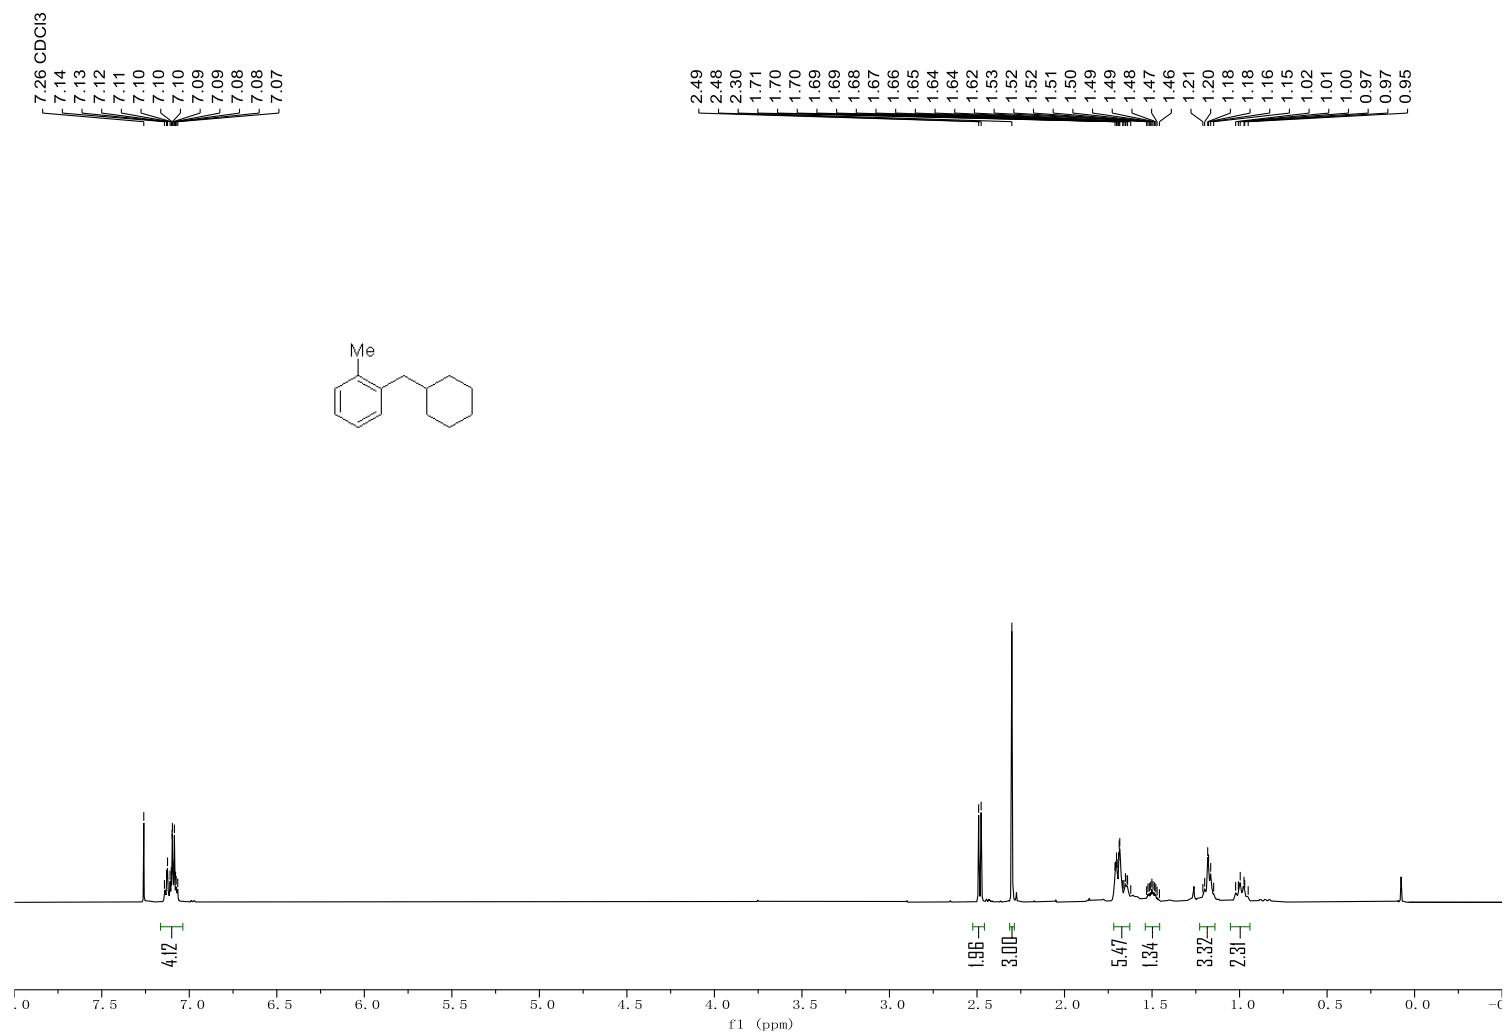

Figure S43  $^{13}\text{C}$  NMR of 3s

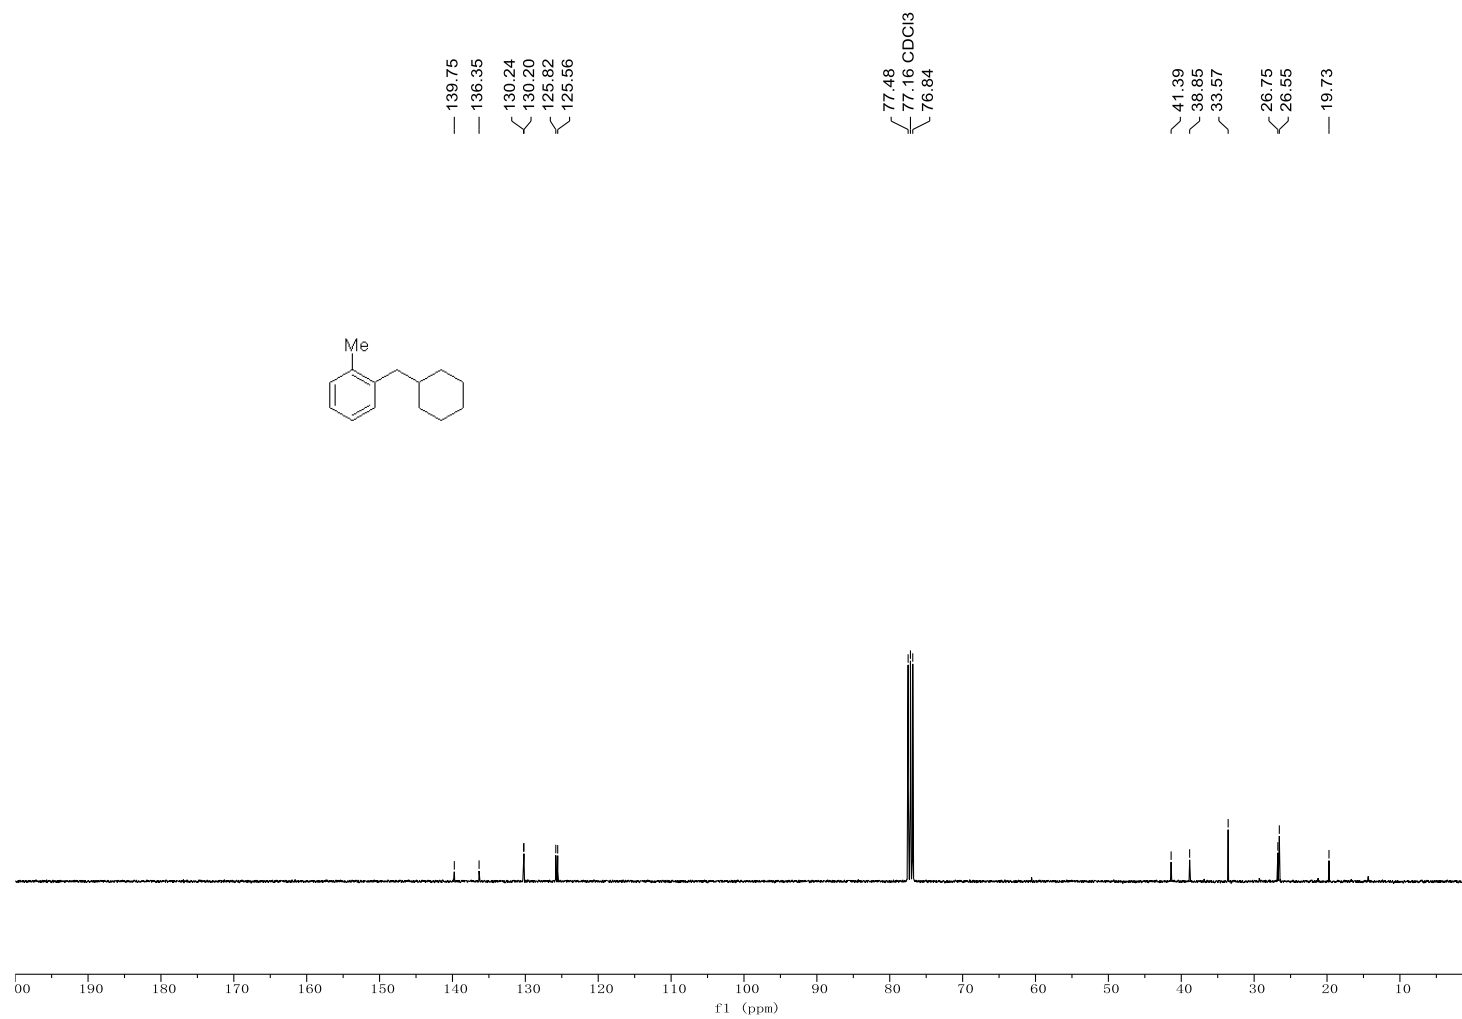

Figure S44  $^1\text{H}$  NMR of 3t

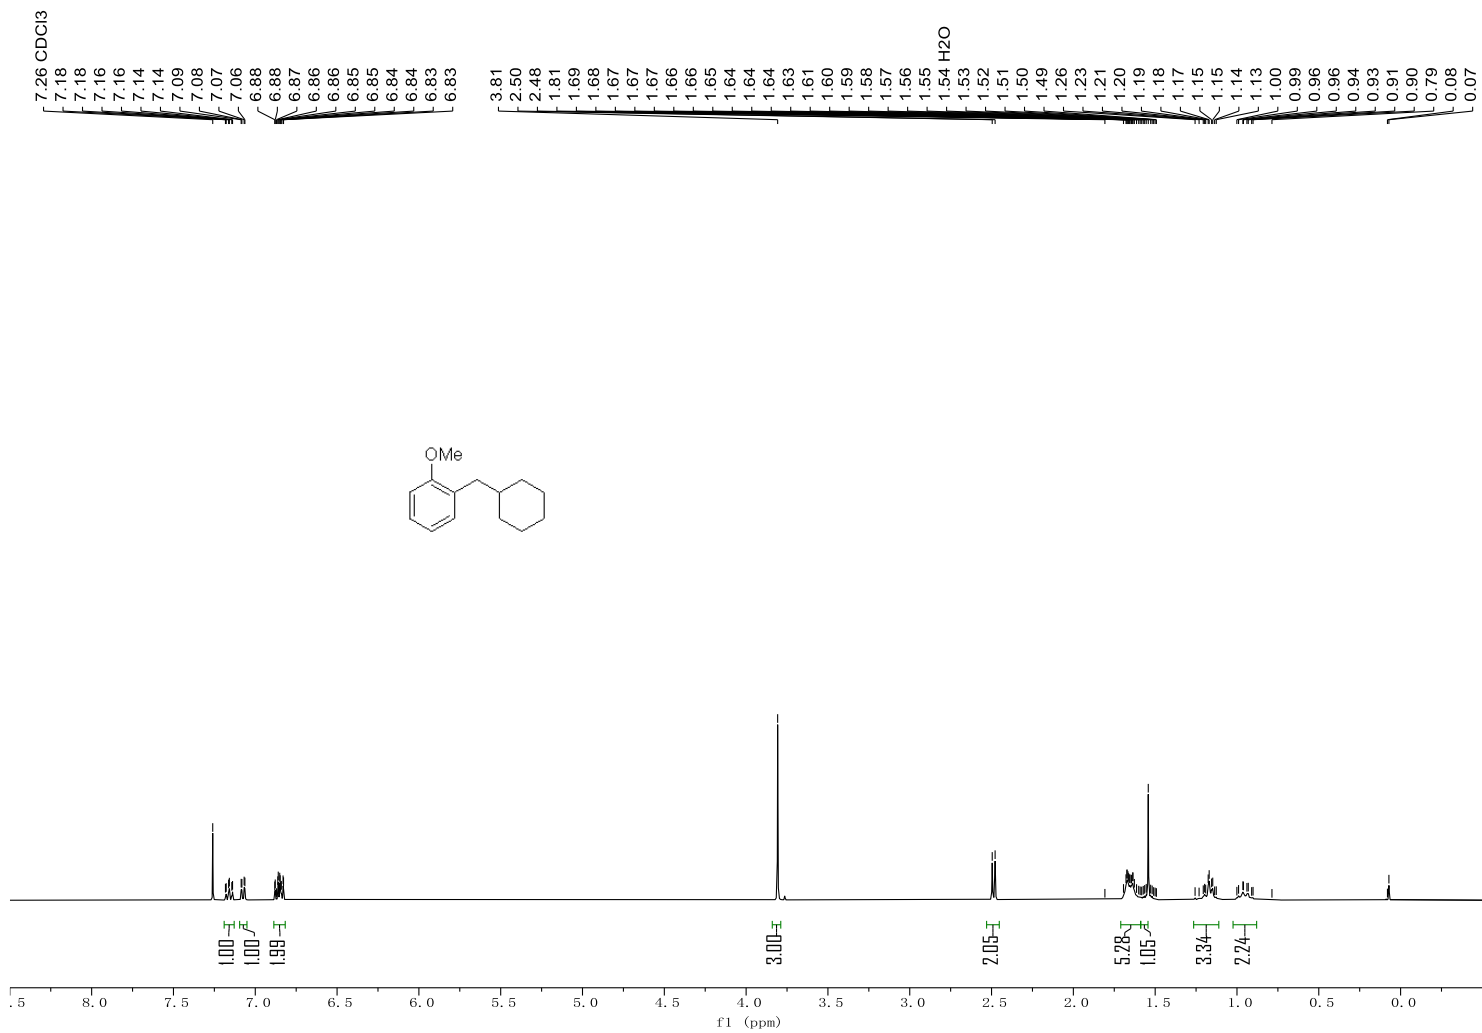

**Figure S45**  $^{13}\text{C}$  NMR of **3t**

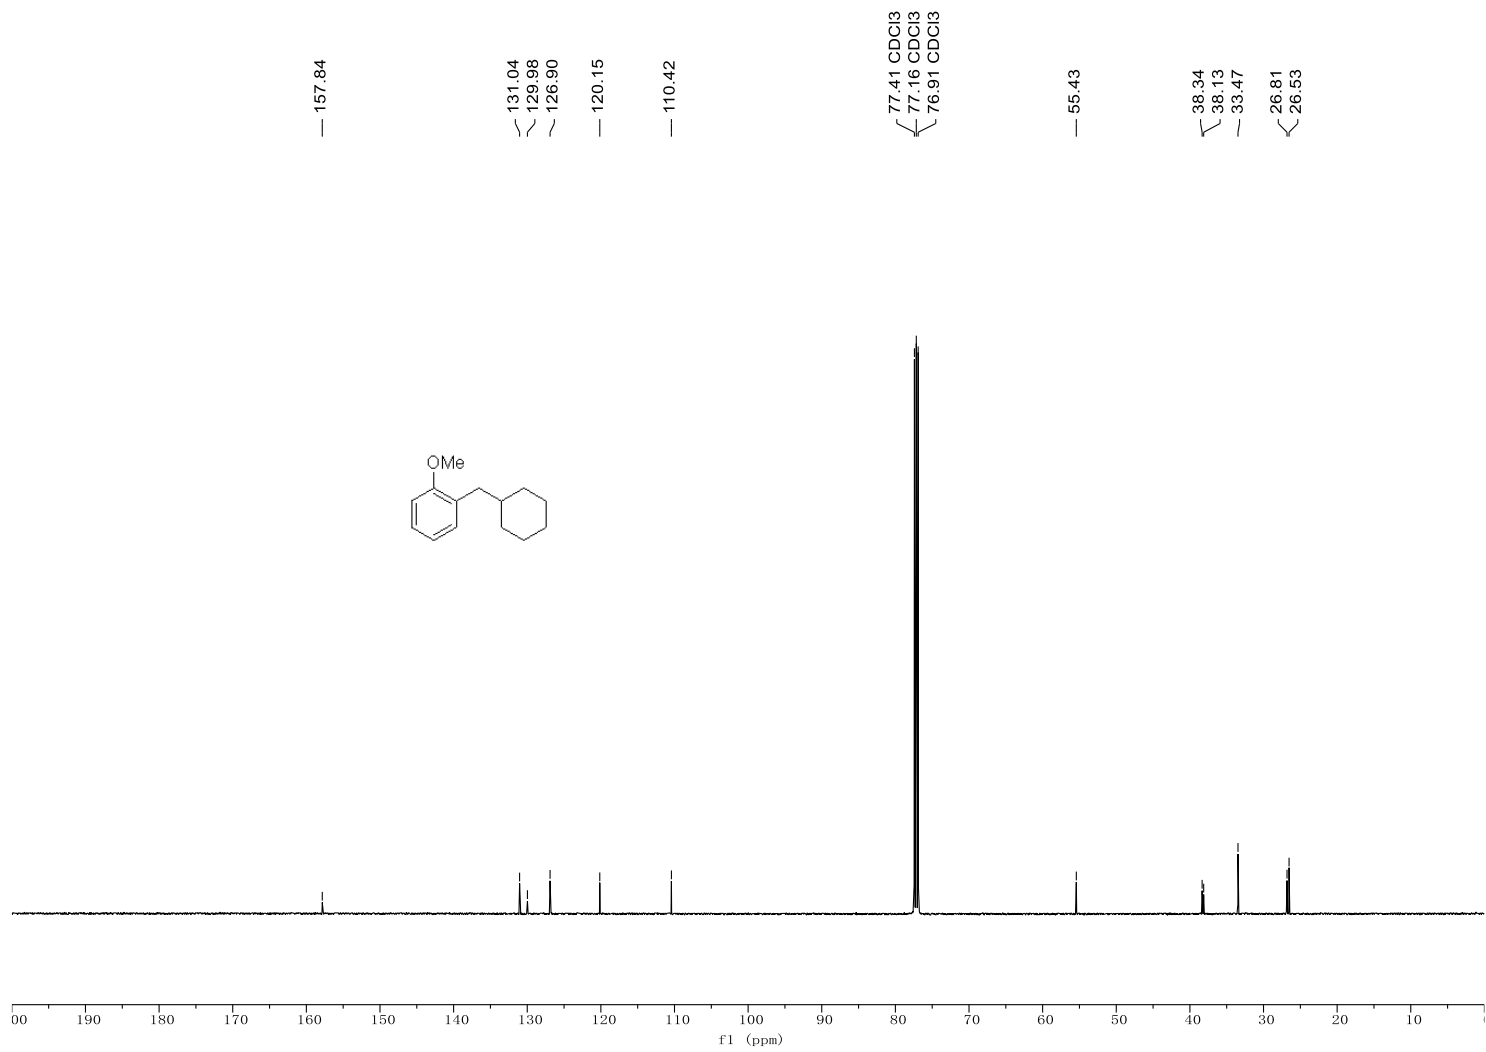

Figure S46 <sup>1</sup>H NMR of 3u

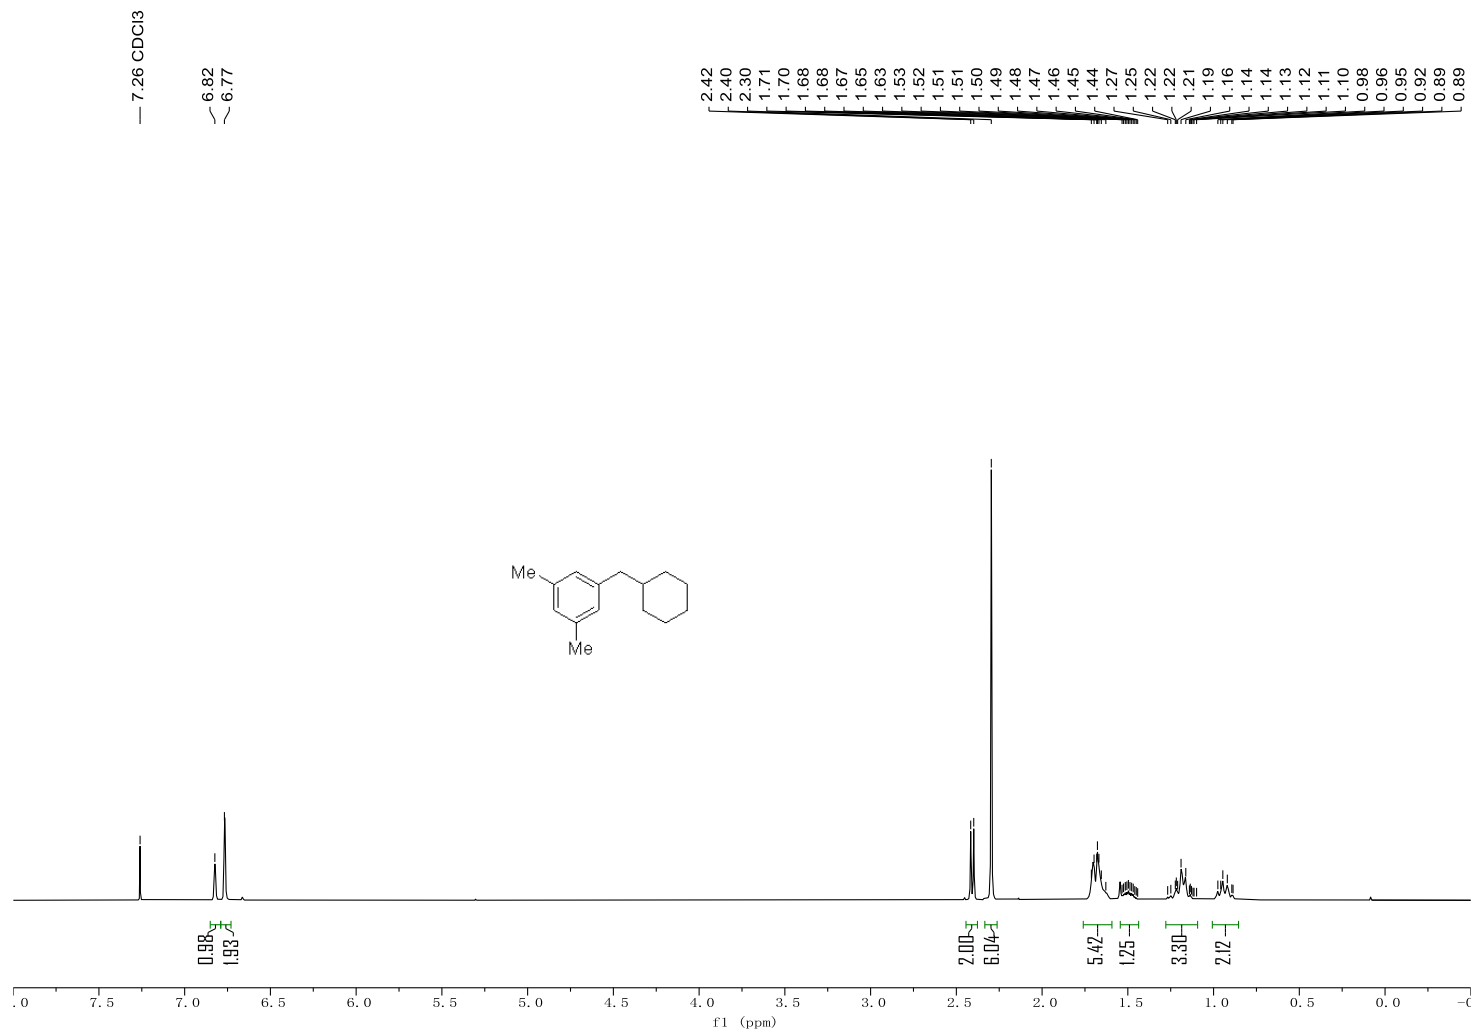

Figure S47  $^{13}\text{C}$  NMR of 3u

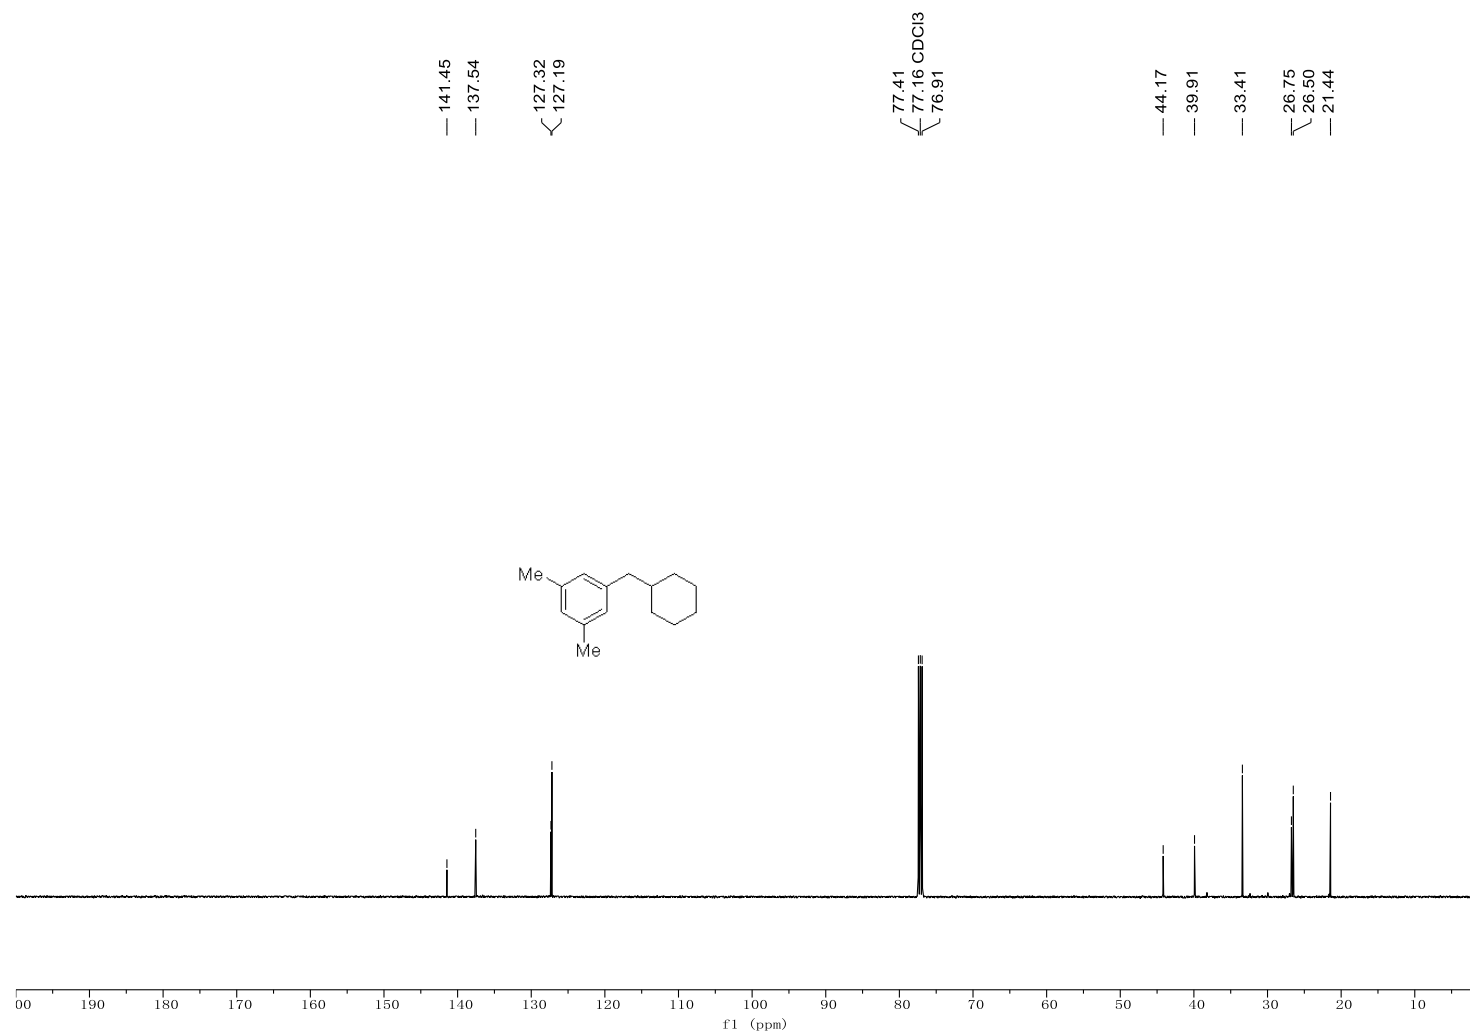

Figure S48  $^1\text{H}$  NMR of **3v**

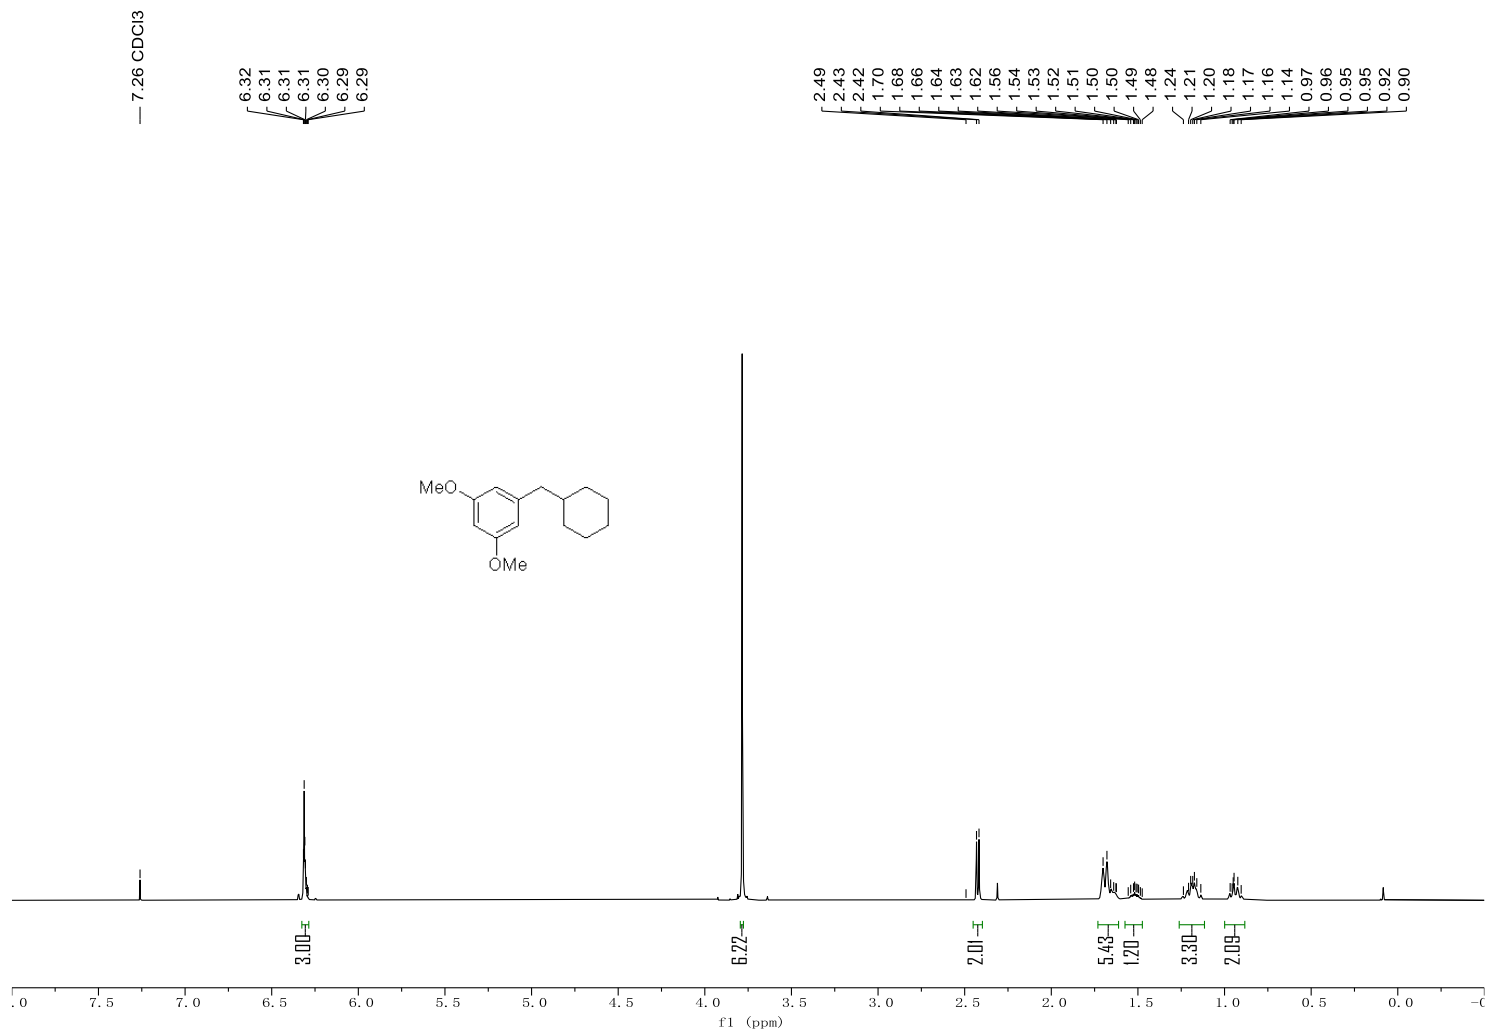



Figure S49  $^{13}\text{C}$  NMR of 3v

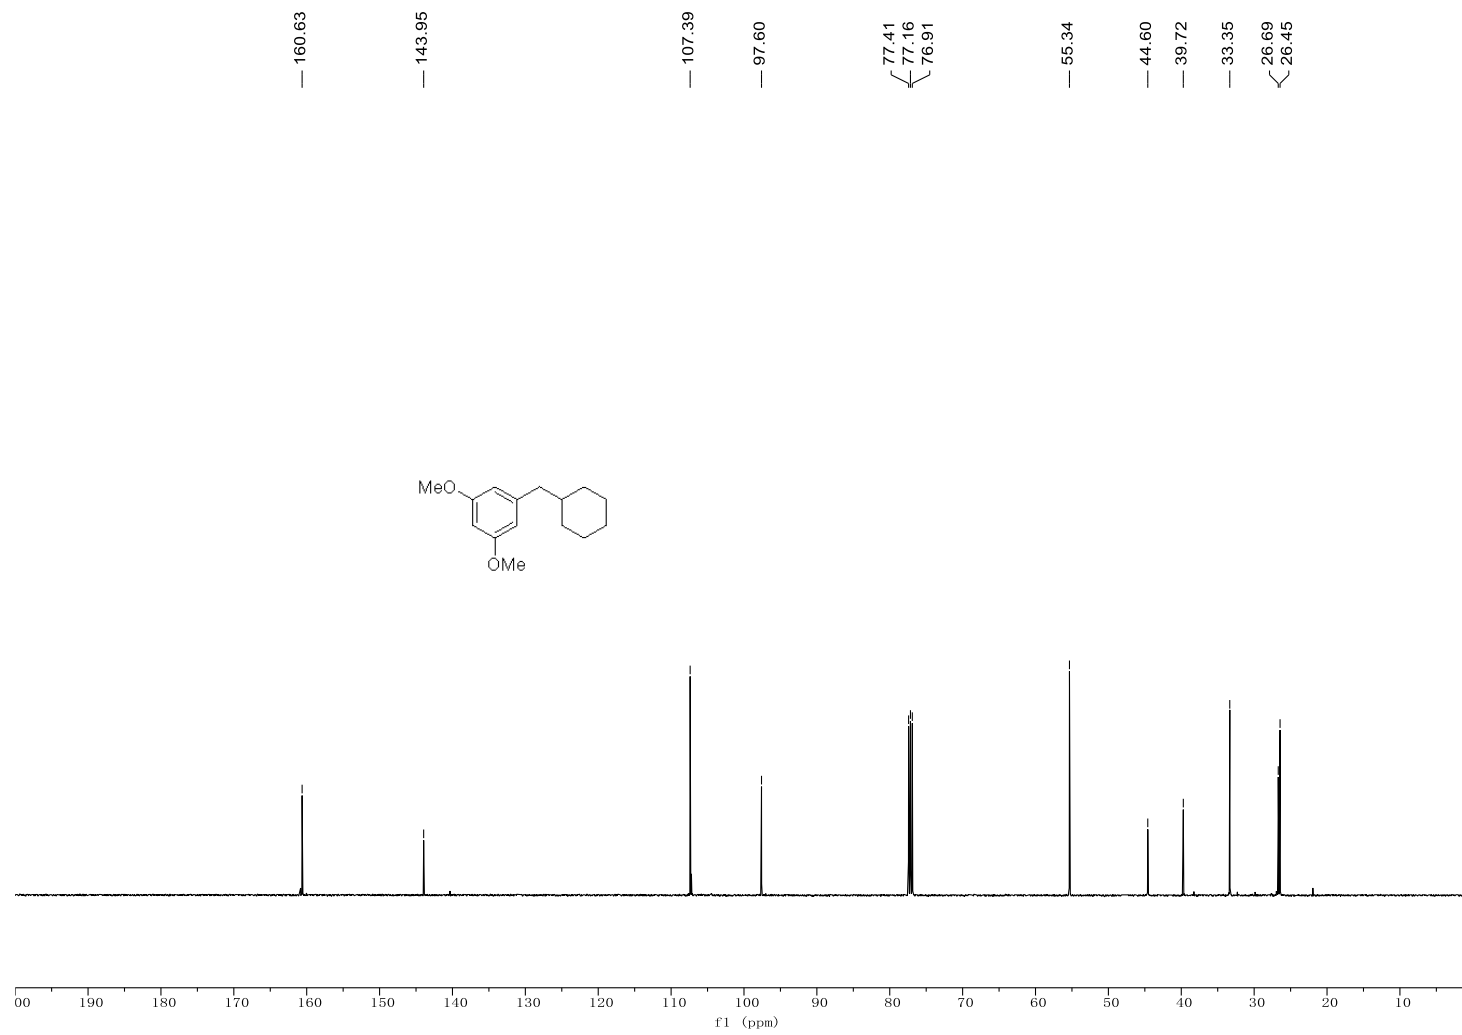

Figure S50  $^1\text{H}$  NMR of 3w

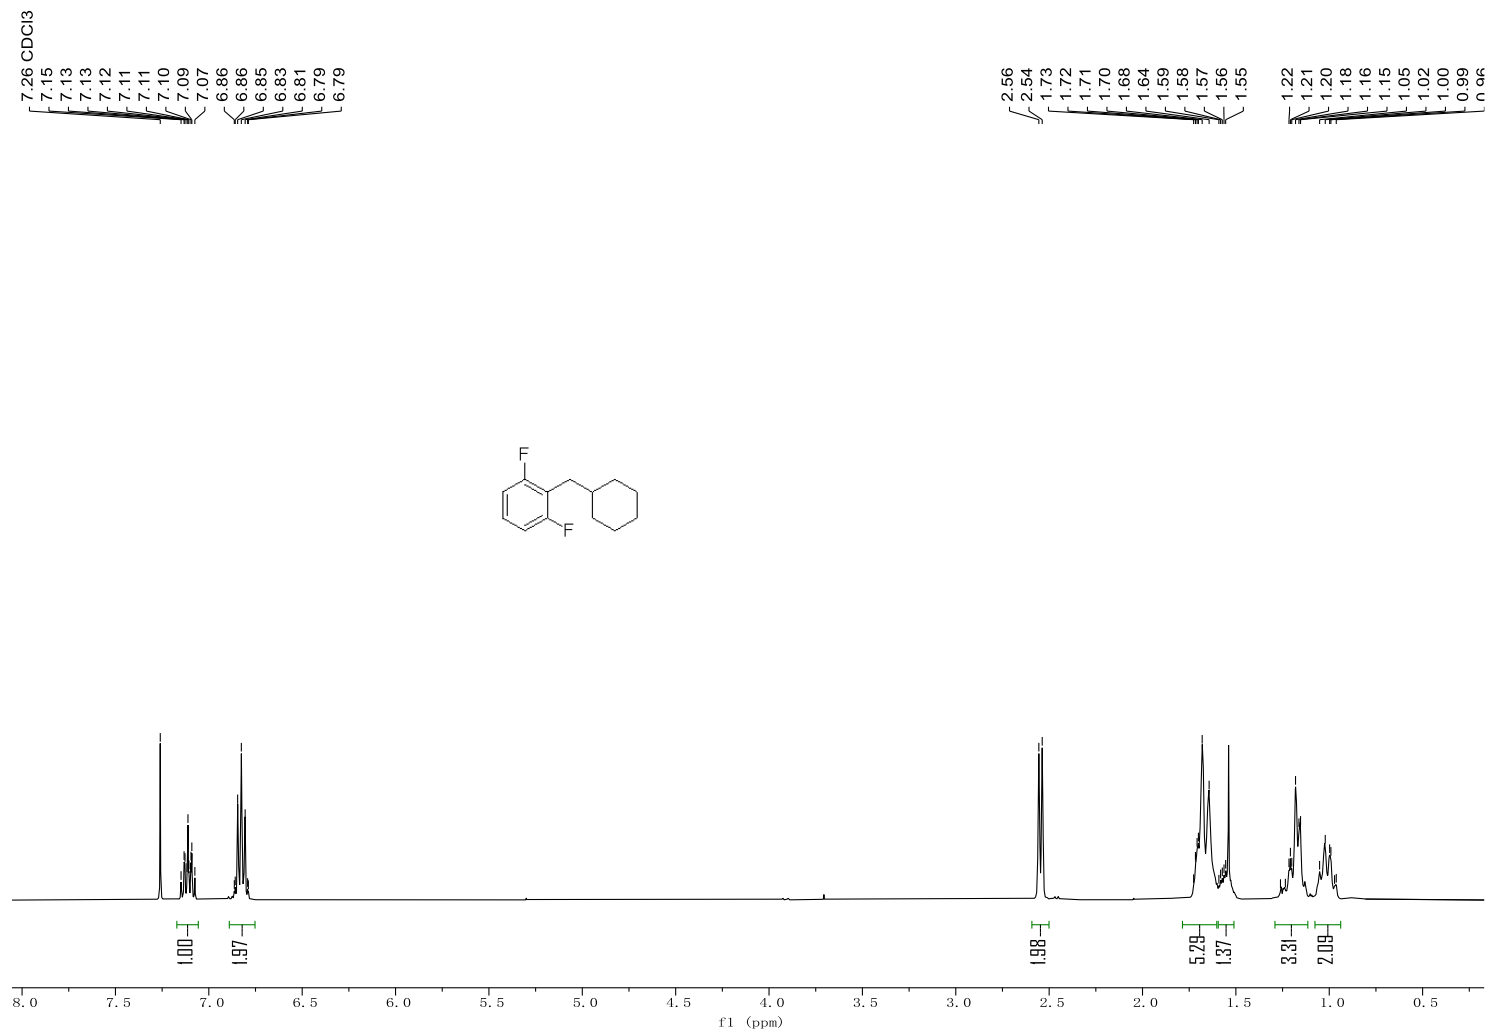

Figure S51  $^{13}\text{C}$  NMR of 3w

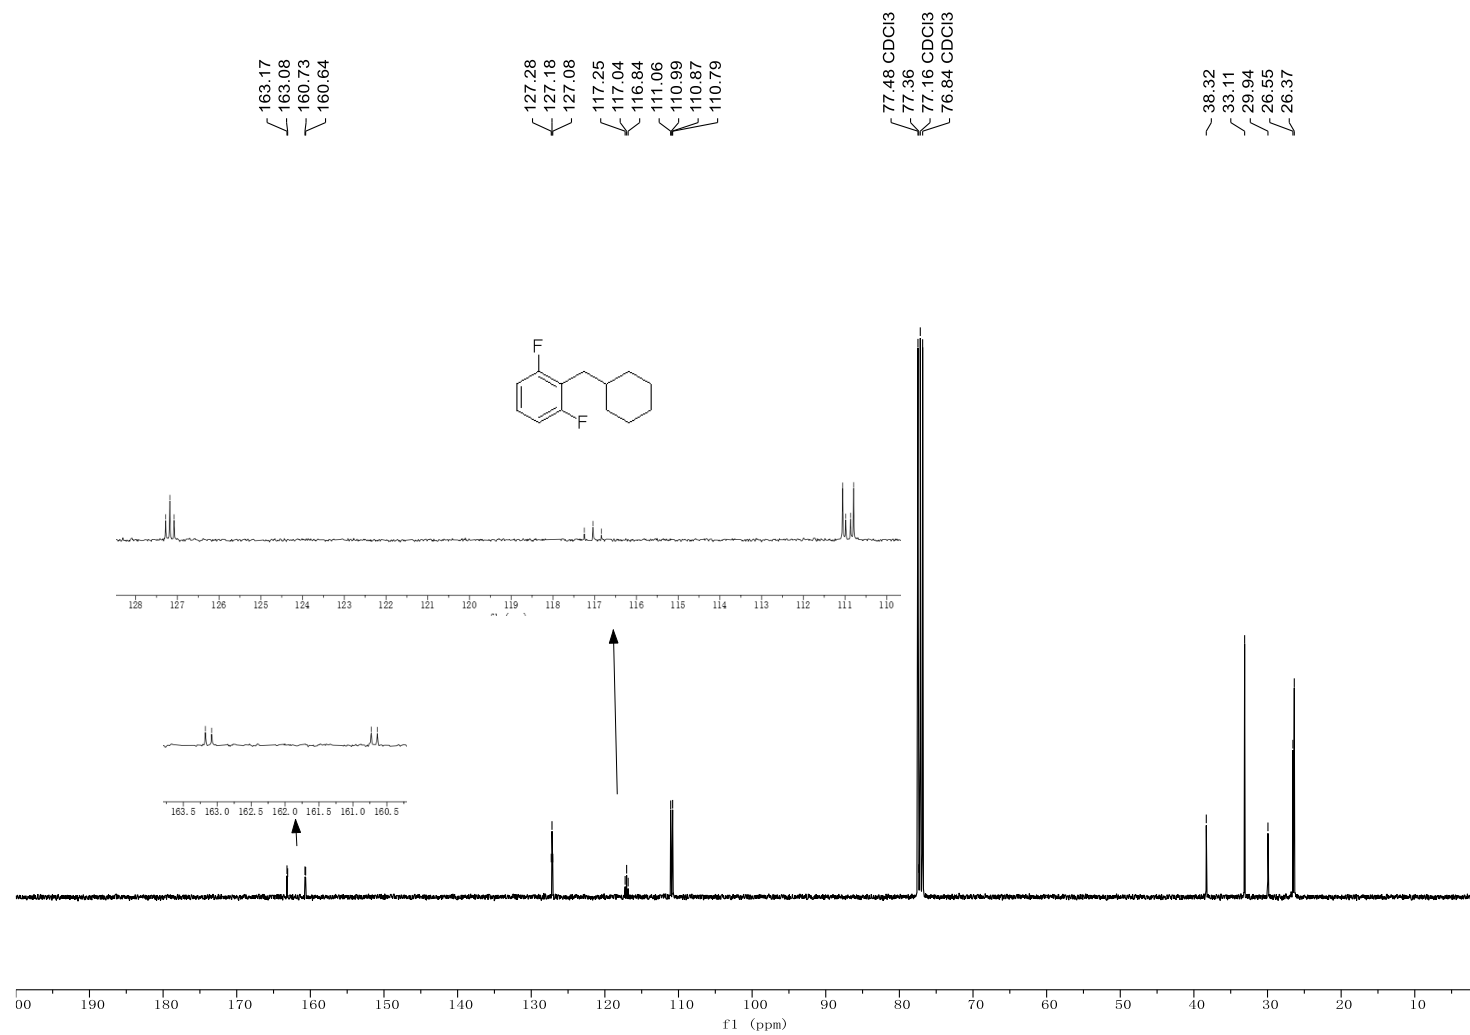

Figure S52  $^{19}\text{F}$  NMR of 3w

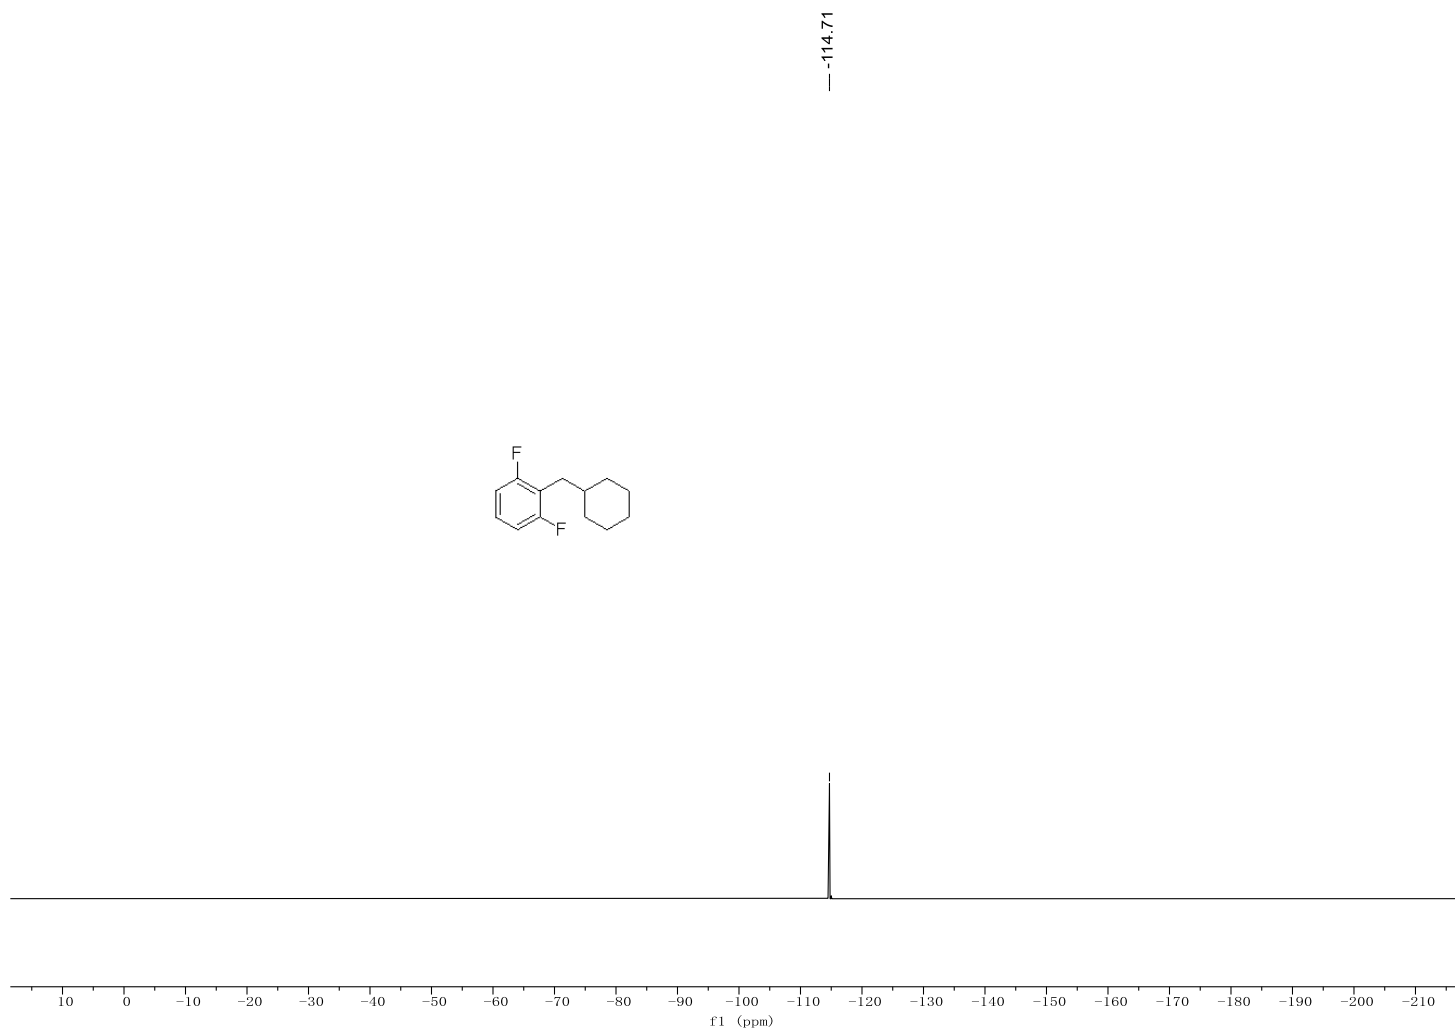

Figure S53  $^1\text{H}$  NMR of 3x

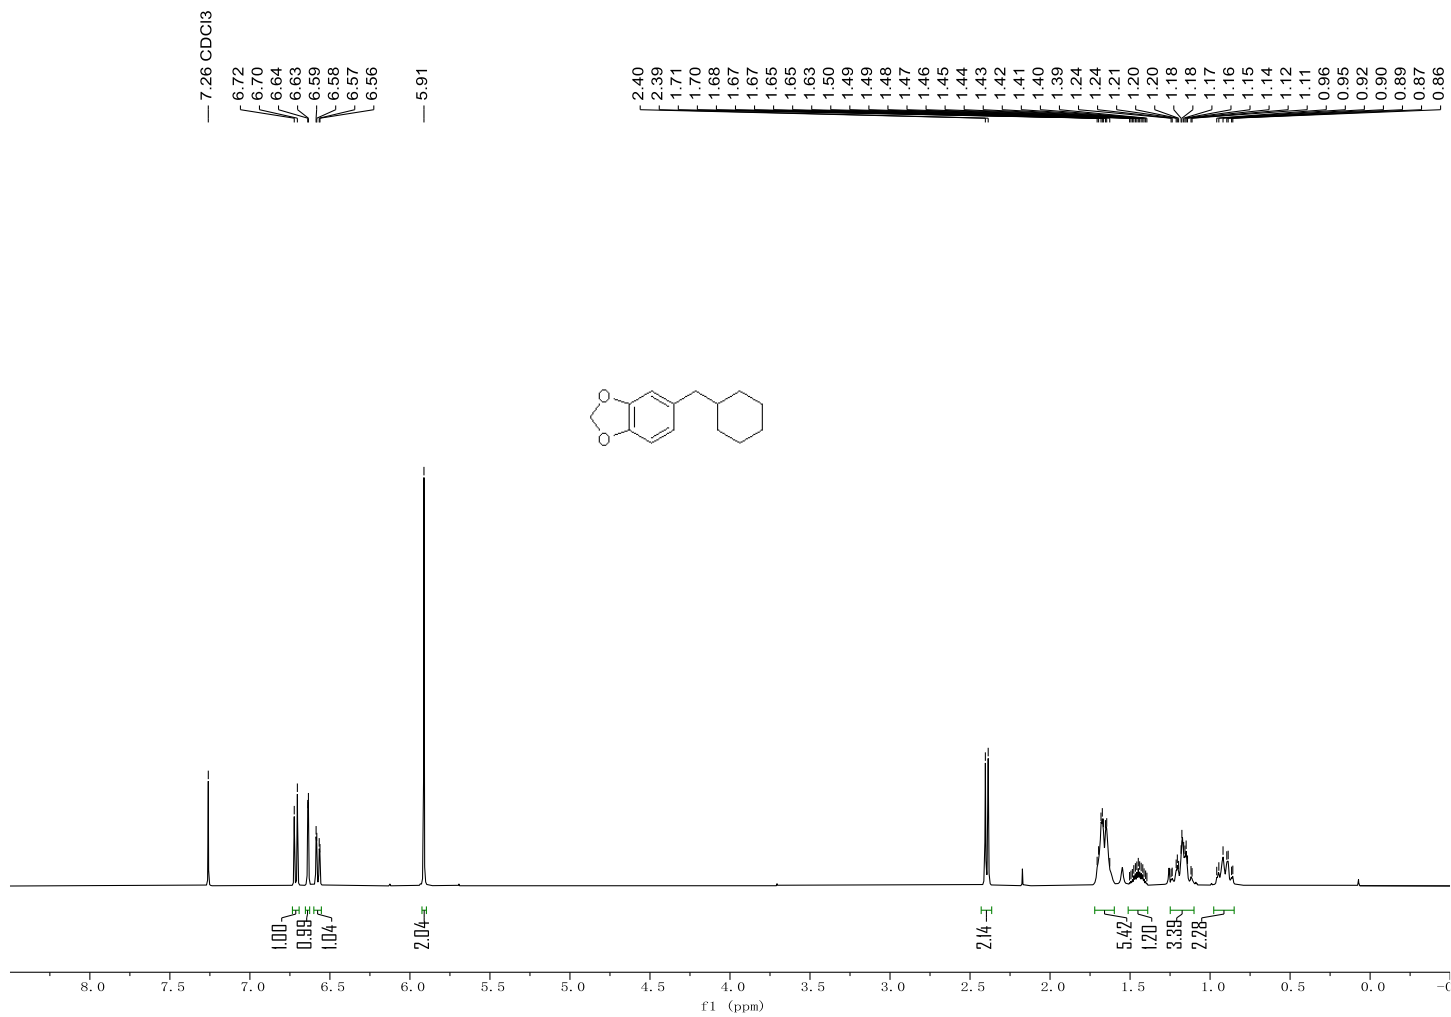

Figure S54  $^{13}\text{C}$  NMR of 3x

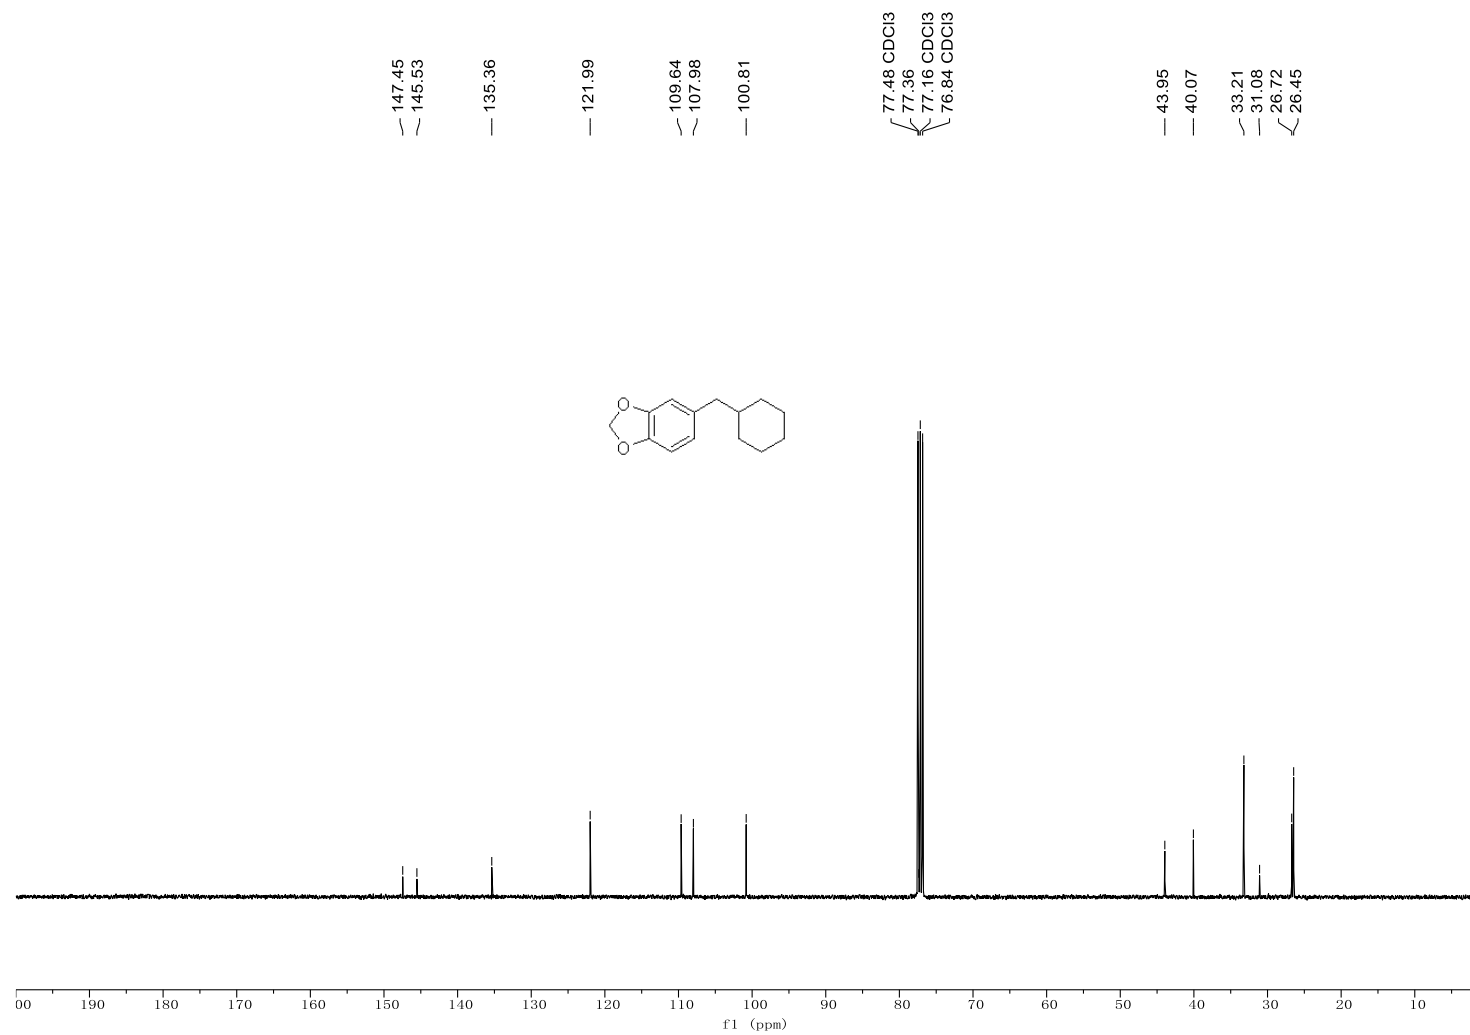

Figure S55  $^1\text{H}$  NMR of 3y

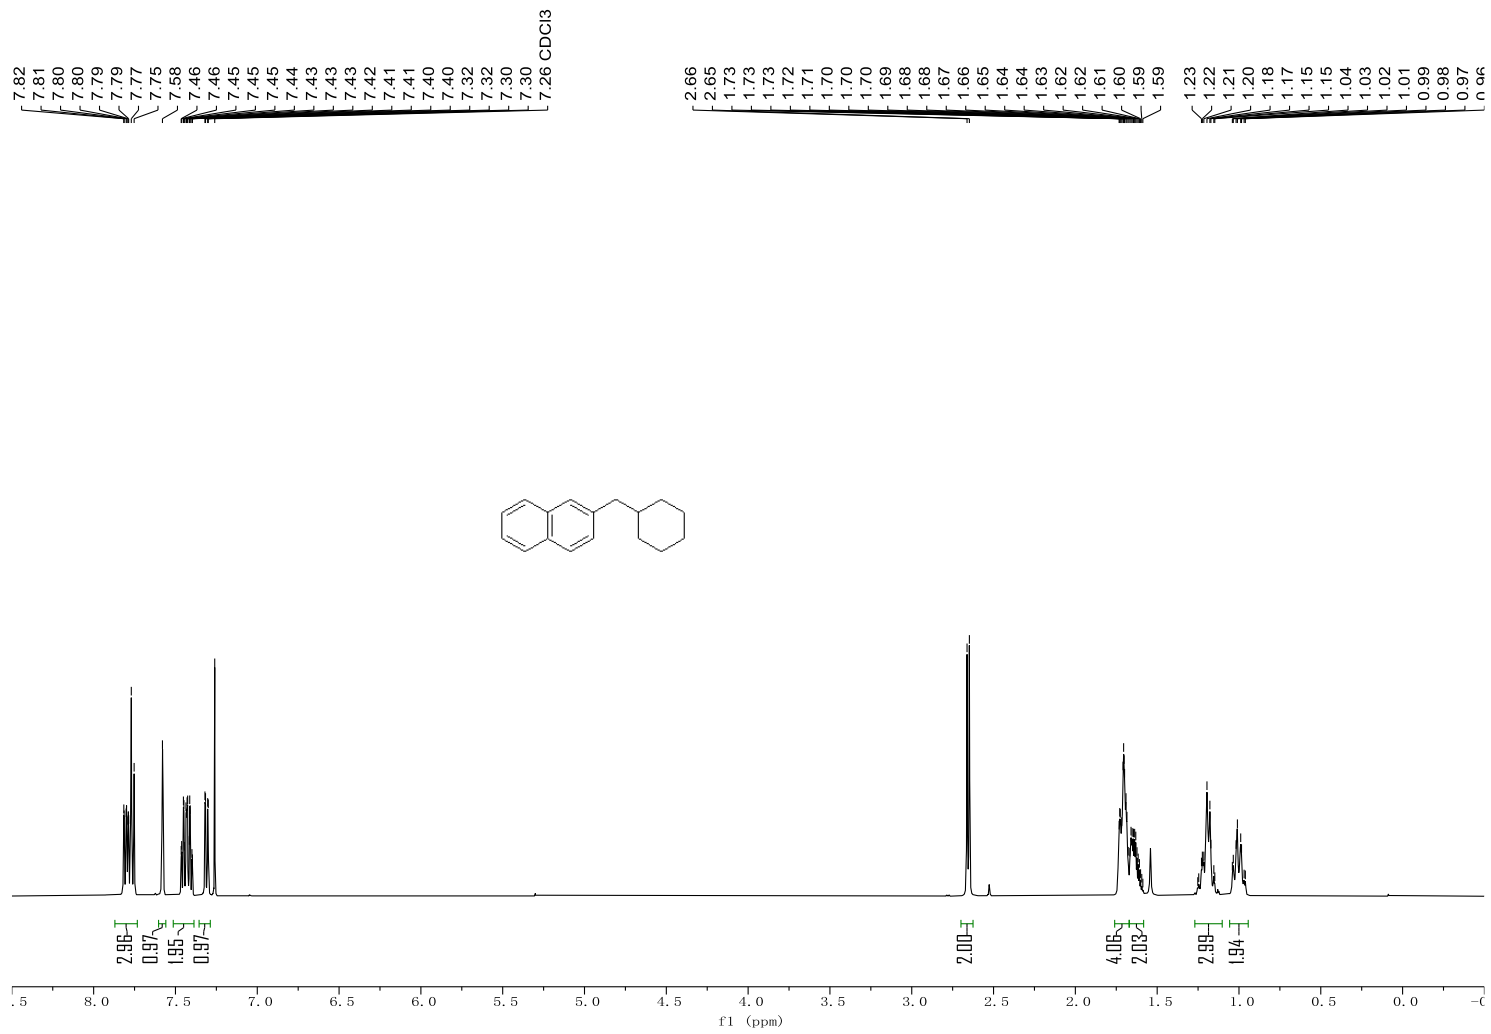

Figure S56  $^{13}\text{C}$  NMR of 3y

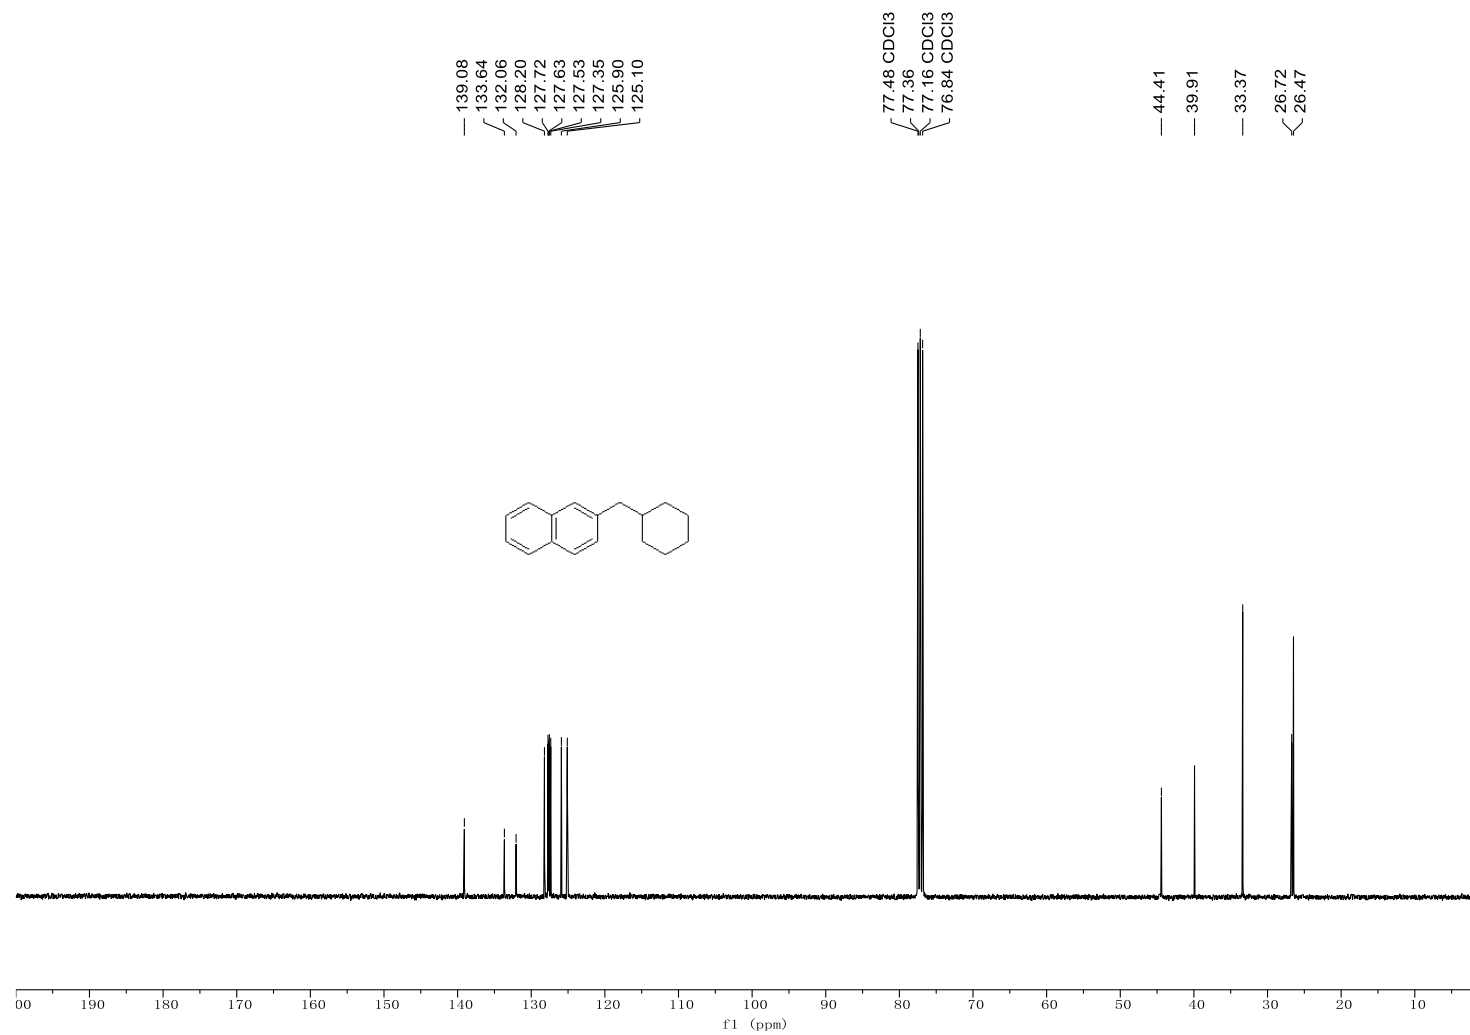



Figure S57  $^1\text{H}$  NMR of 3z

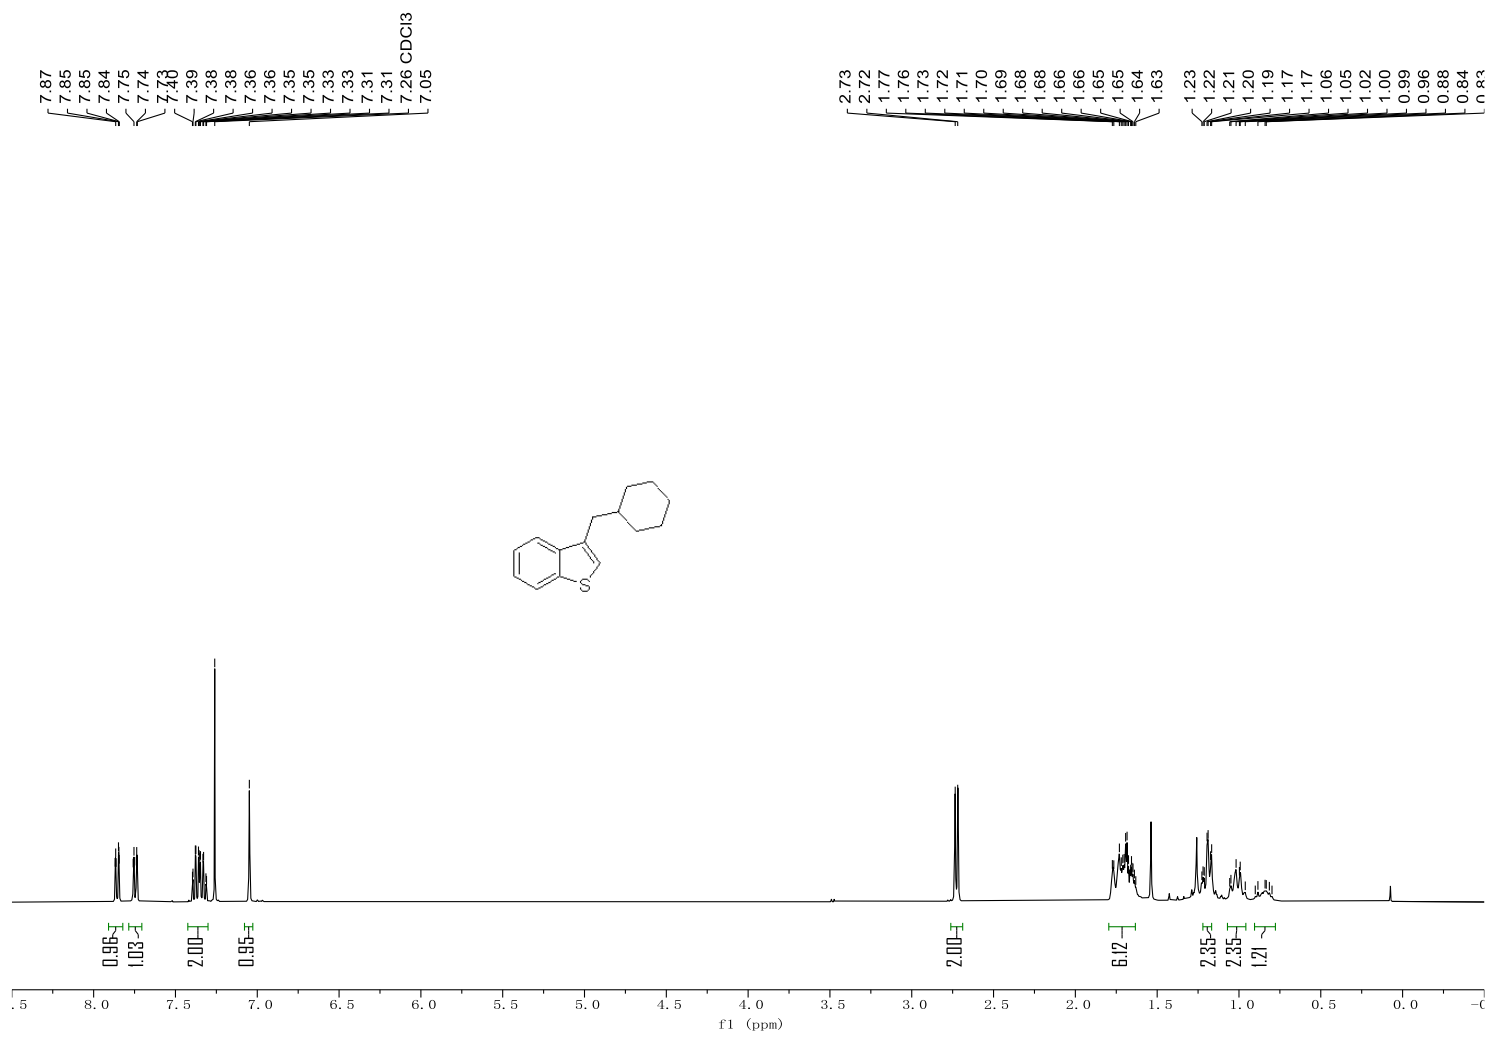

Figure S58  $^{13}\text{C}$  NMR of 3z

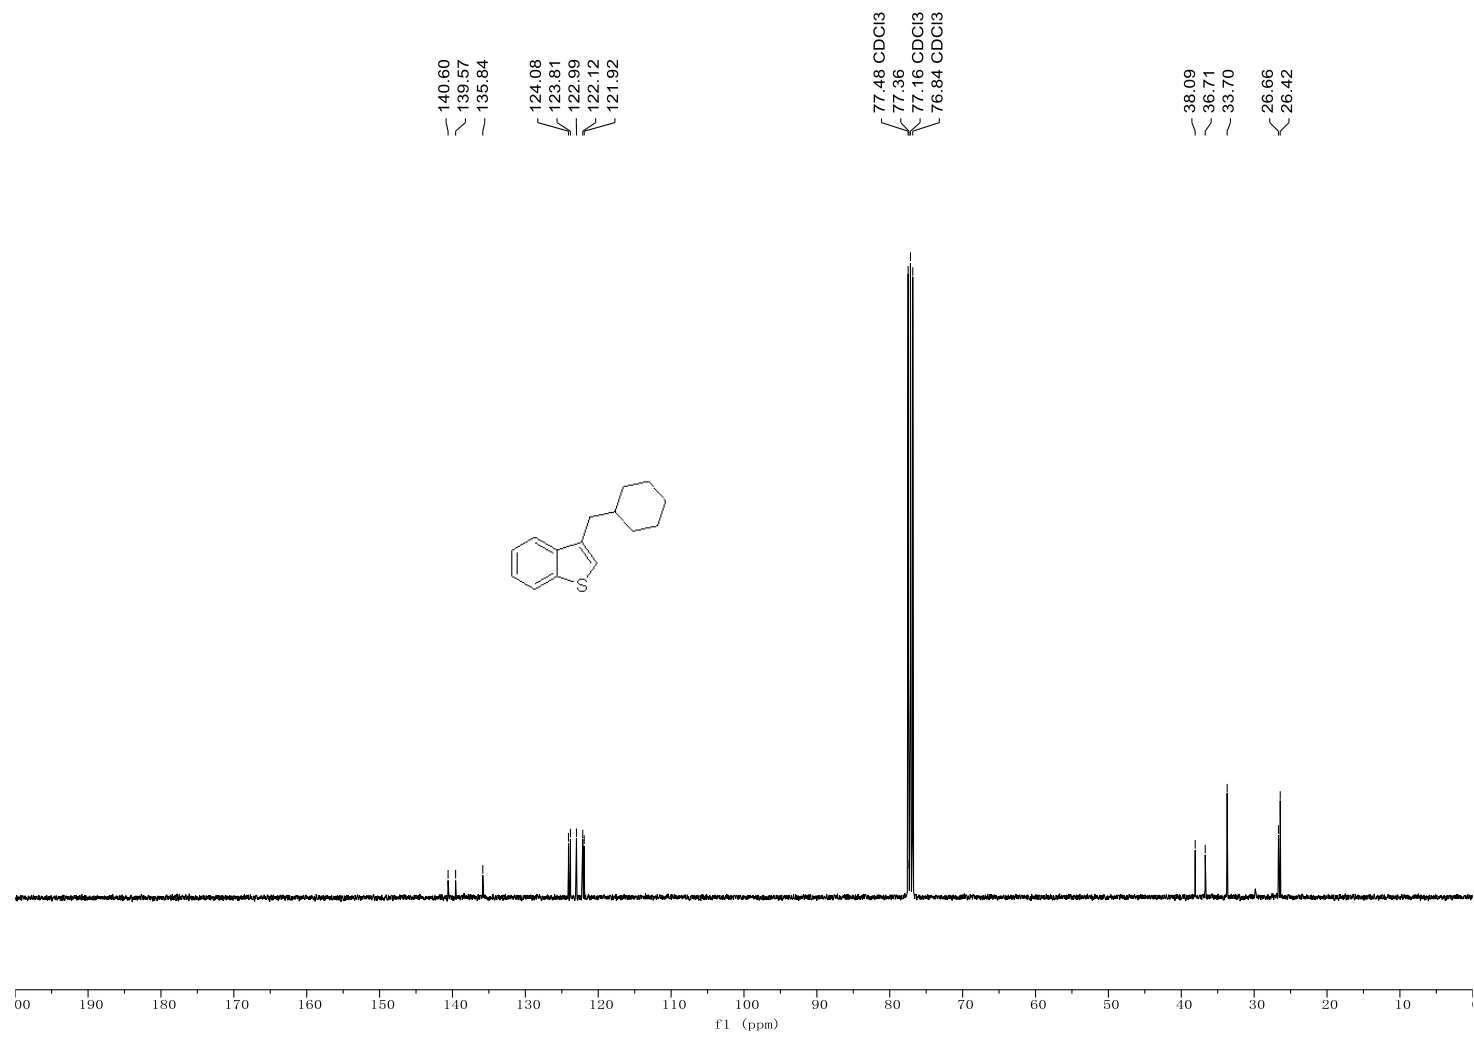

Figure S59  $^1\text{H}$  NMR of 3aa

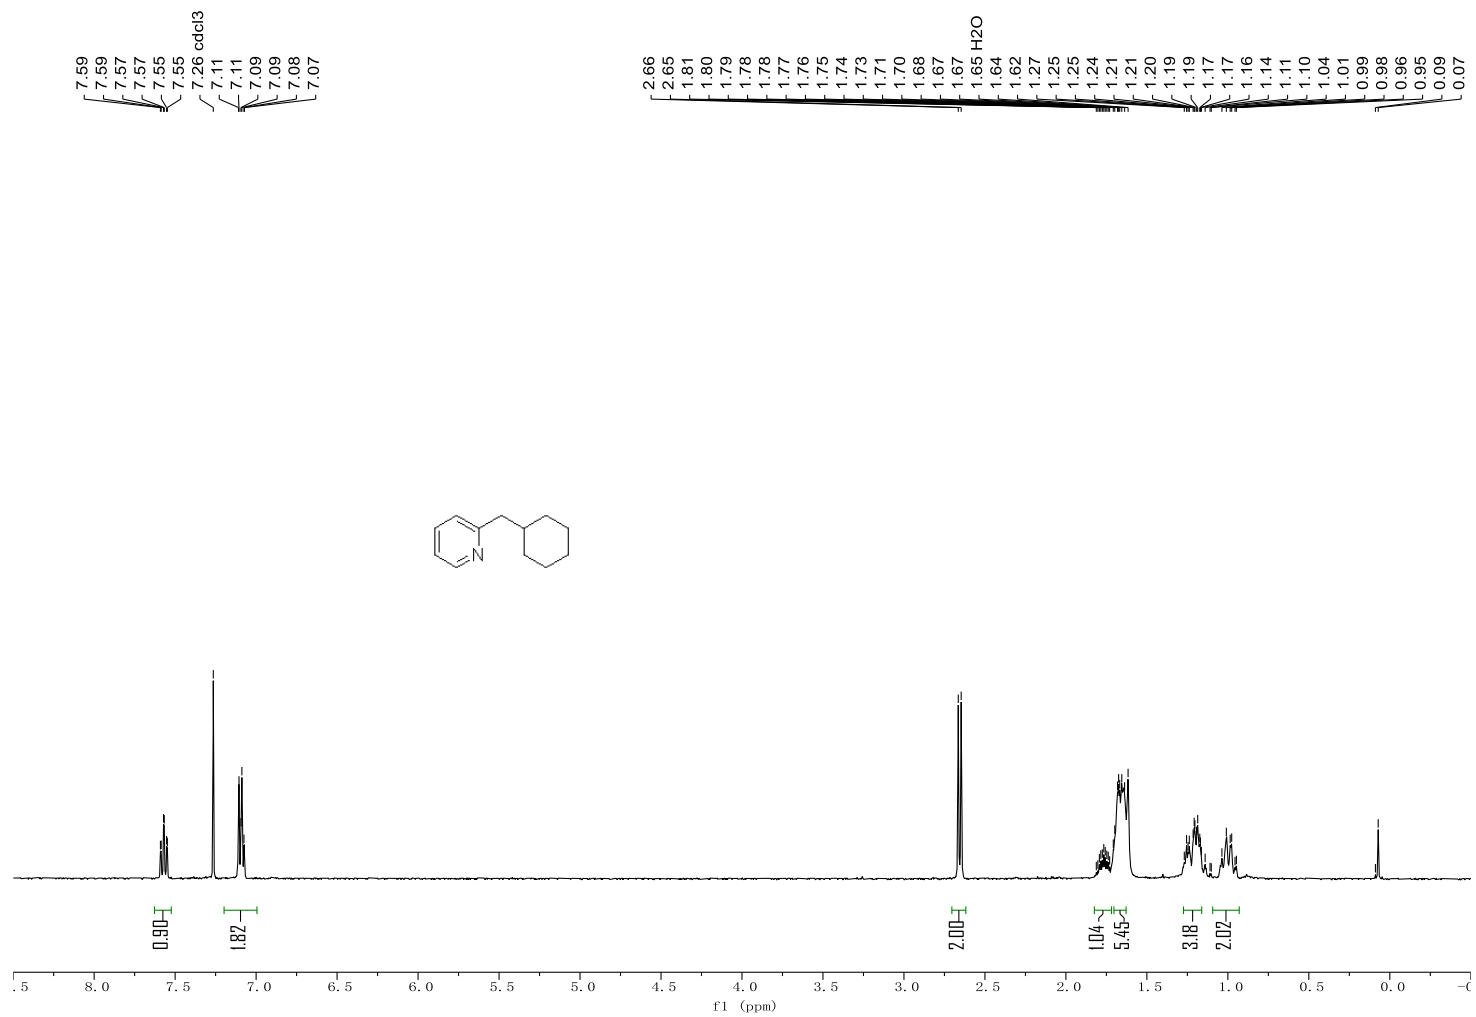

Figure S60  $^{13}\text{C}$  NMR of 3aa

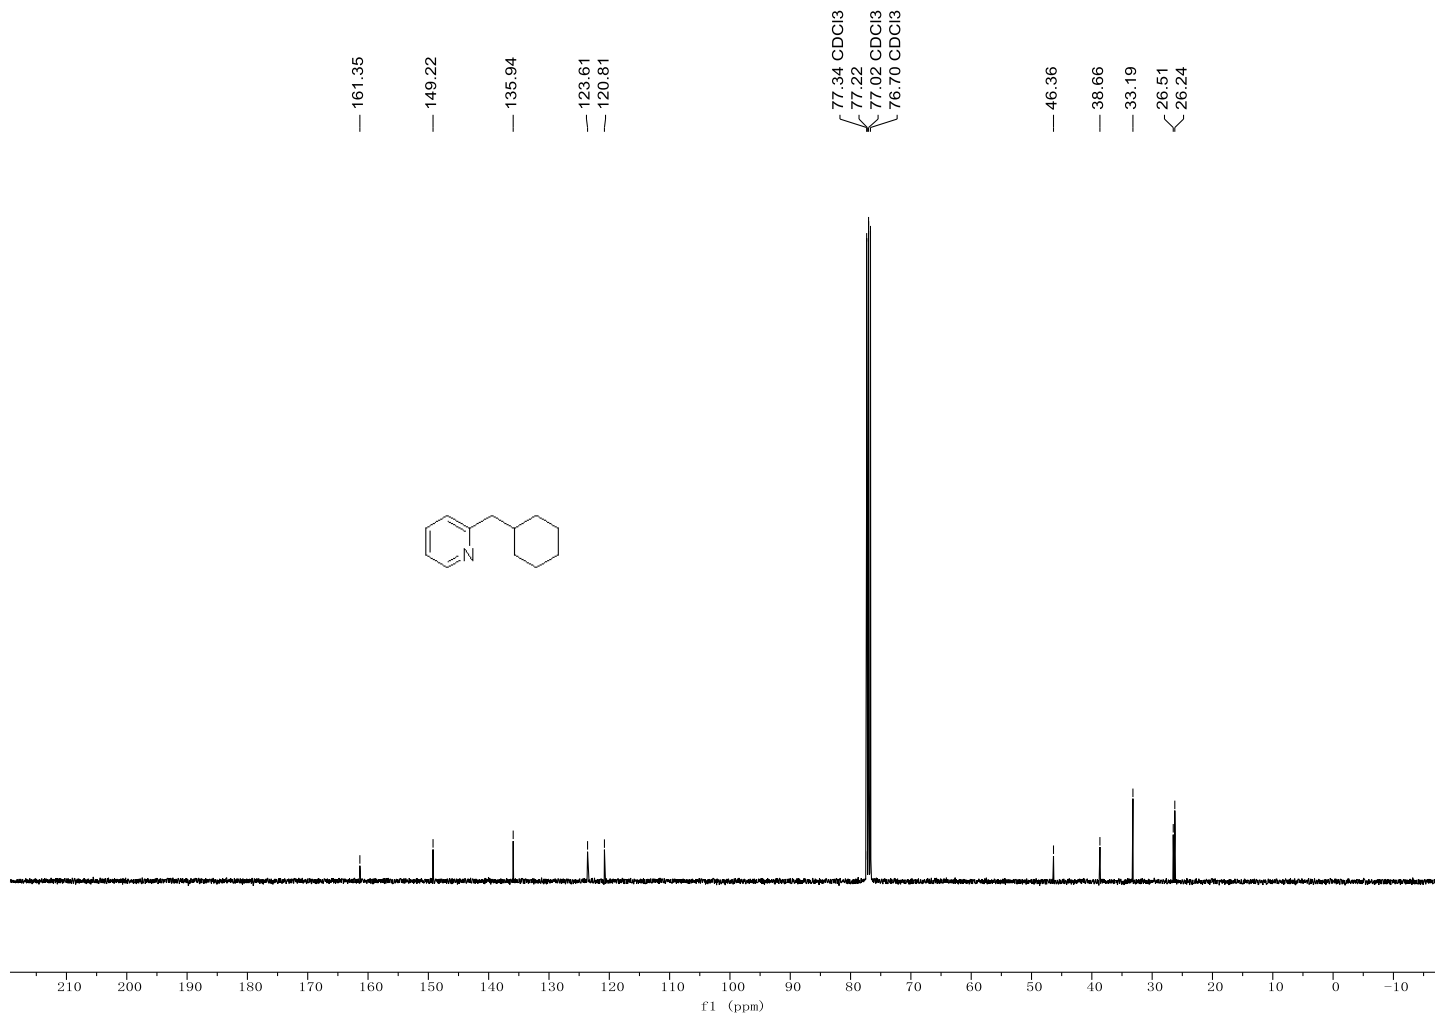

Figure S61  $^1\text{H}$  NMR of **3ab**

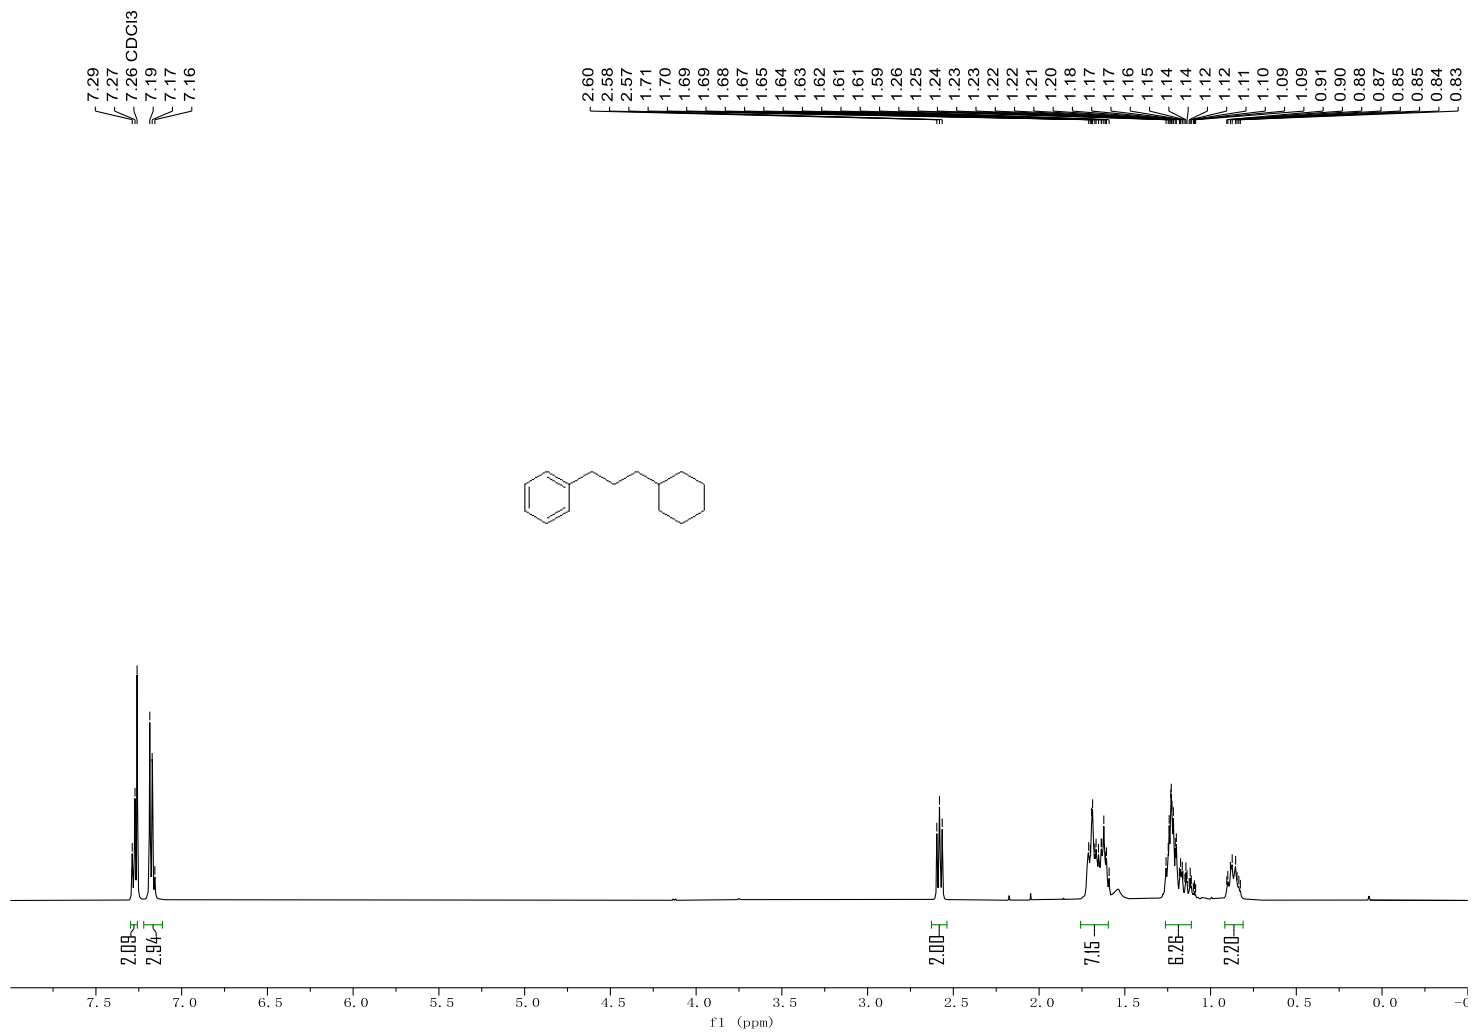

Figure S62  $^{13}\text{C}$  NMR of 3ab

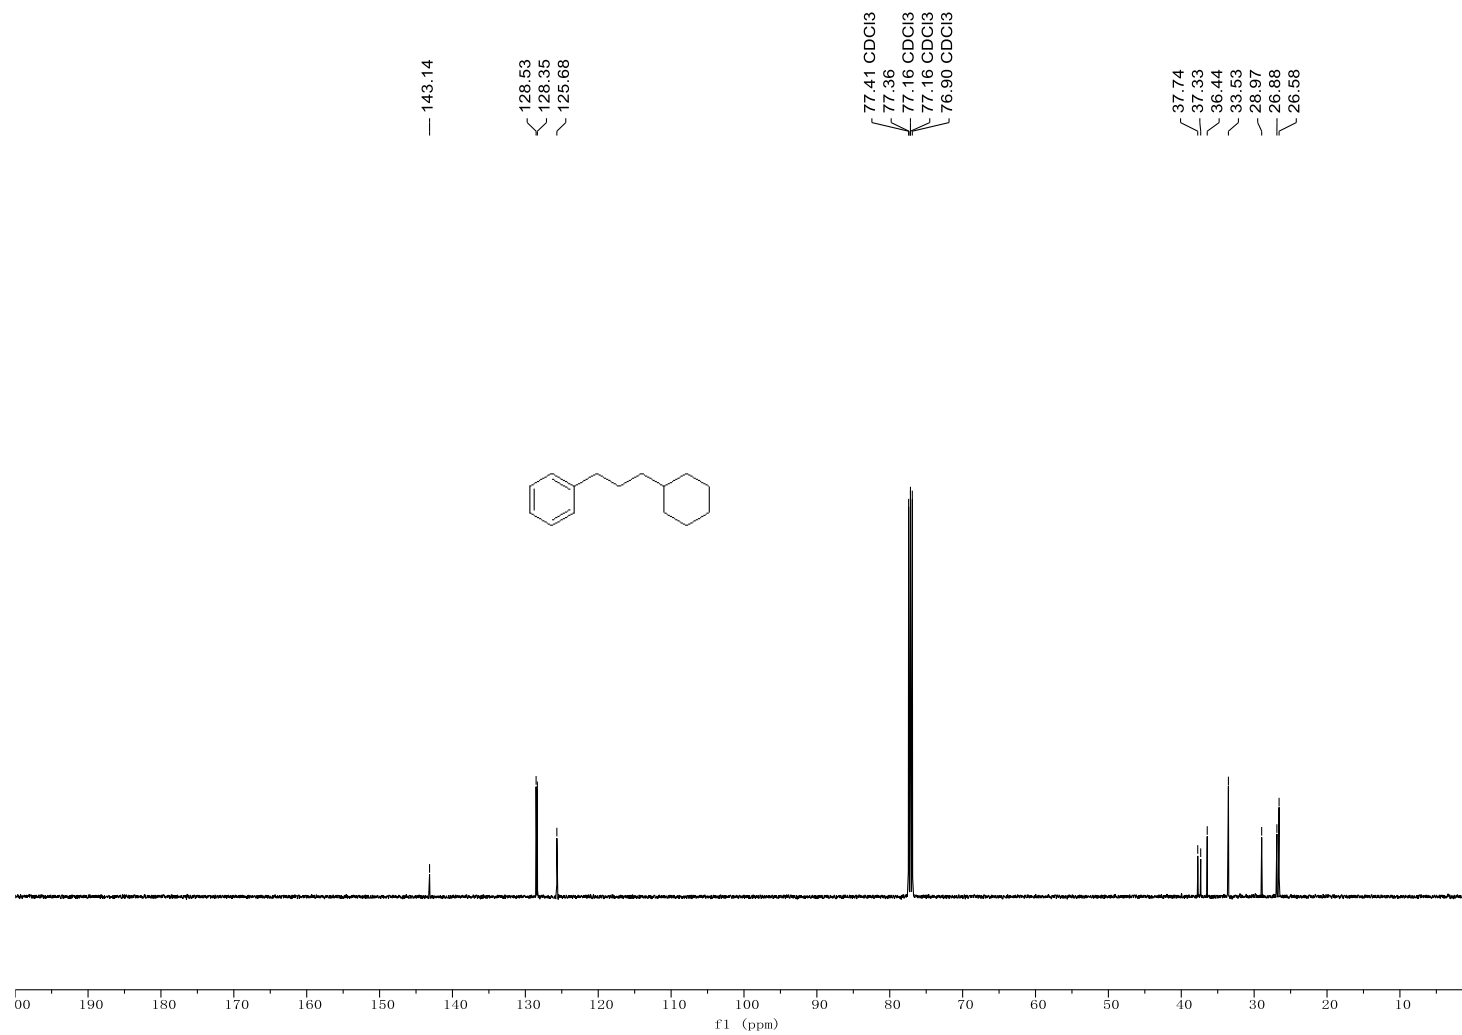

Figure S63 <sup>1</sup>H NMR of 3ac

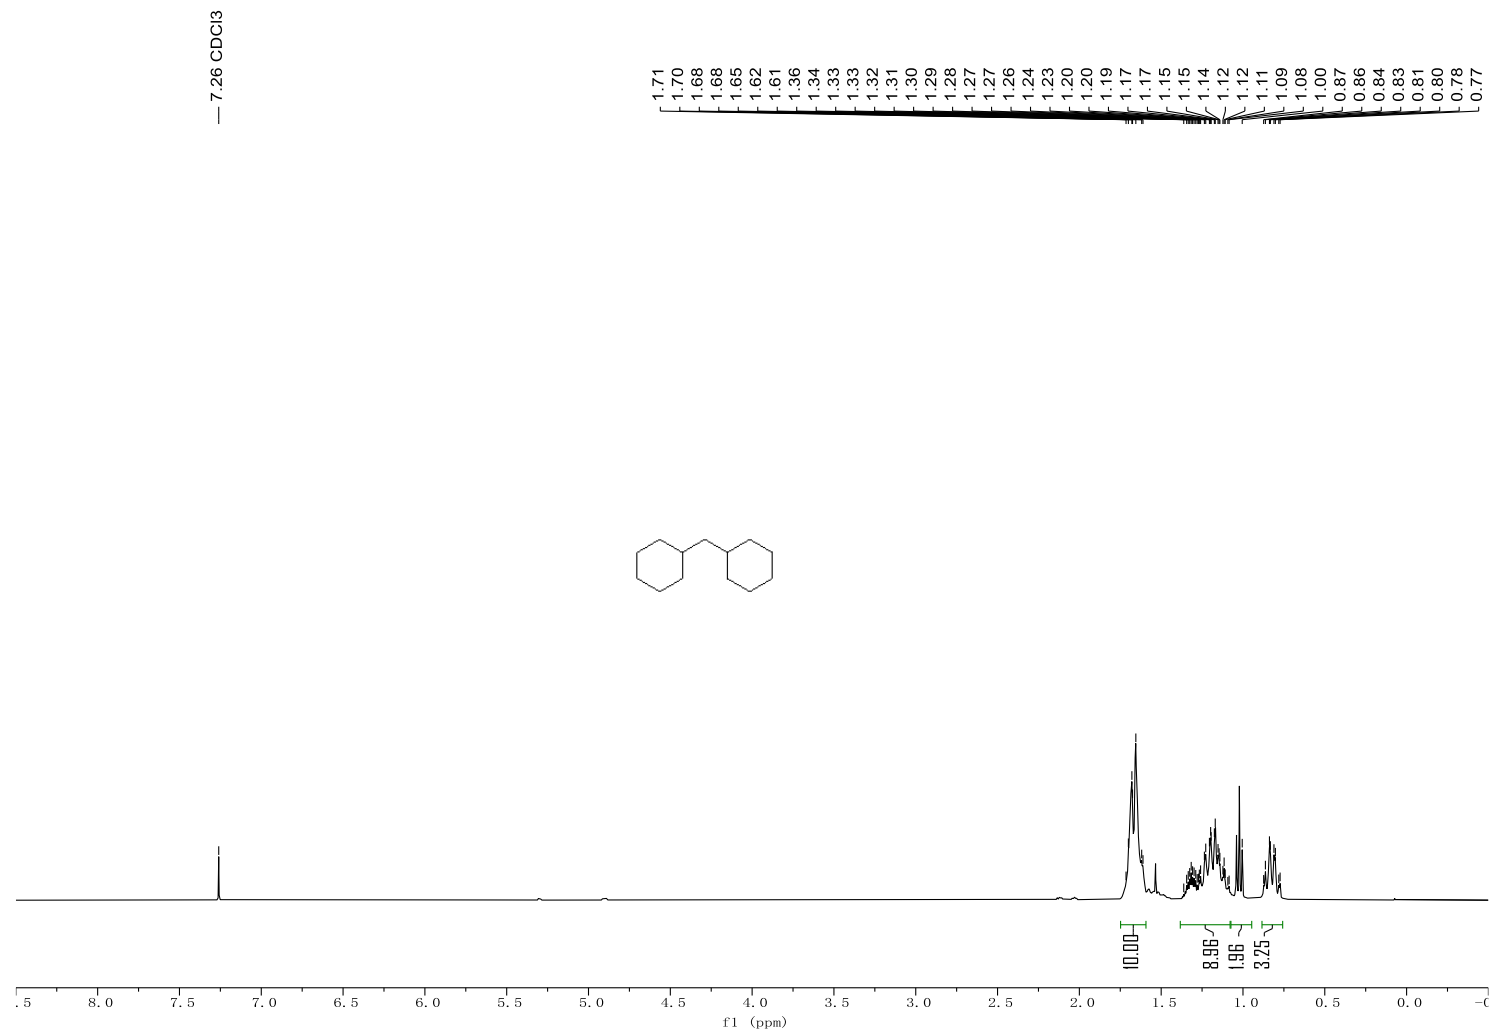

Figure S64  $^1\text{H}$  NMR of 4a

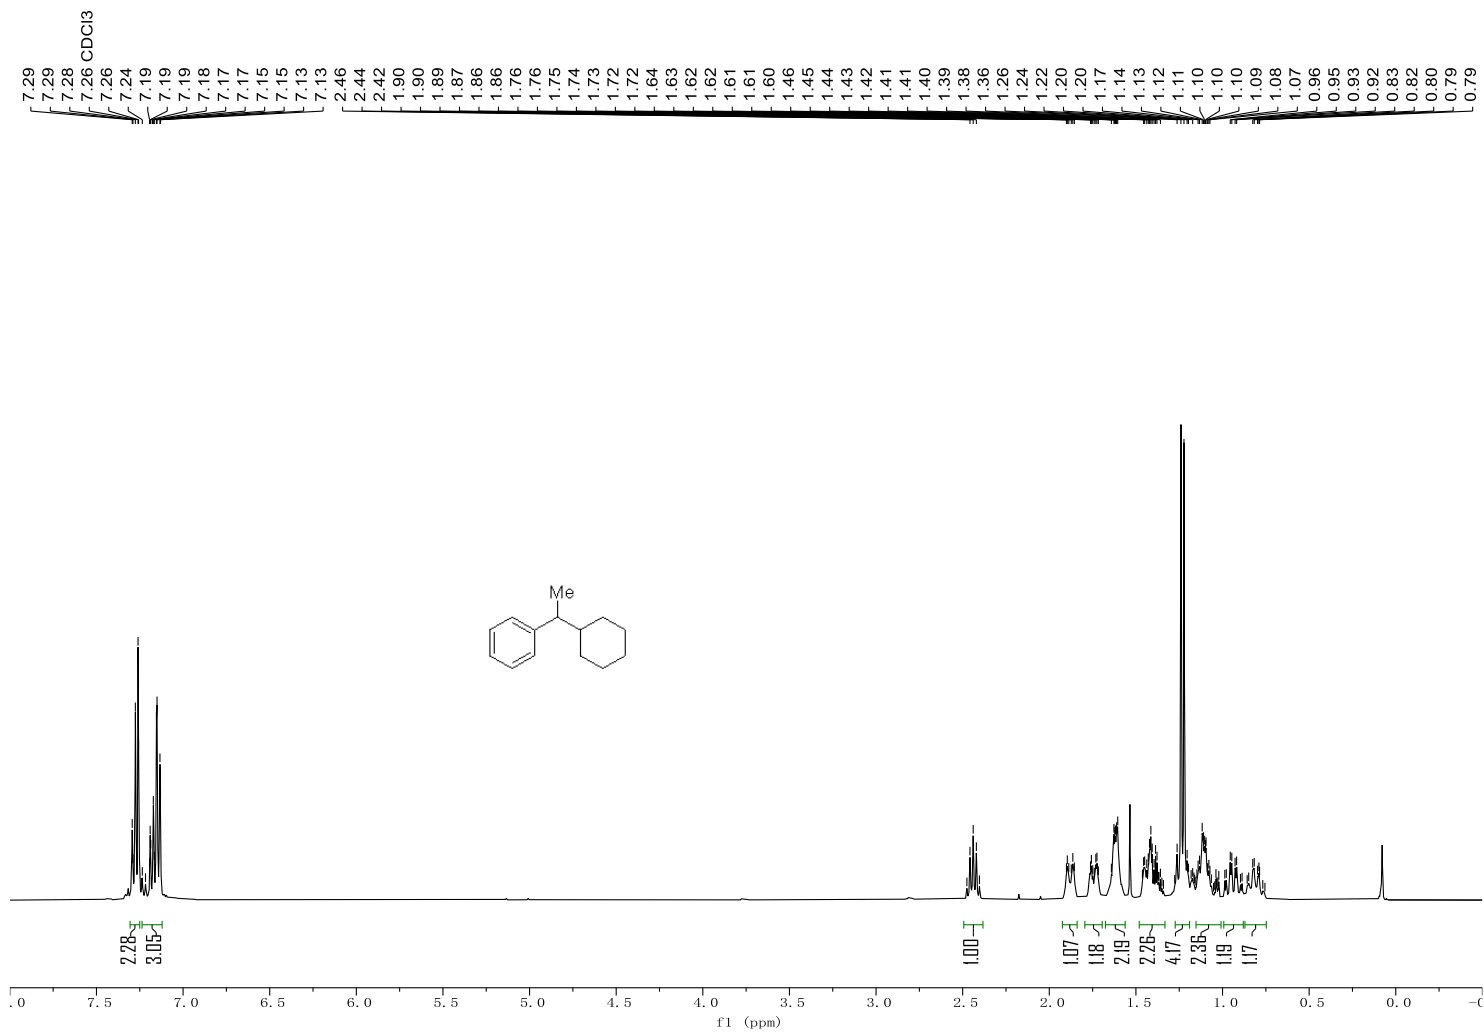



Figure S65  $^{13}\text{C}$  NMR of 4a

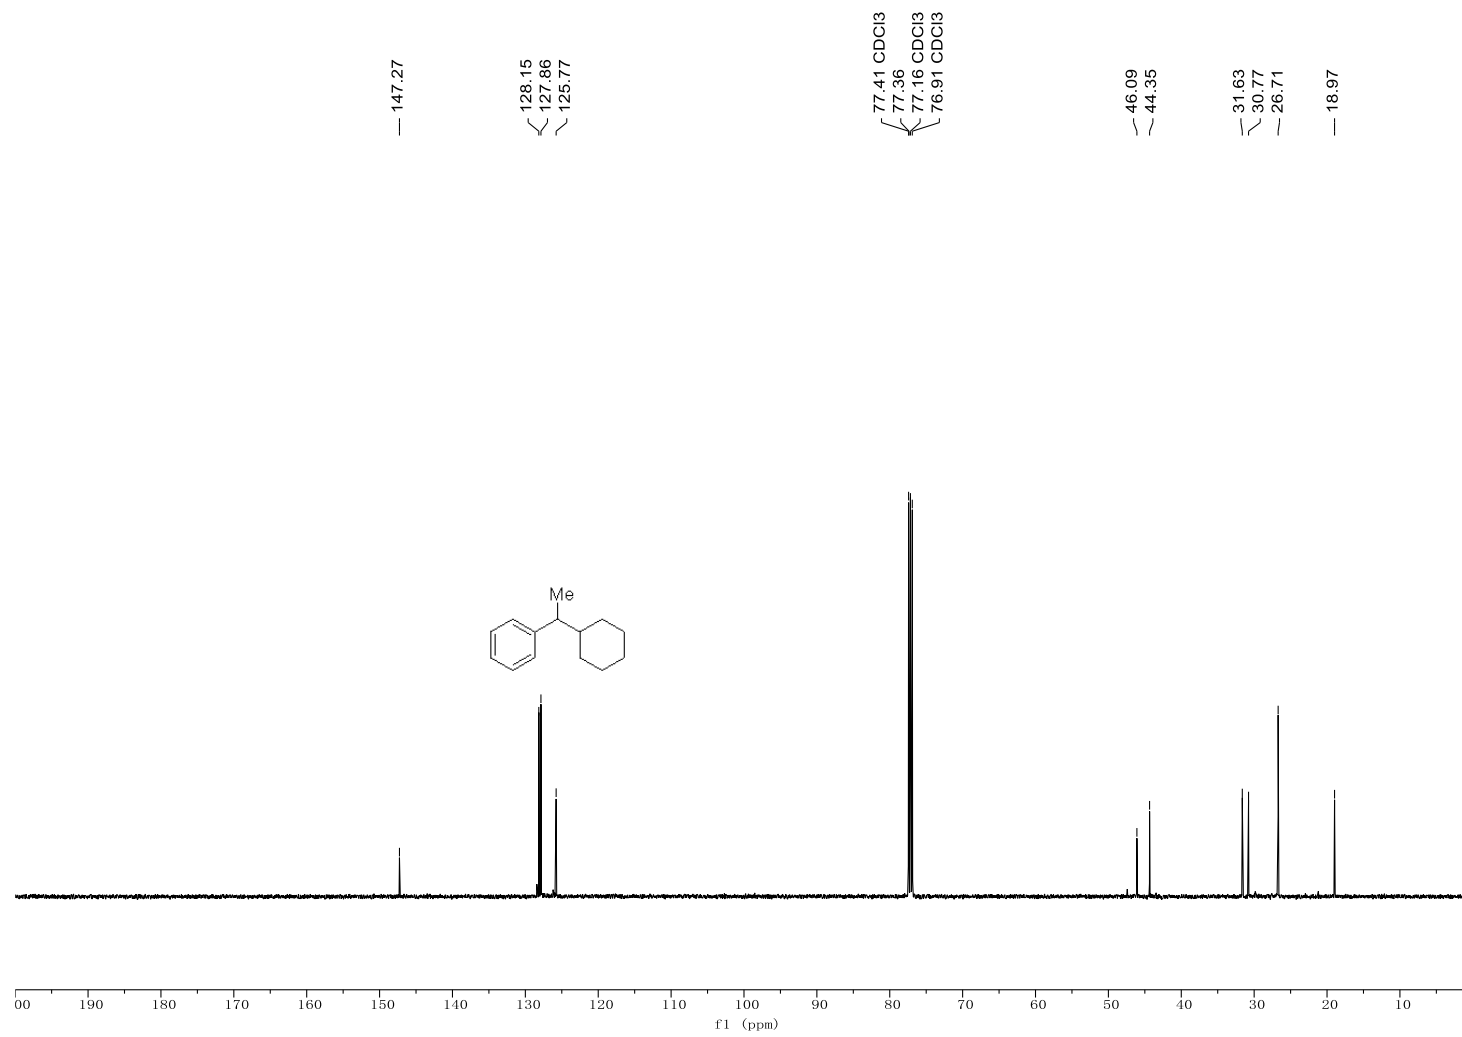

Figure S66  $^1\text{H}$  NMR of 4b

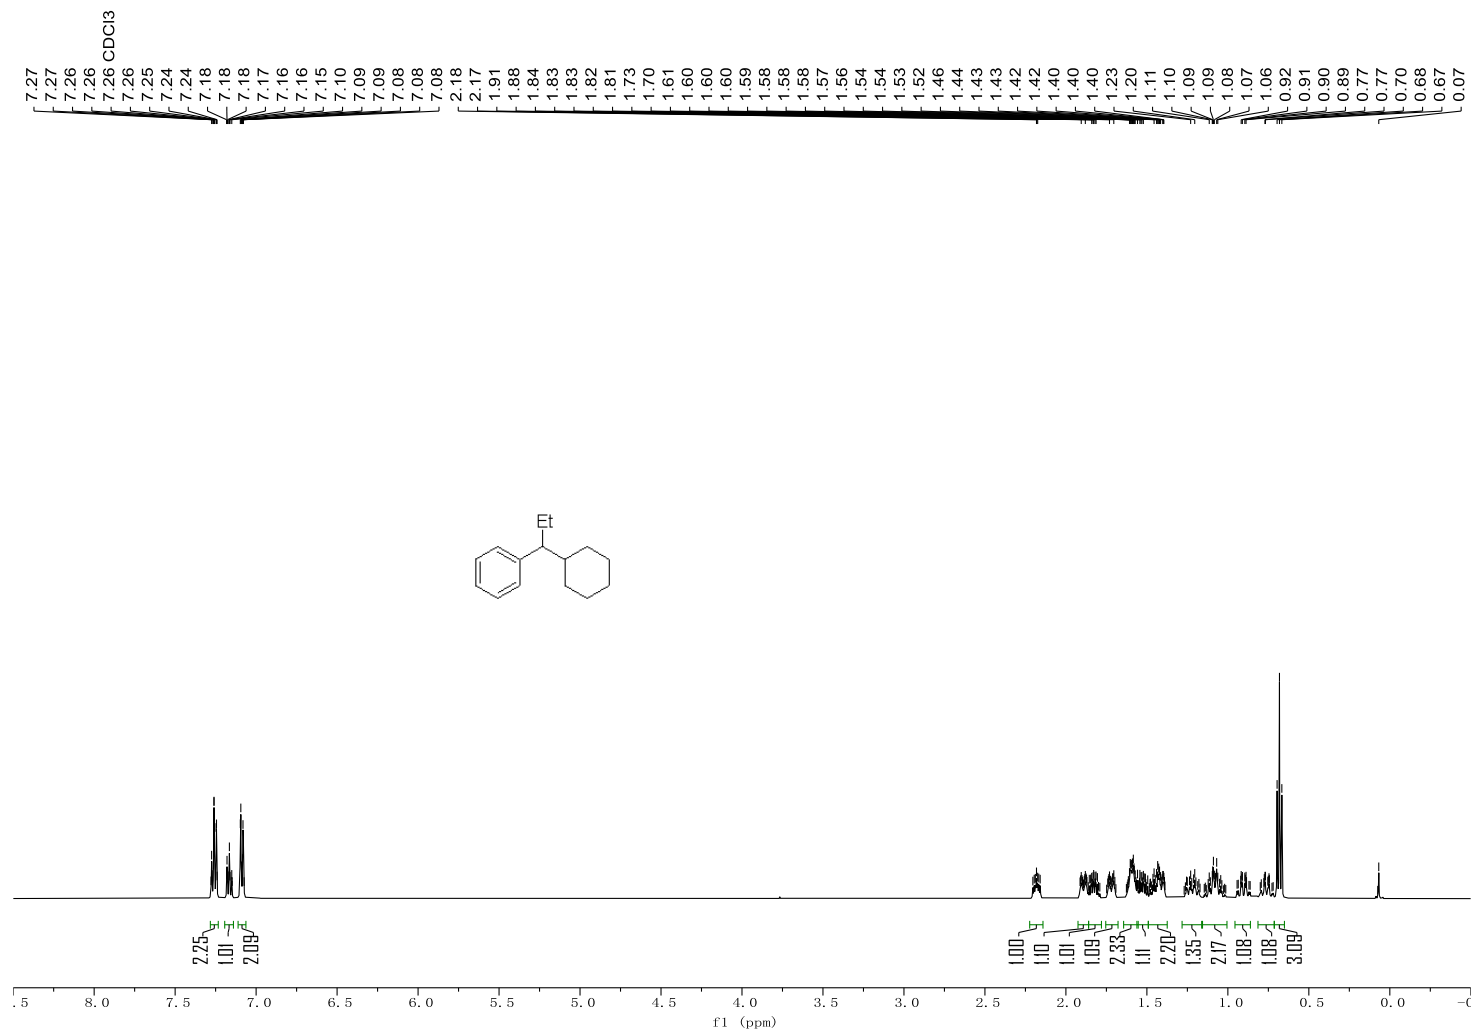

Figure S67 <sup>13</sup>C NMR of 4b

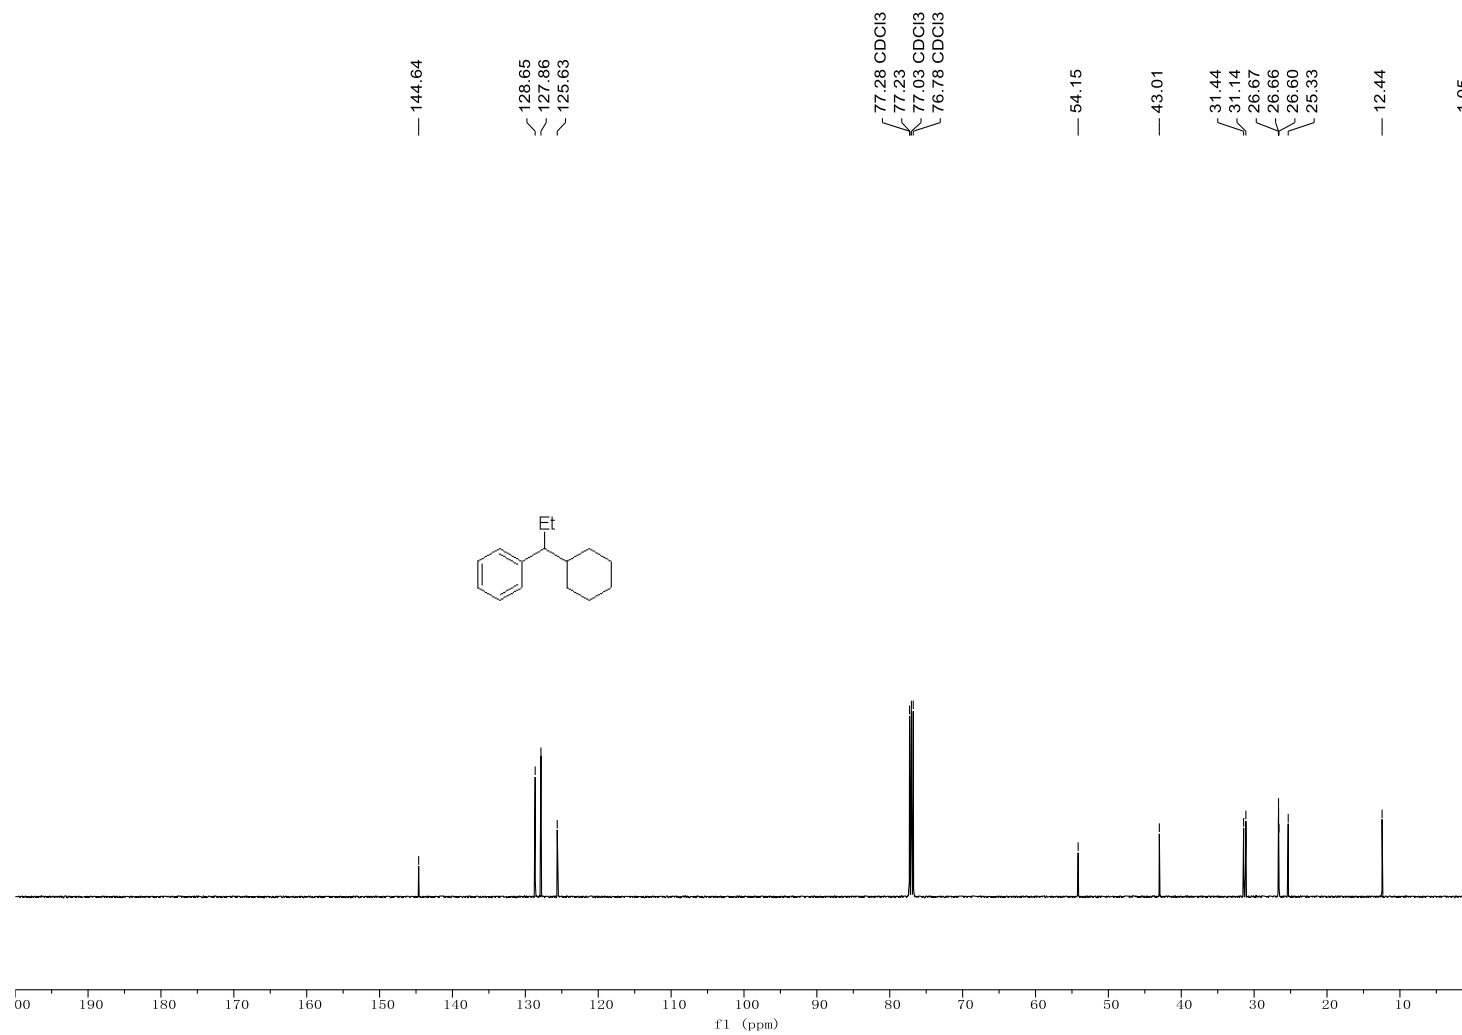

Figure S68  $^1\text{H}$  NMR of 4c

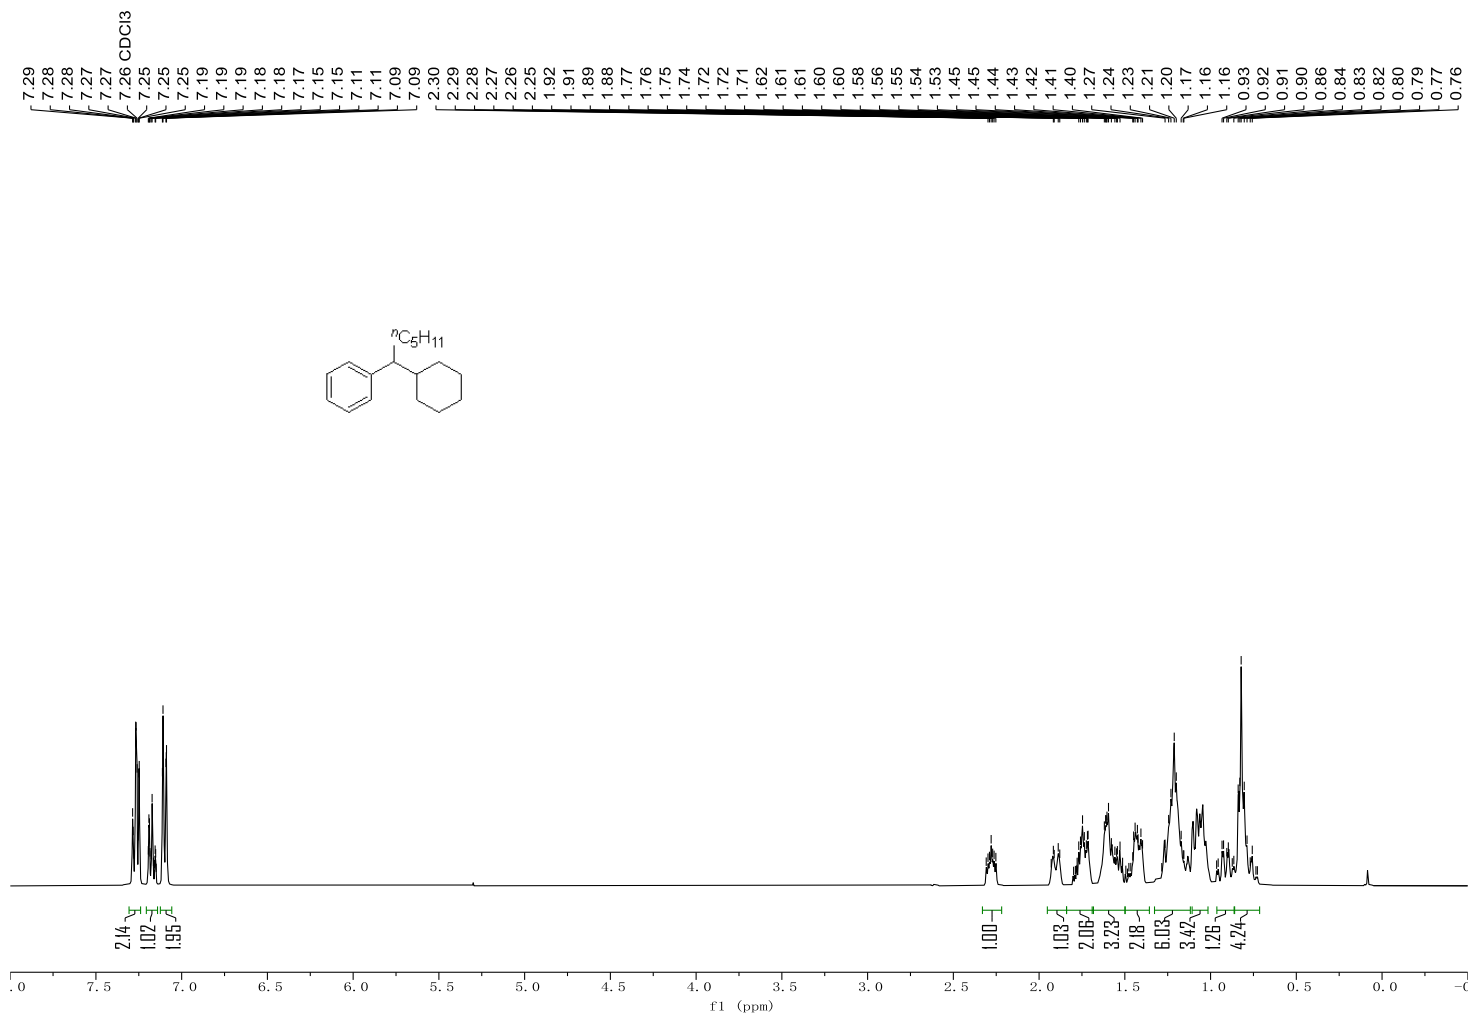

Figure S69  $^{13}\text{C}$  NMR of 4c

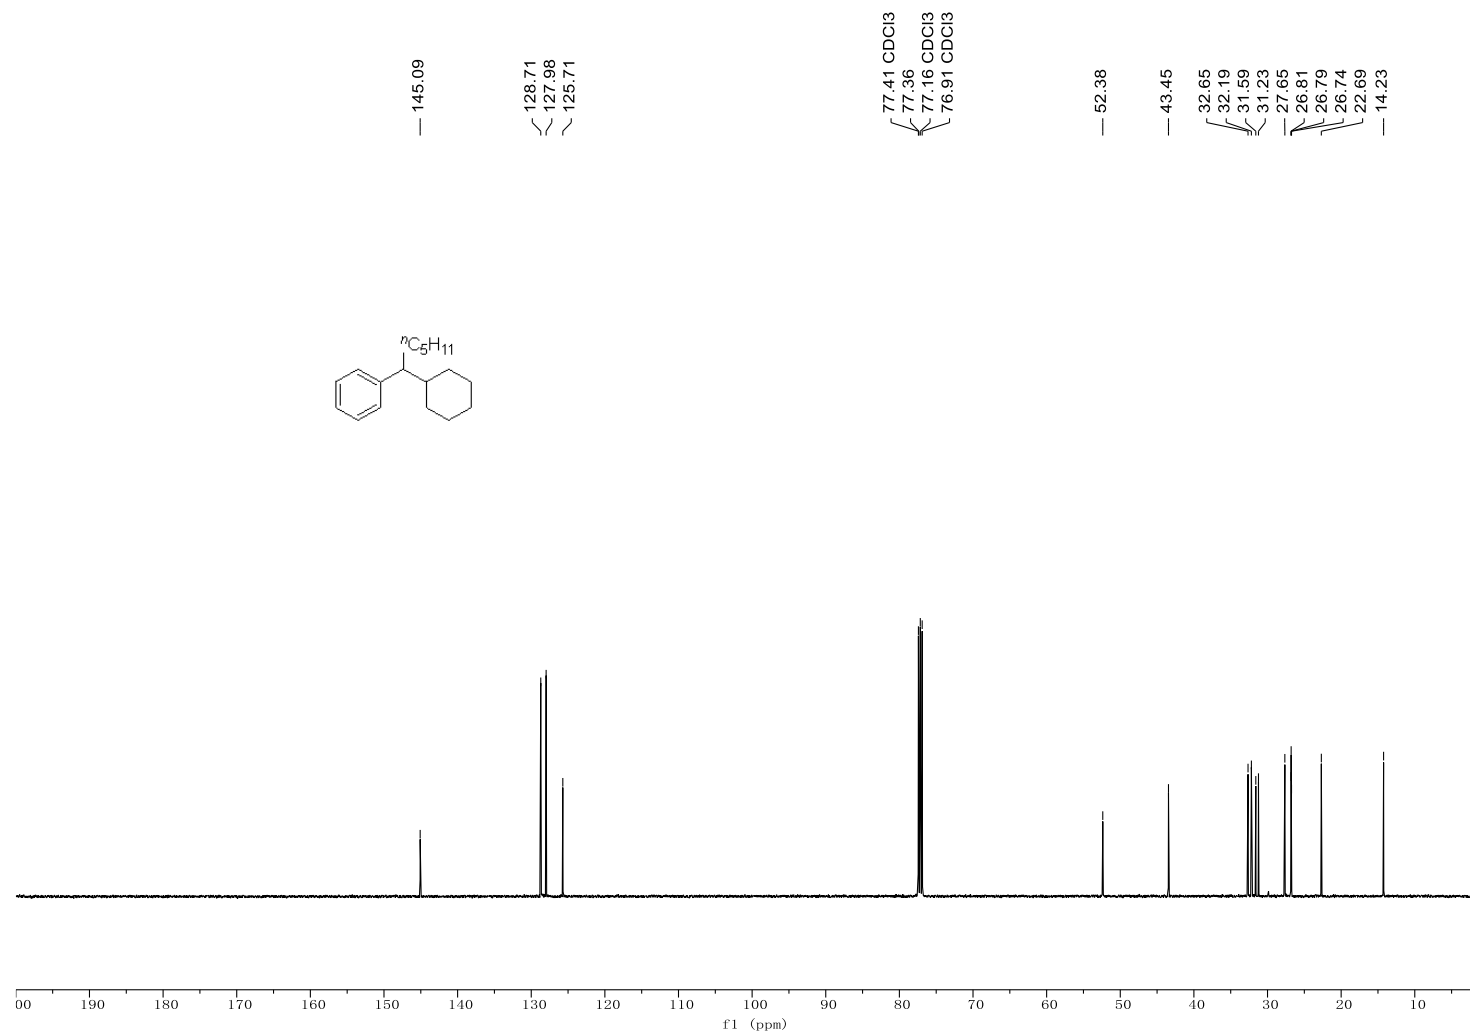

Figure S70  $^1\text{H}$  NMR of 4d

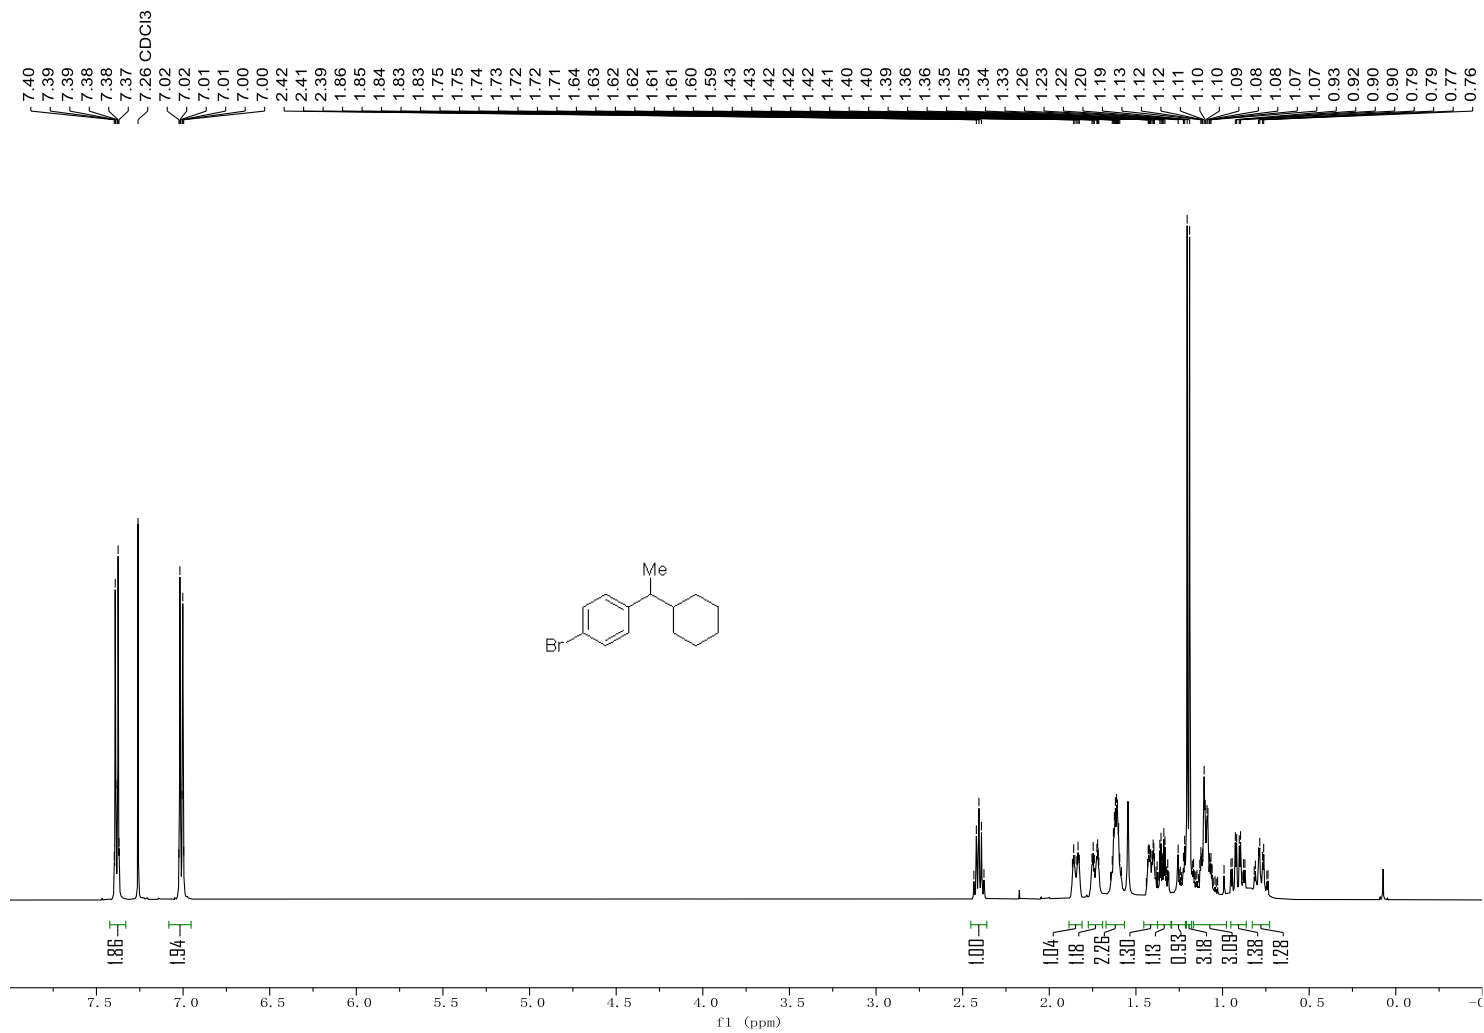

Figure S71  $^{13}\text{C}$  NMR of 4d

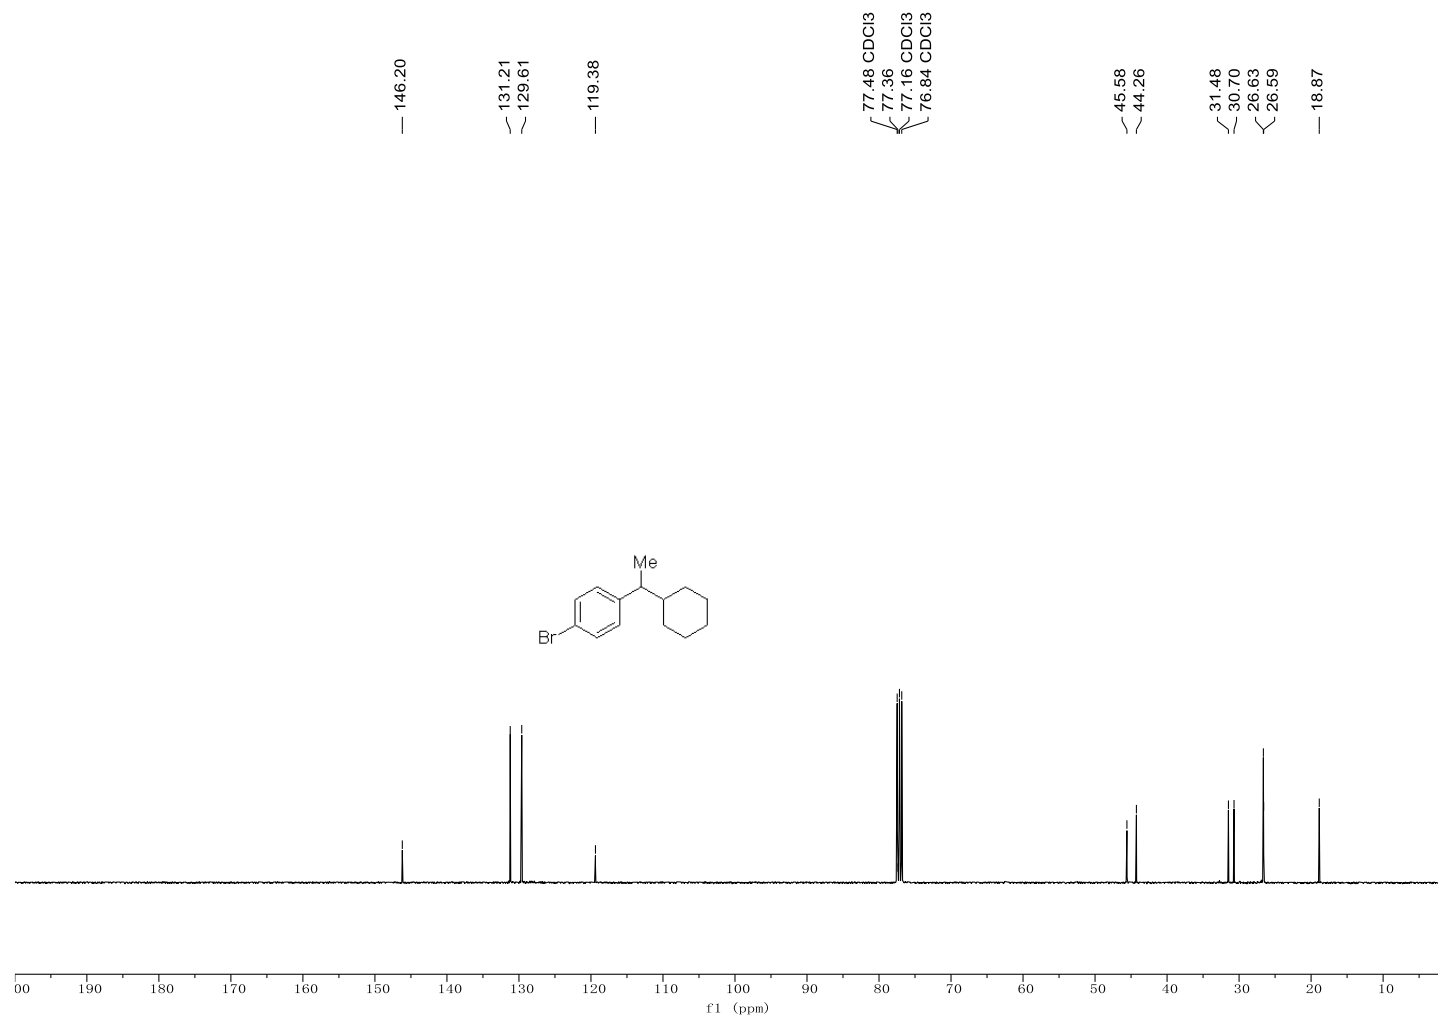

Figure S72  $^1\text{H}$  NMR of 4e

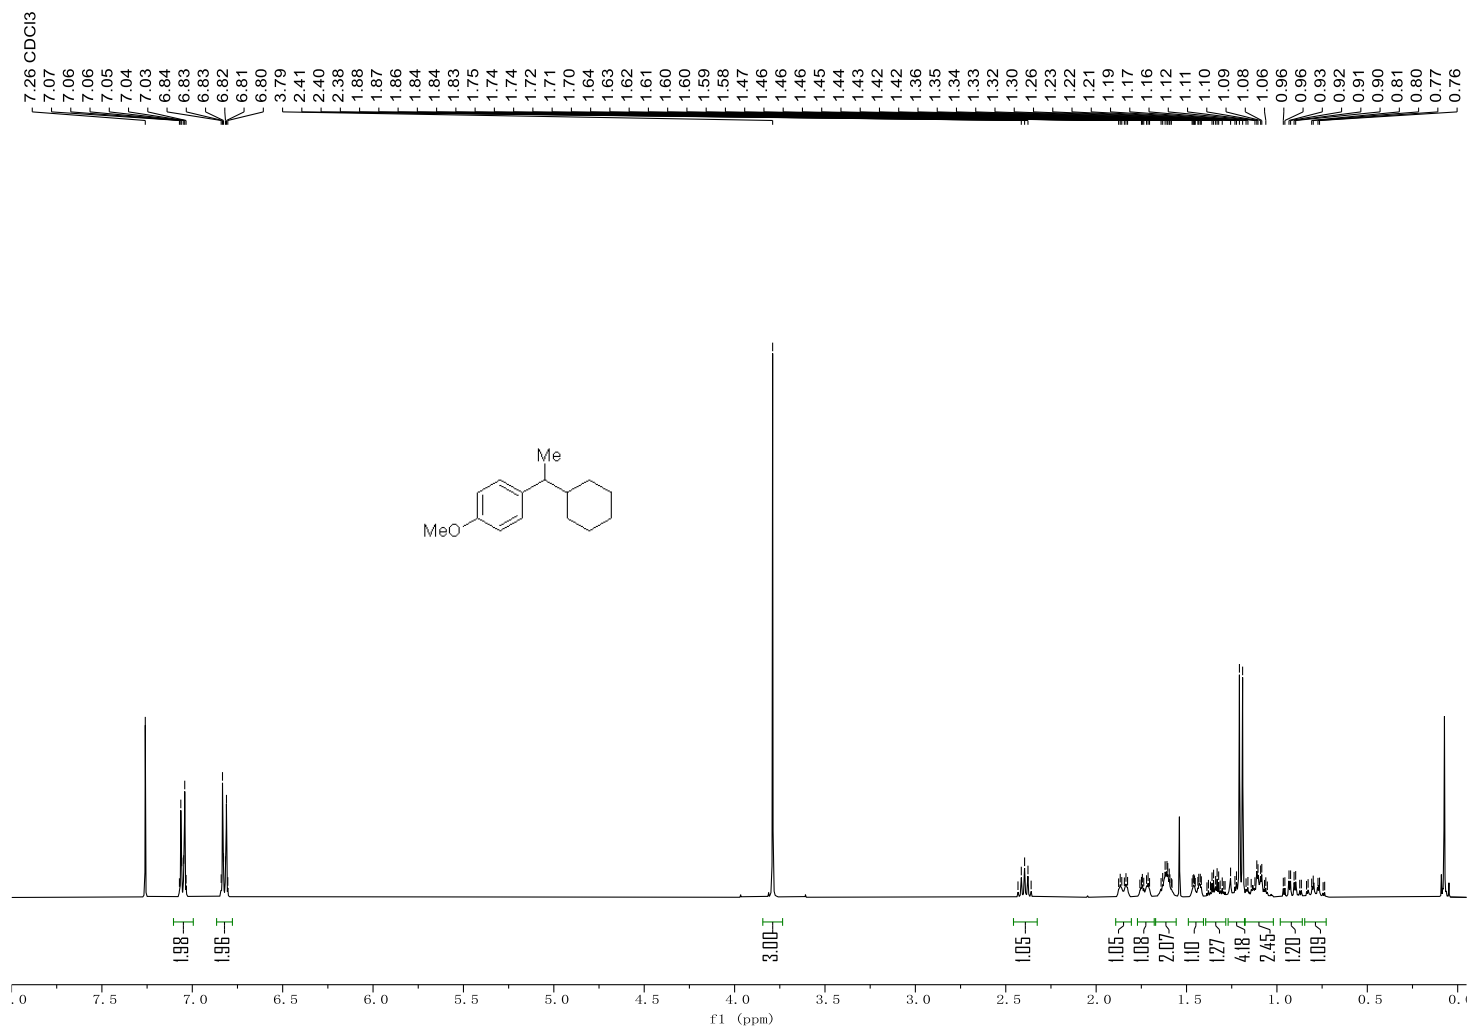



Figure S73  $^{13}\text{C}$  NMR of **4e**

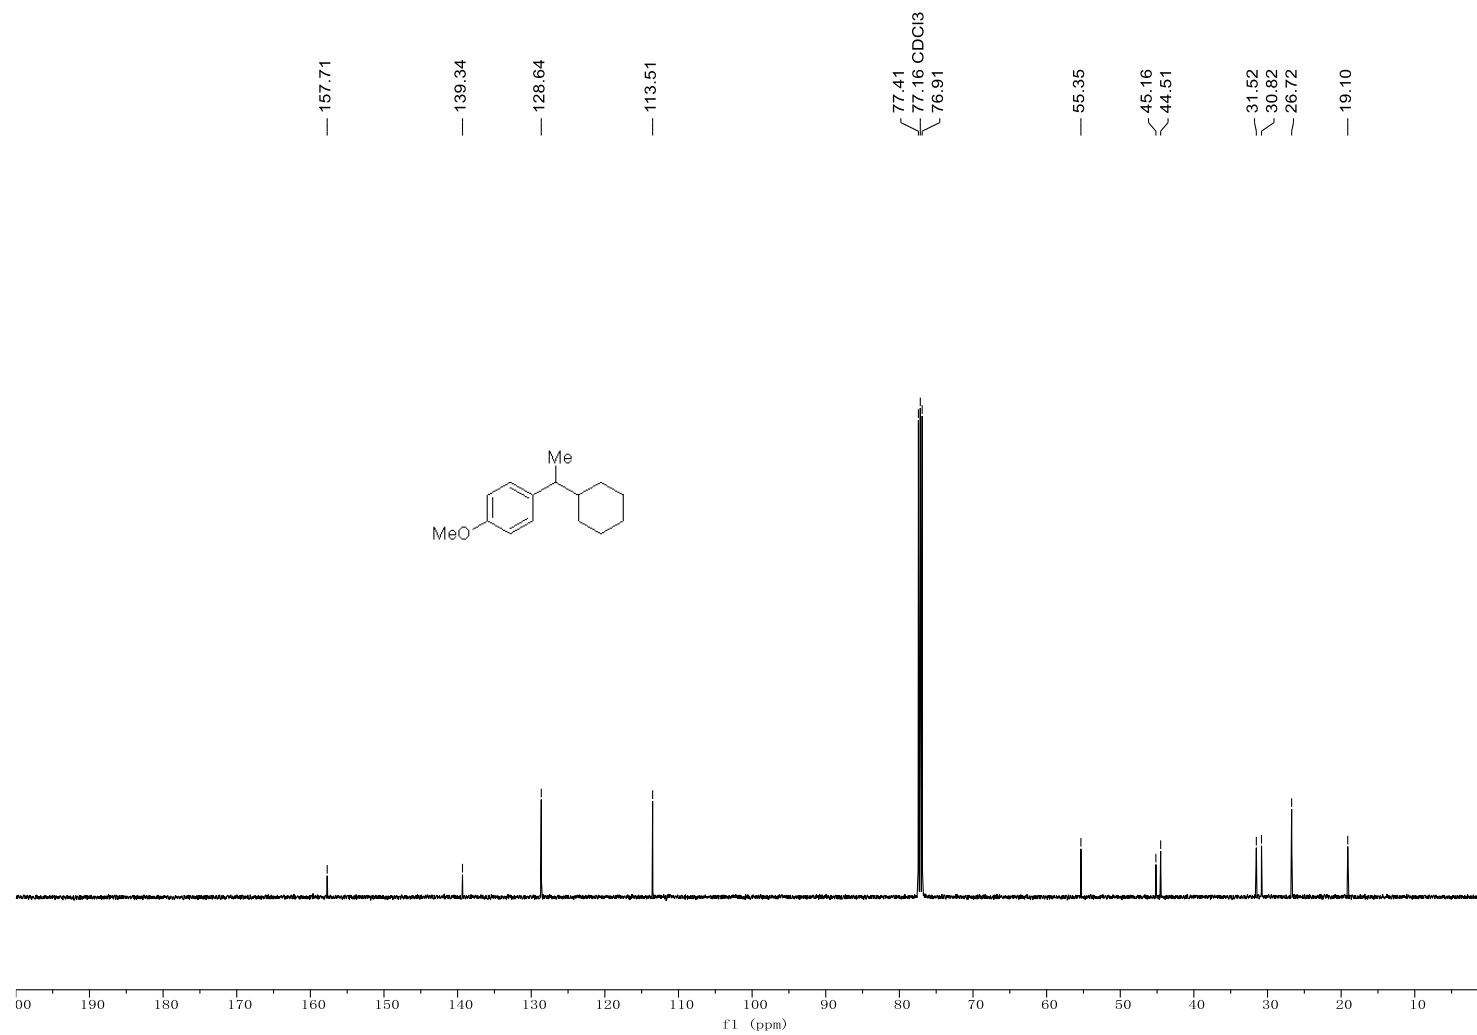

Figure S74  $^1\text{H}$  NMR of 4f

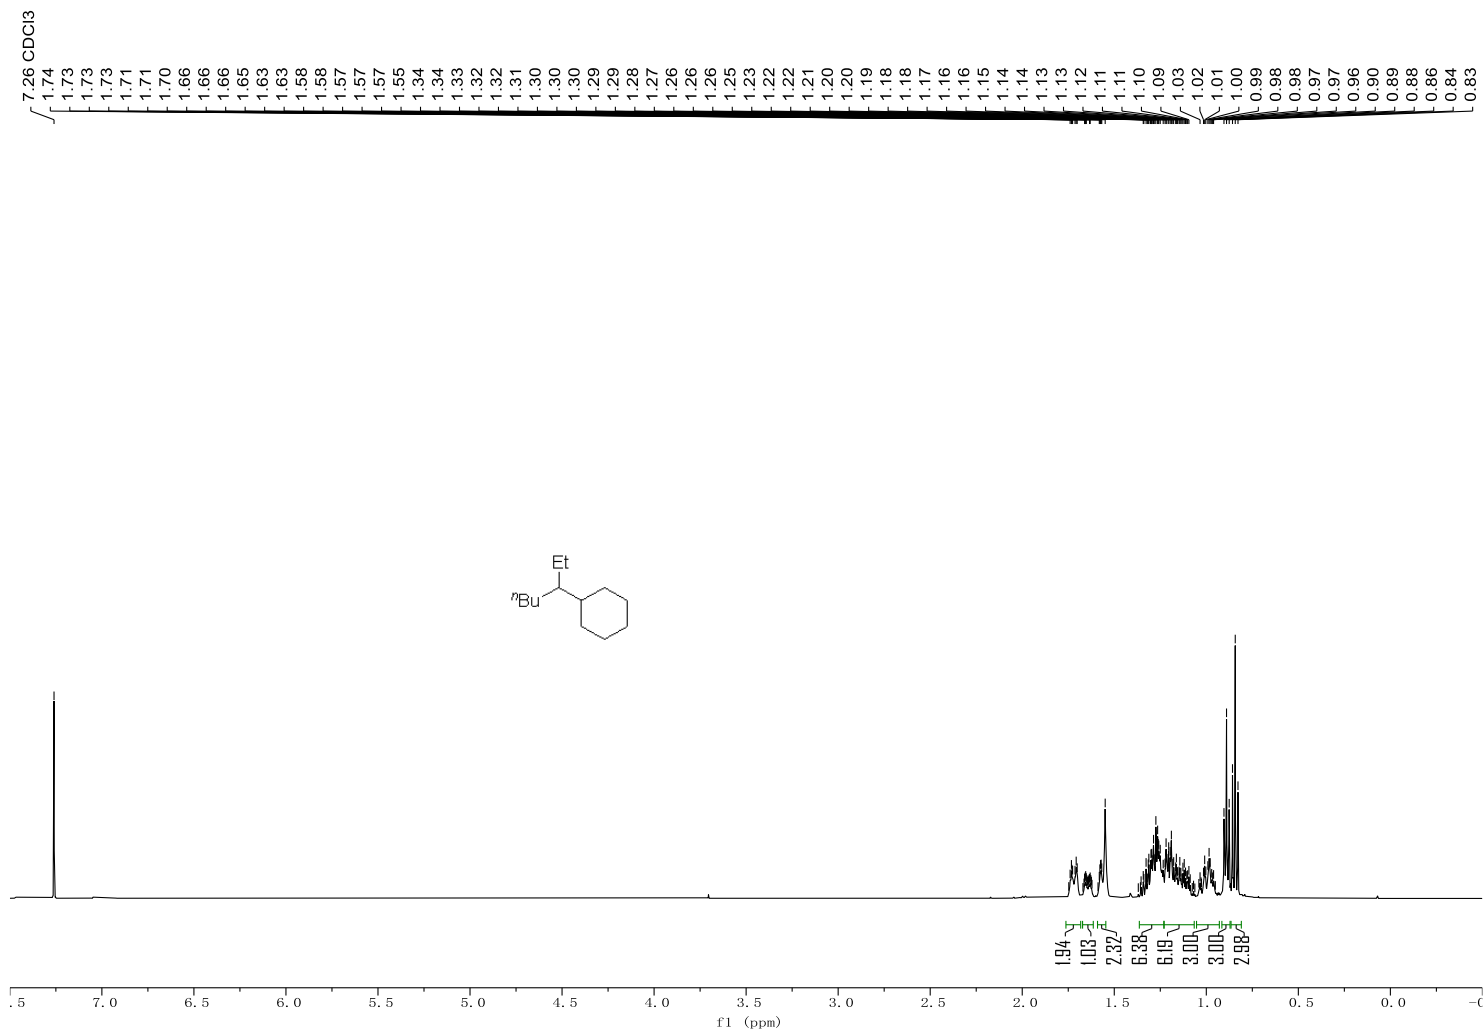

Figure S75  $^1\text{H}$  NMR of 4f

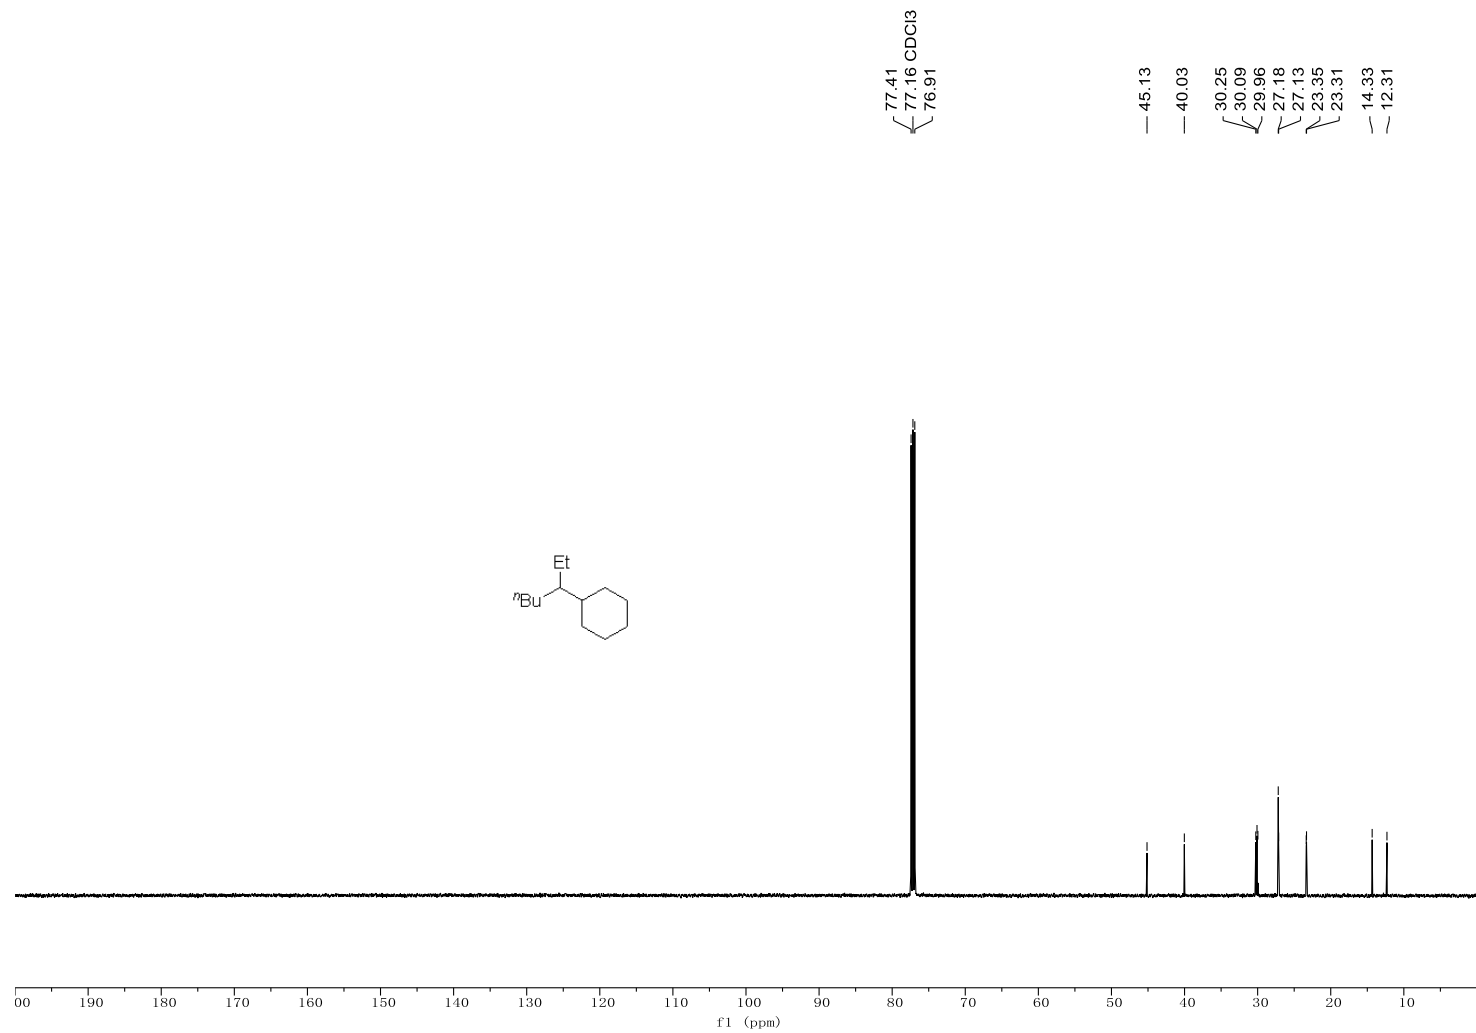

Figure S76  $^1\text{H}$  NMR of 4g

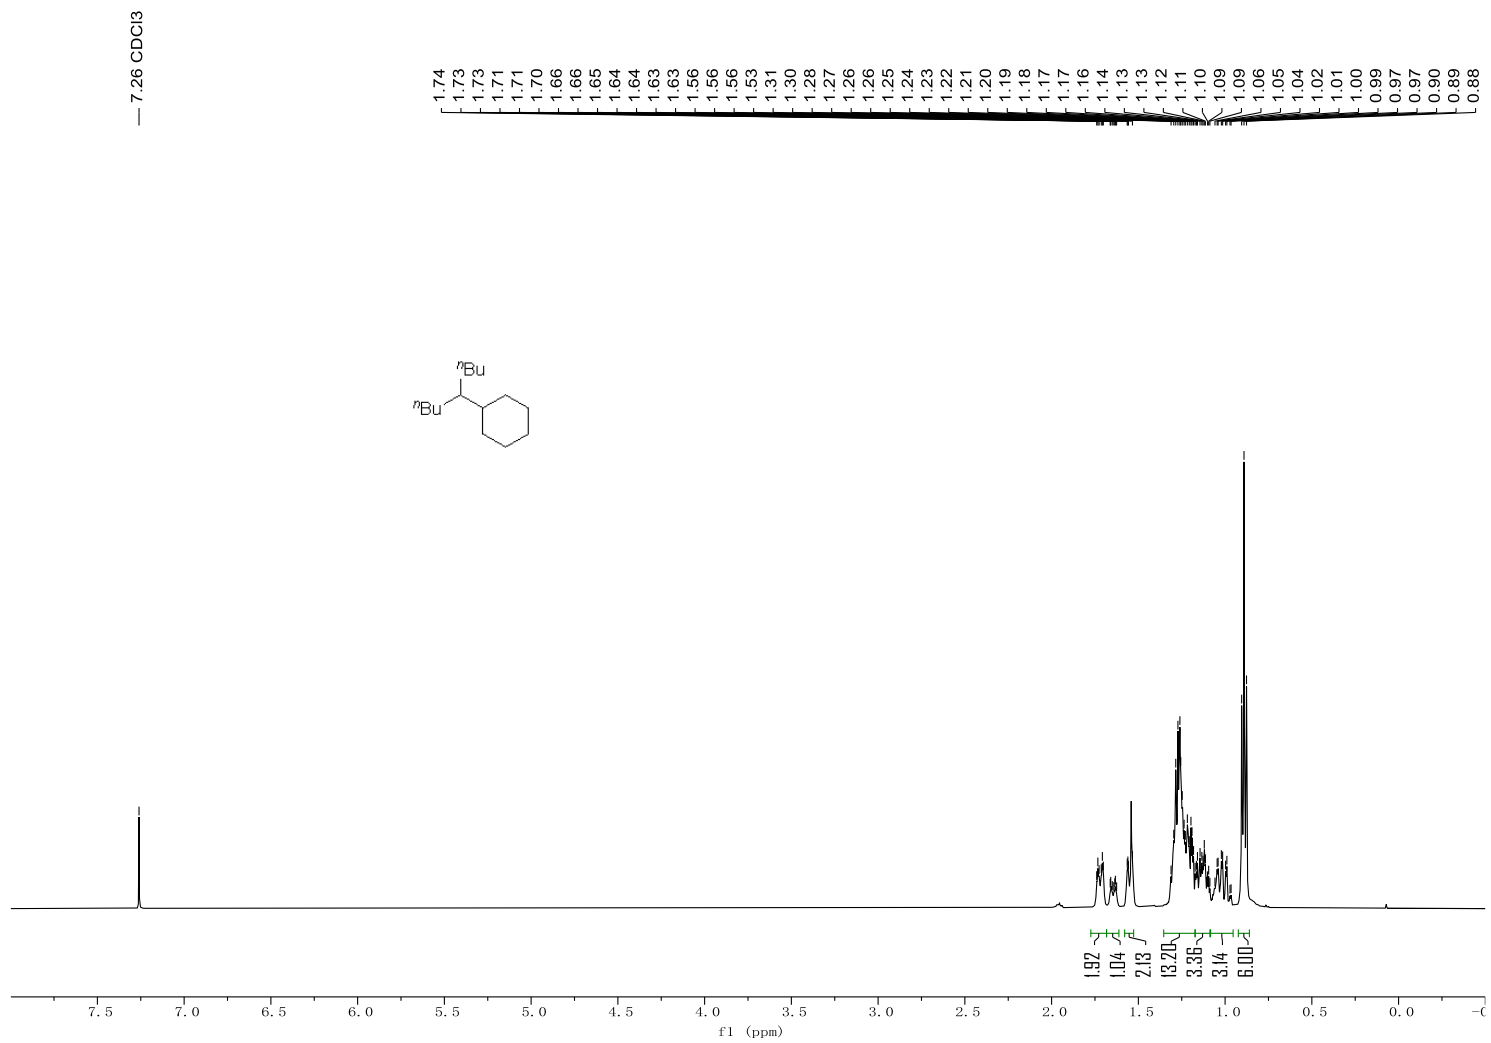

Figure S77  $^1\text{H}$  NMR of 4g

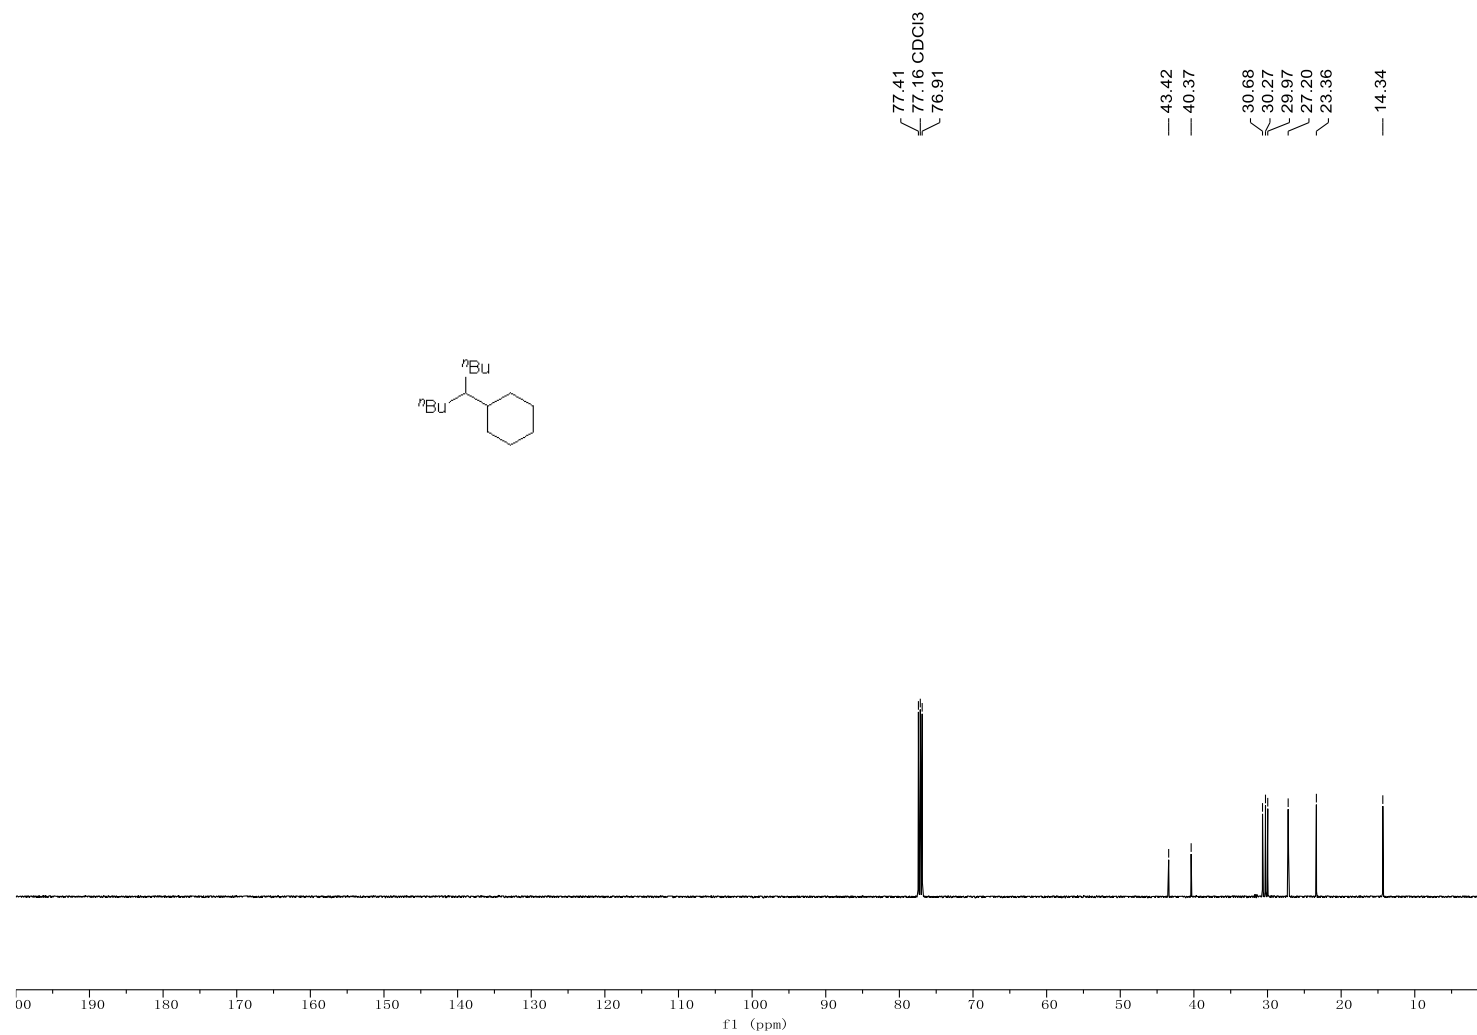

Figure S78  $^1\text{H}$  NMR of 4h

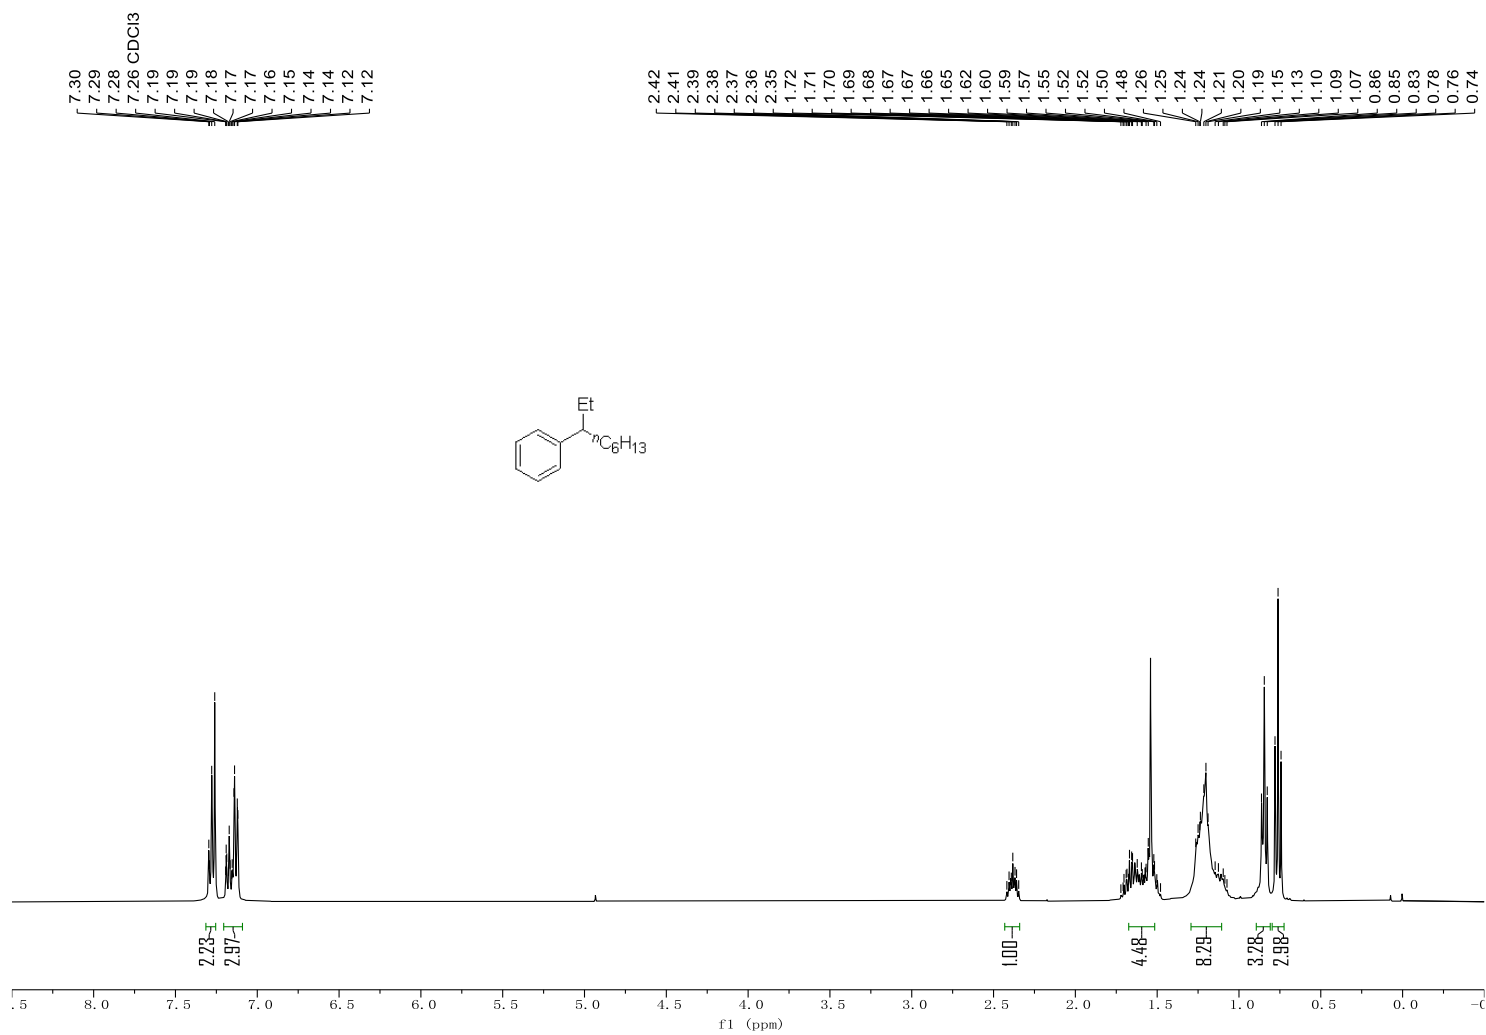

Figure S79  $^{13}\text{C}$  NMR of 4h

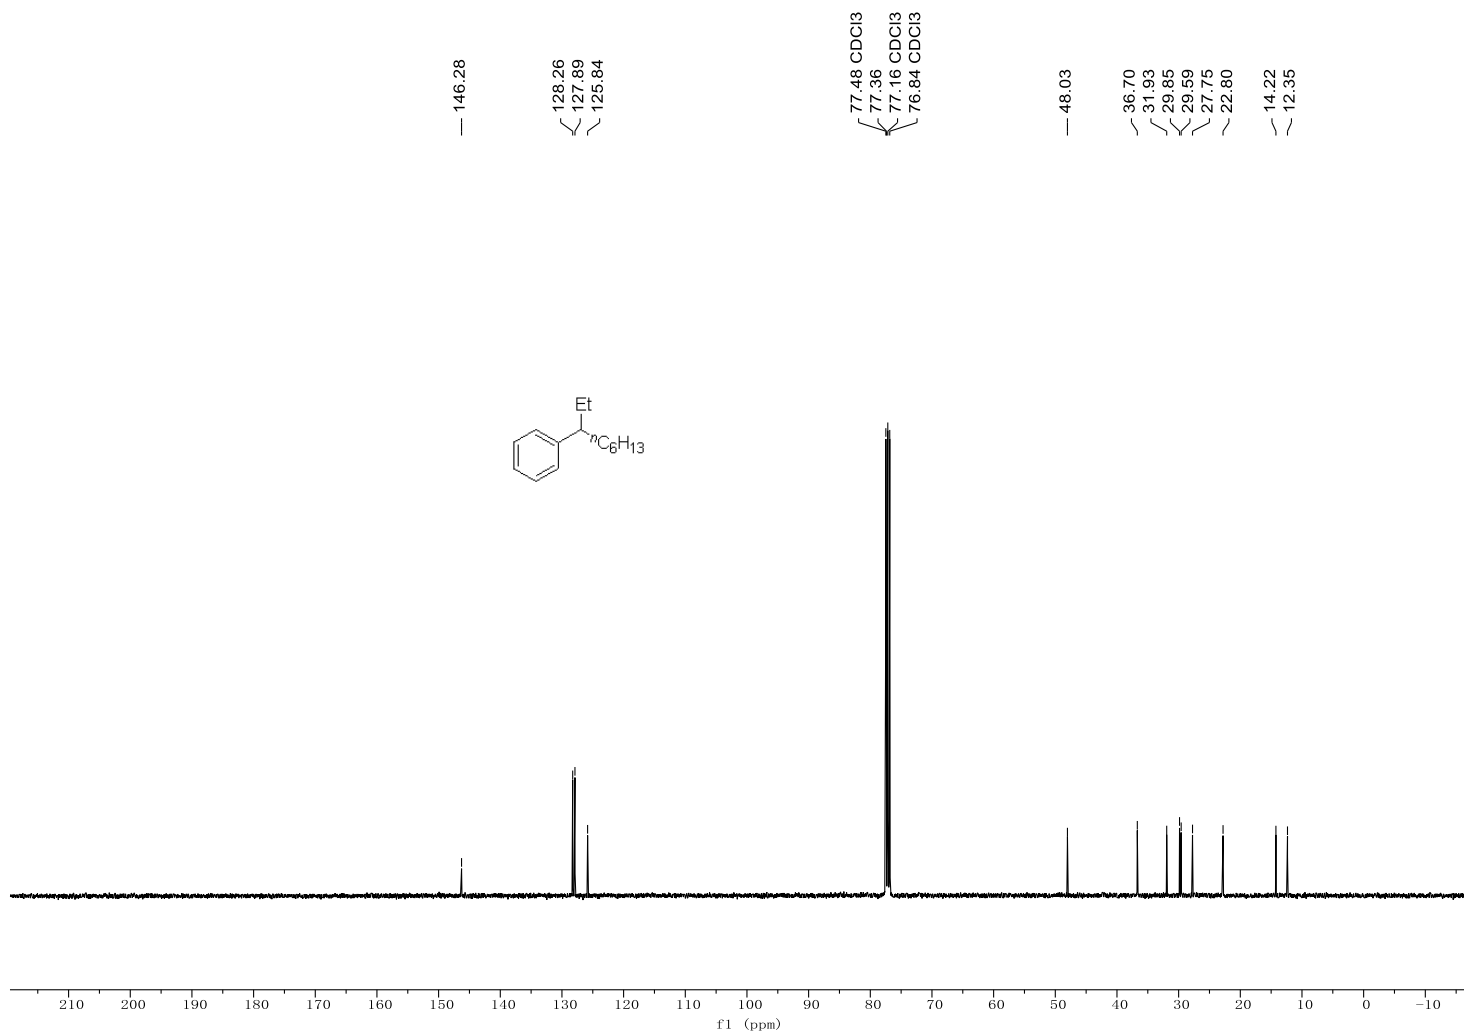





Figure S81<sup>3</sup>C NMR of 4i

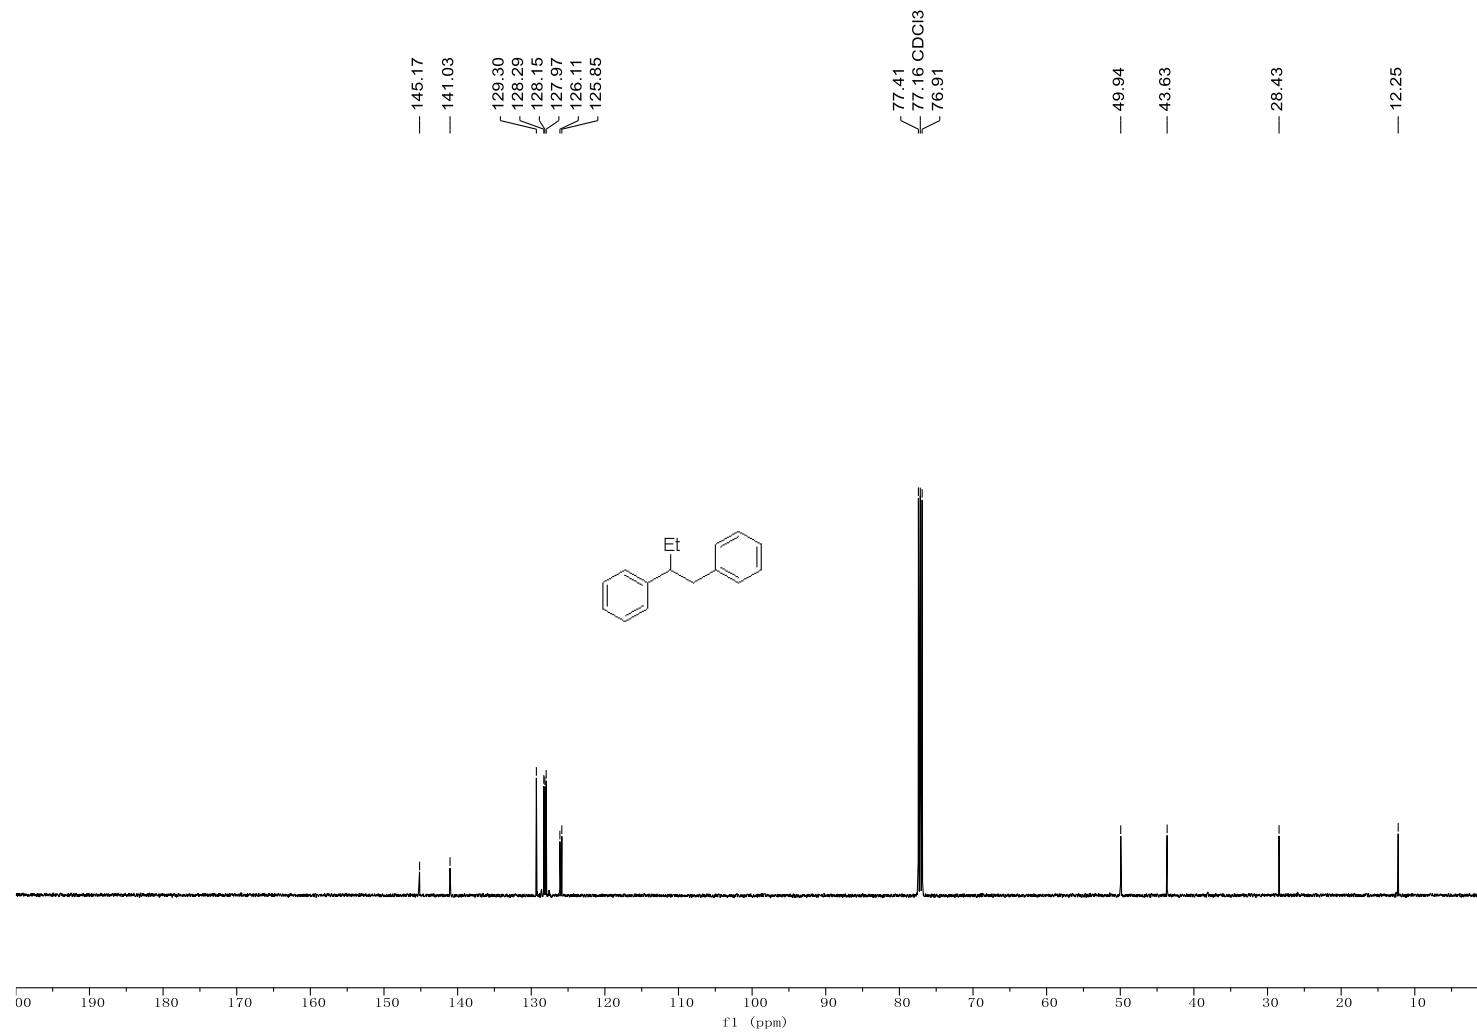

Figure S82  $^1\text{H}$  NMR of 4j

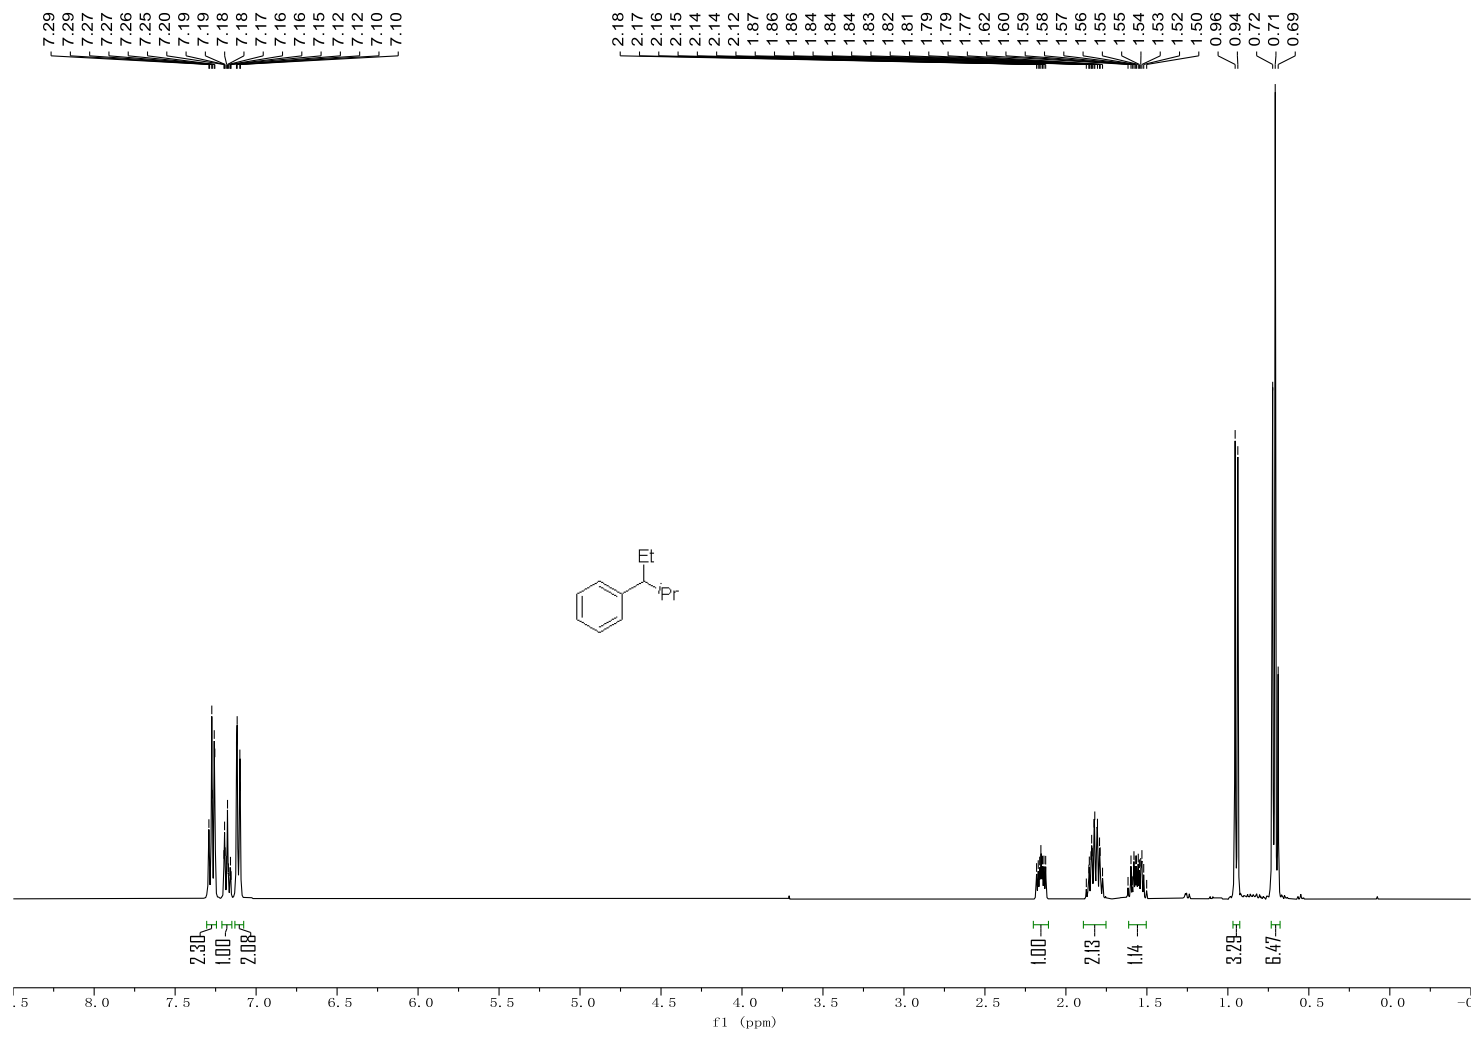

Figure S83  $^{13}\text{C}$  NMR of 4j

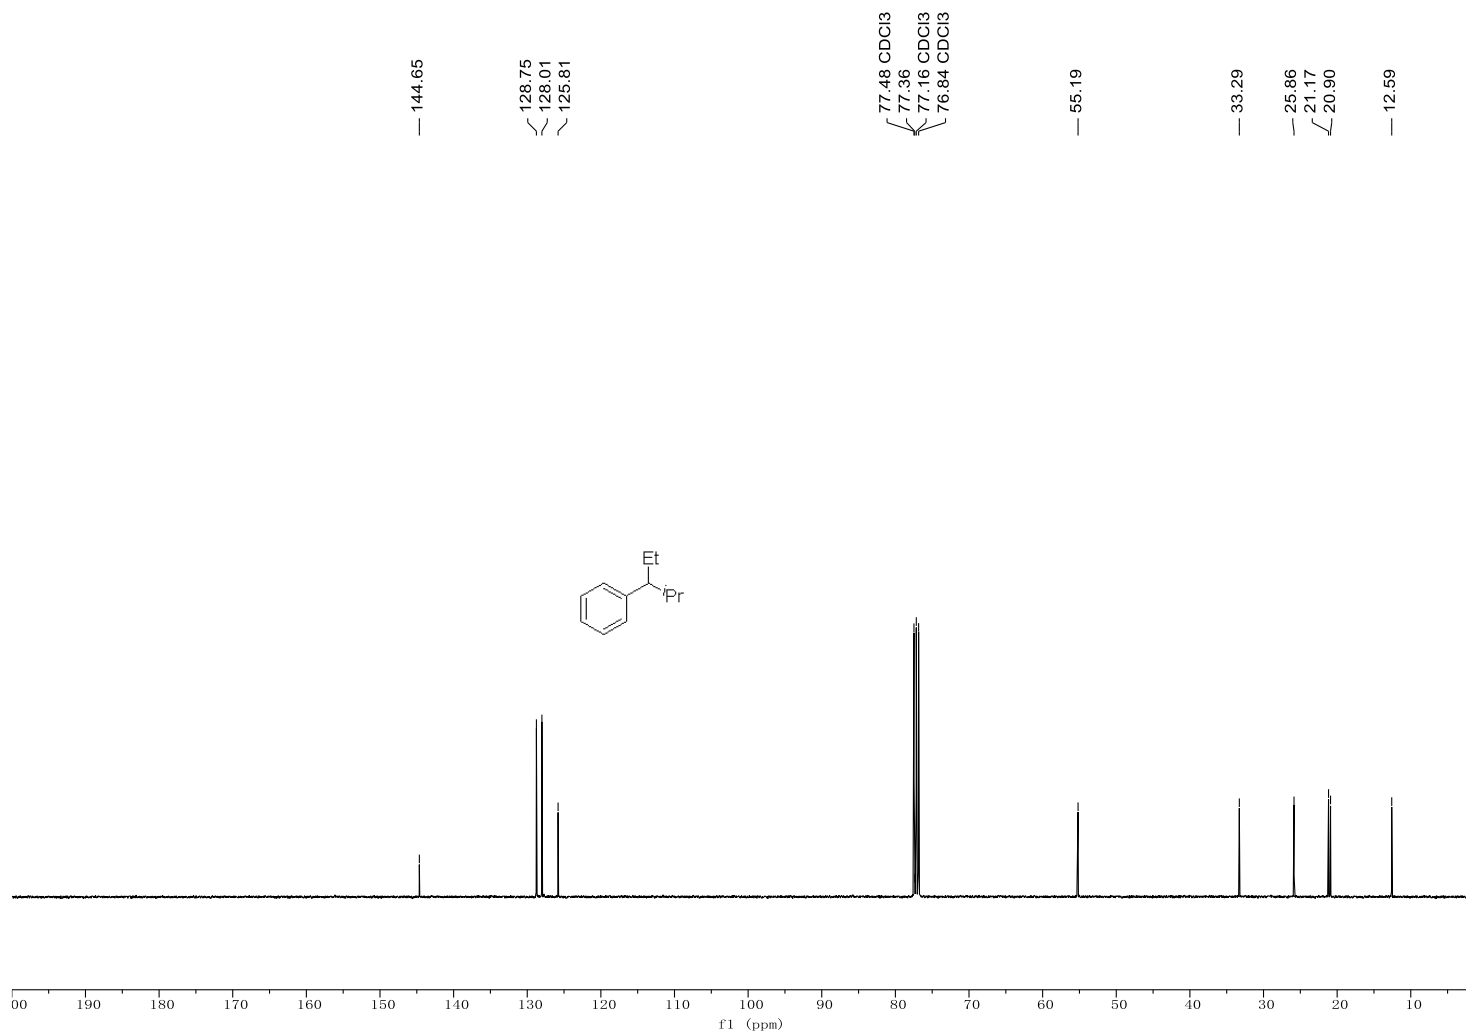

Figure S84  $^1\text{H}$  NMR of 4k

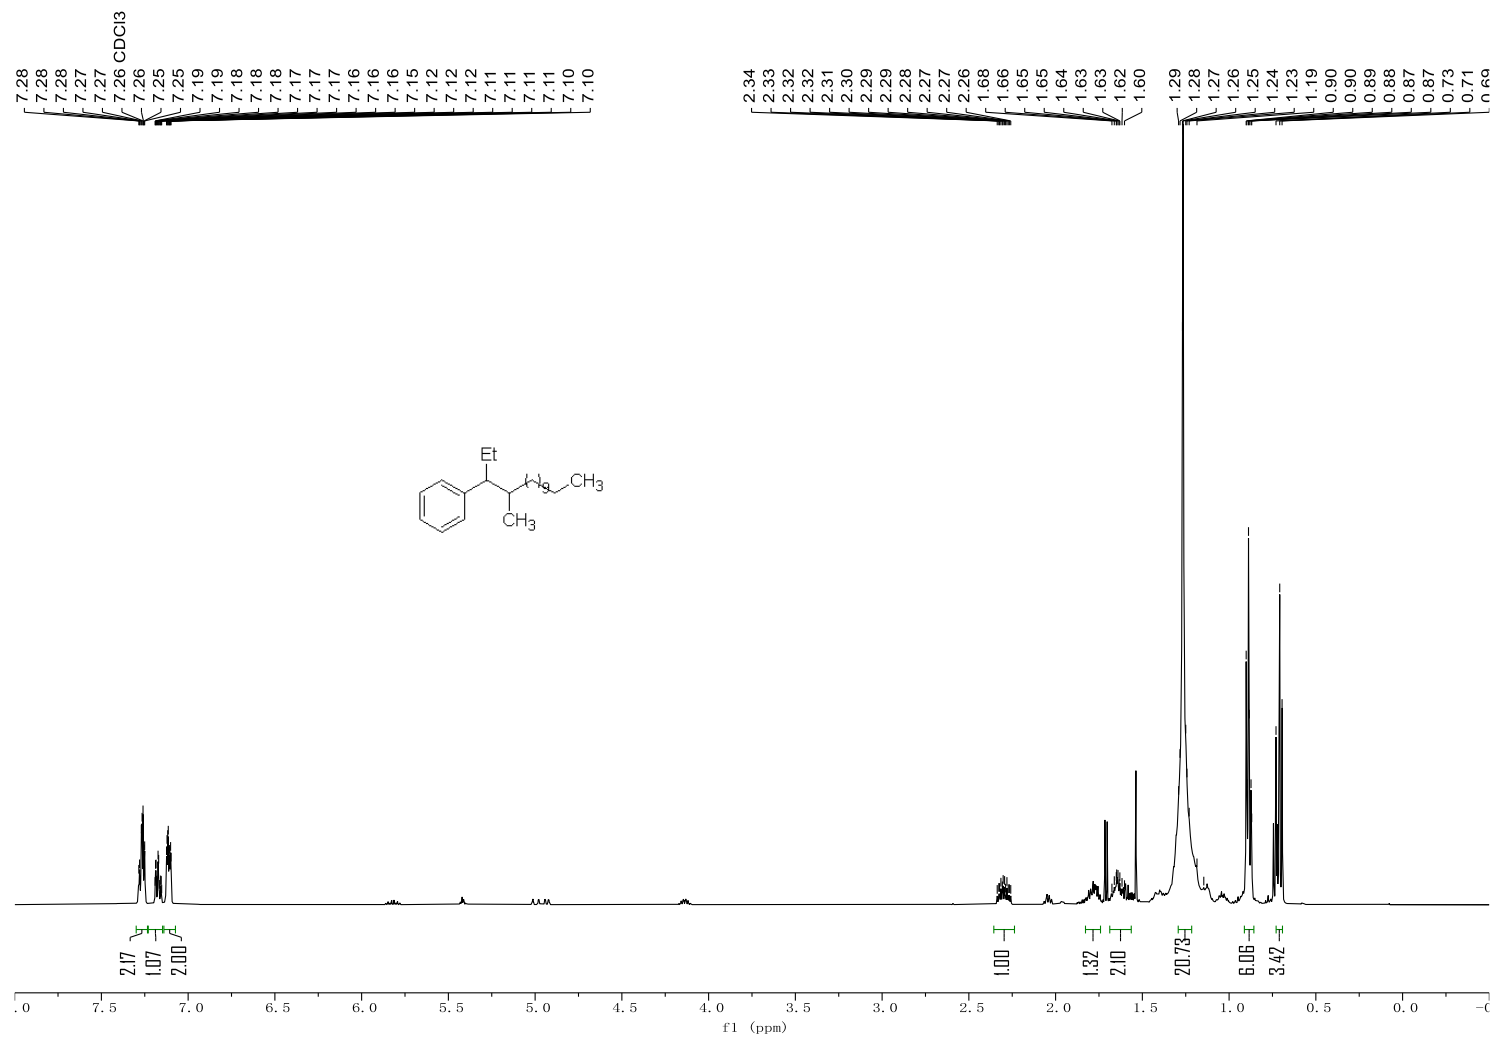

Figure S85  $^1\text{H}$  NMR of 4l

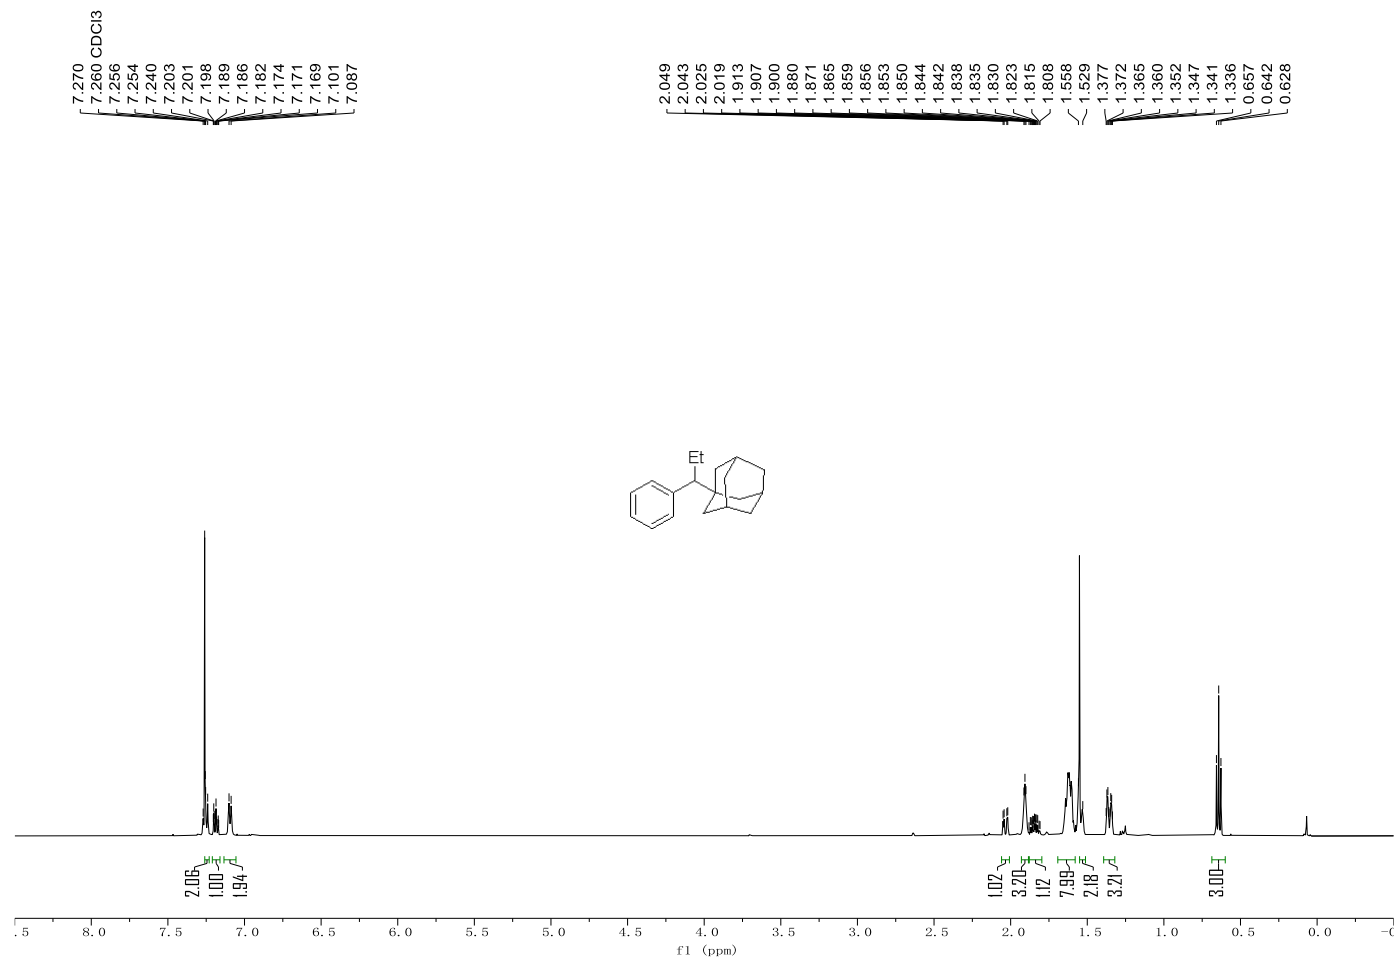

Figure S86  $^{13}\text{C}$  NMR of 4l

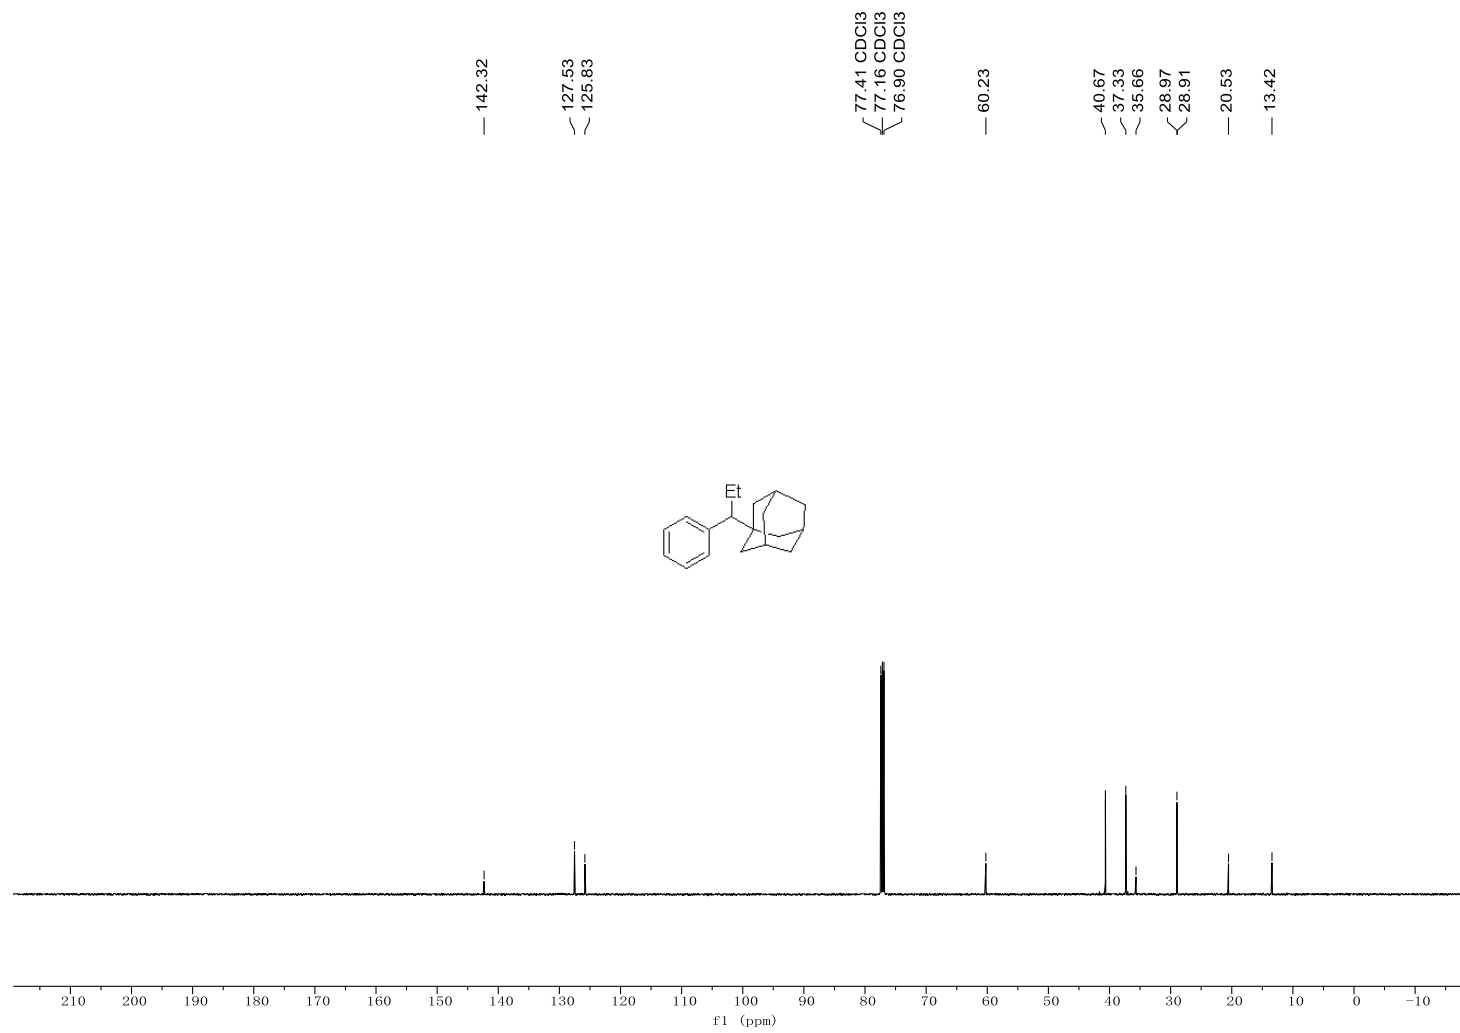

Figure S87  $^1\text{H}$  NMR of 4m

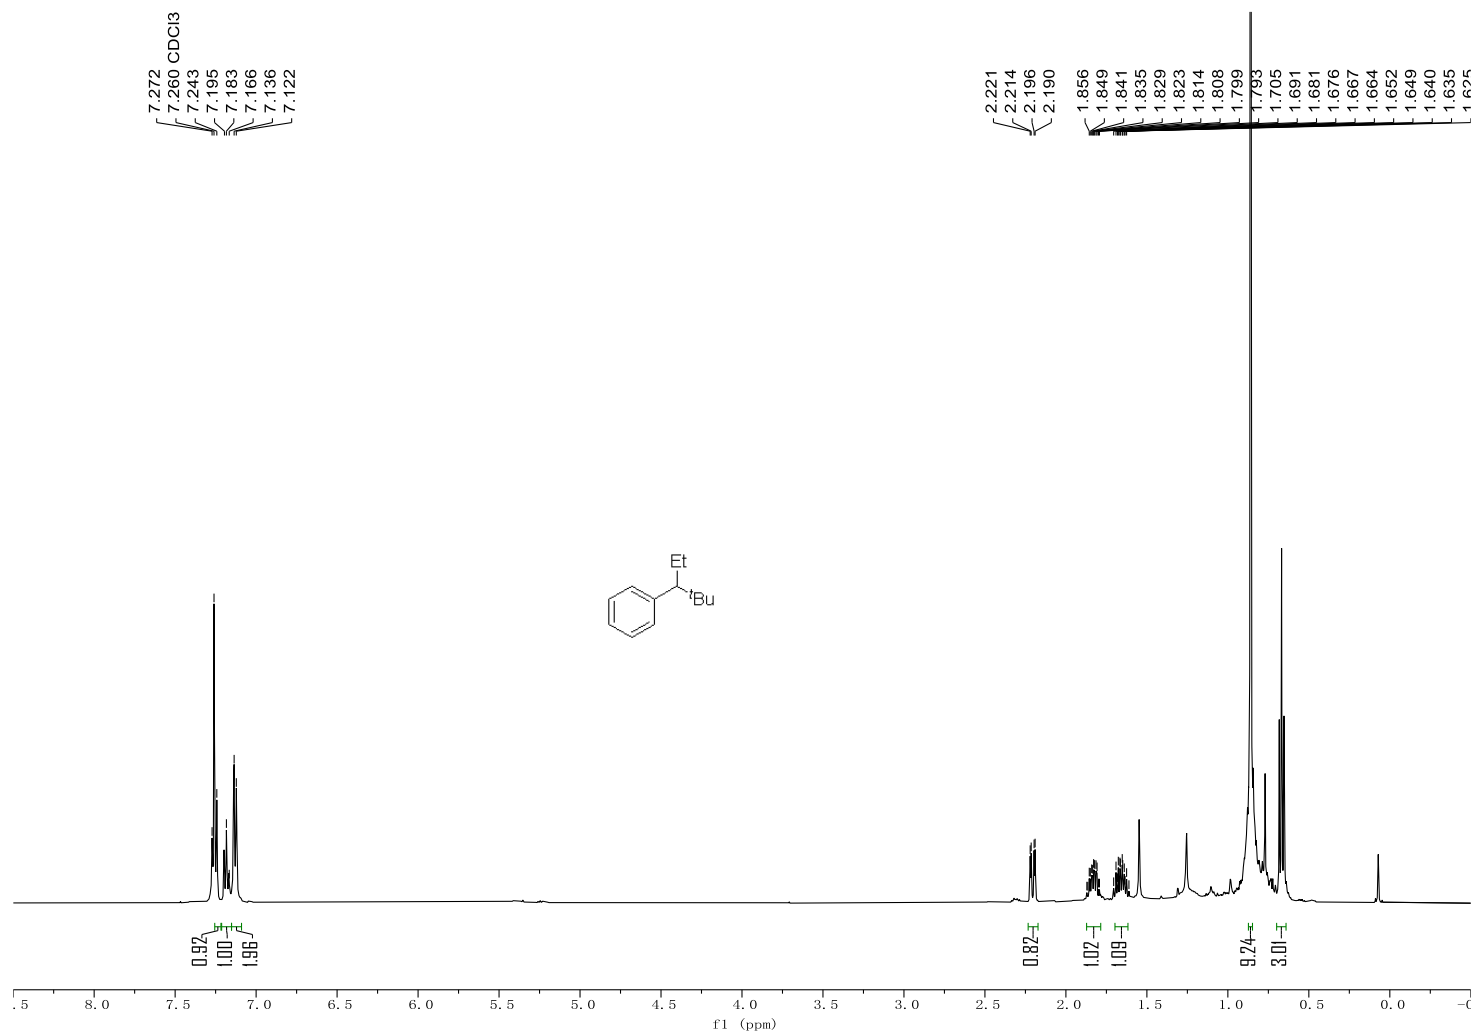

Figure S88  $^{13}\text{C}$  NMR of 4m

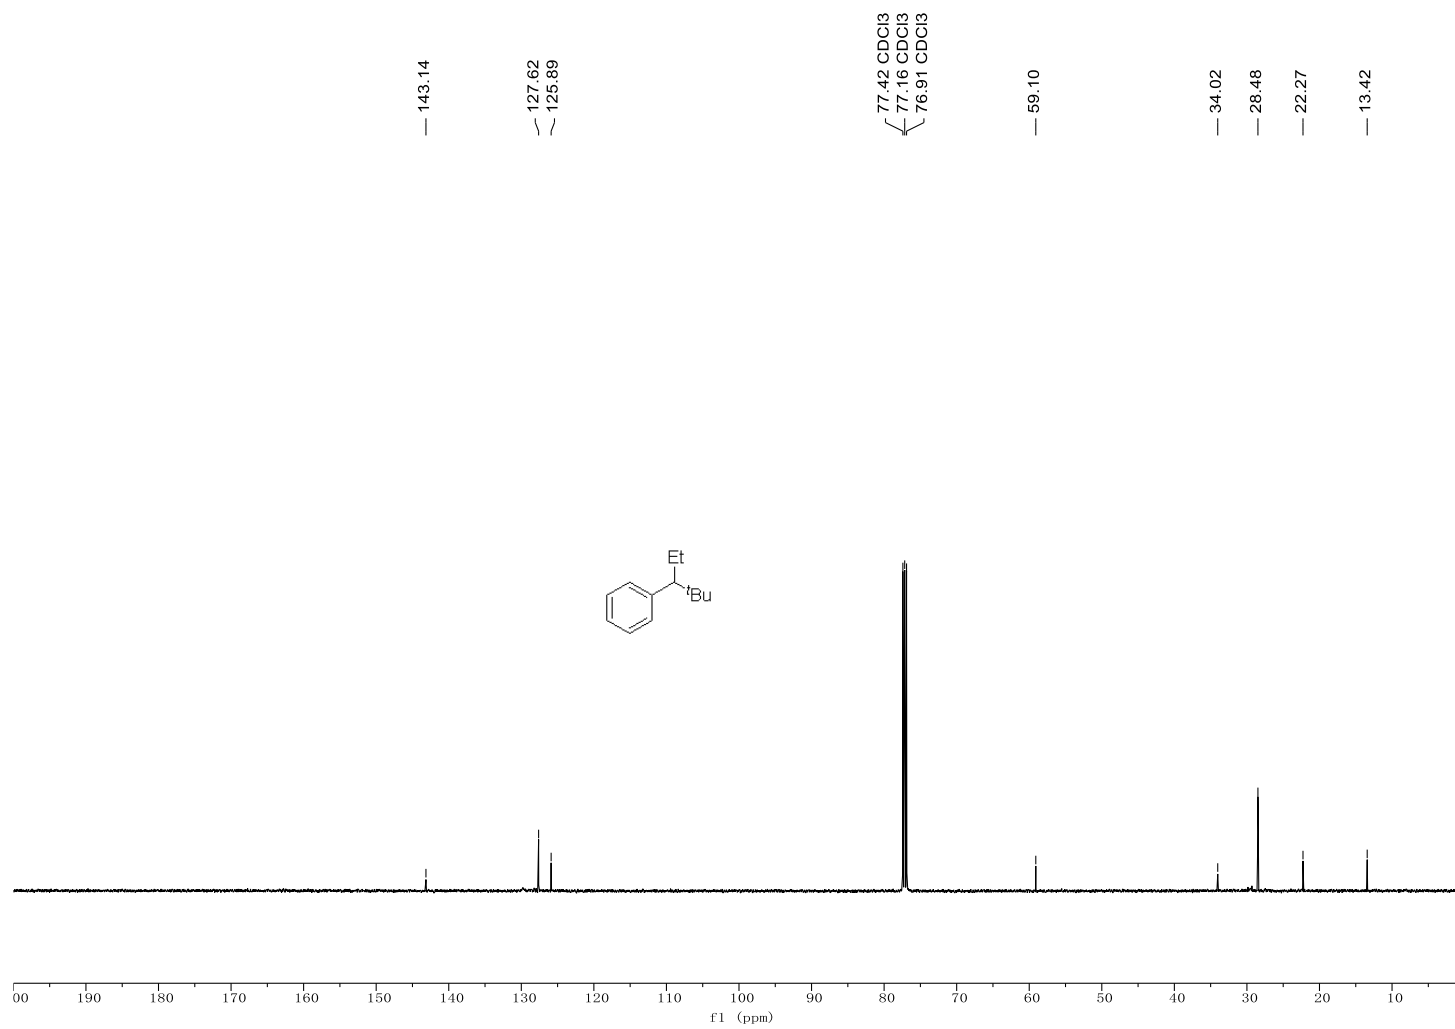



Figure S89  $^1\text{H}$  NMR of **4o** and **4o'**

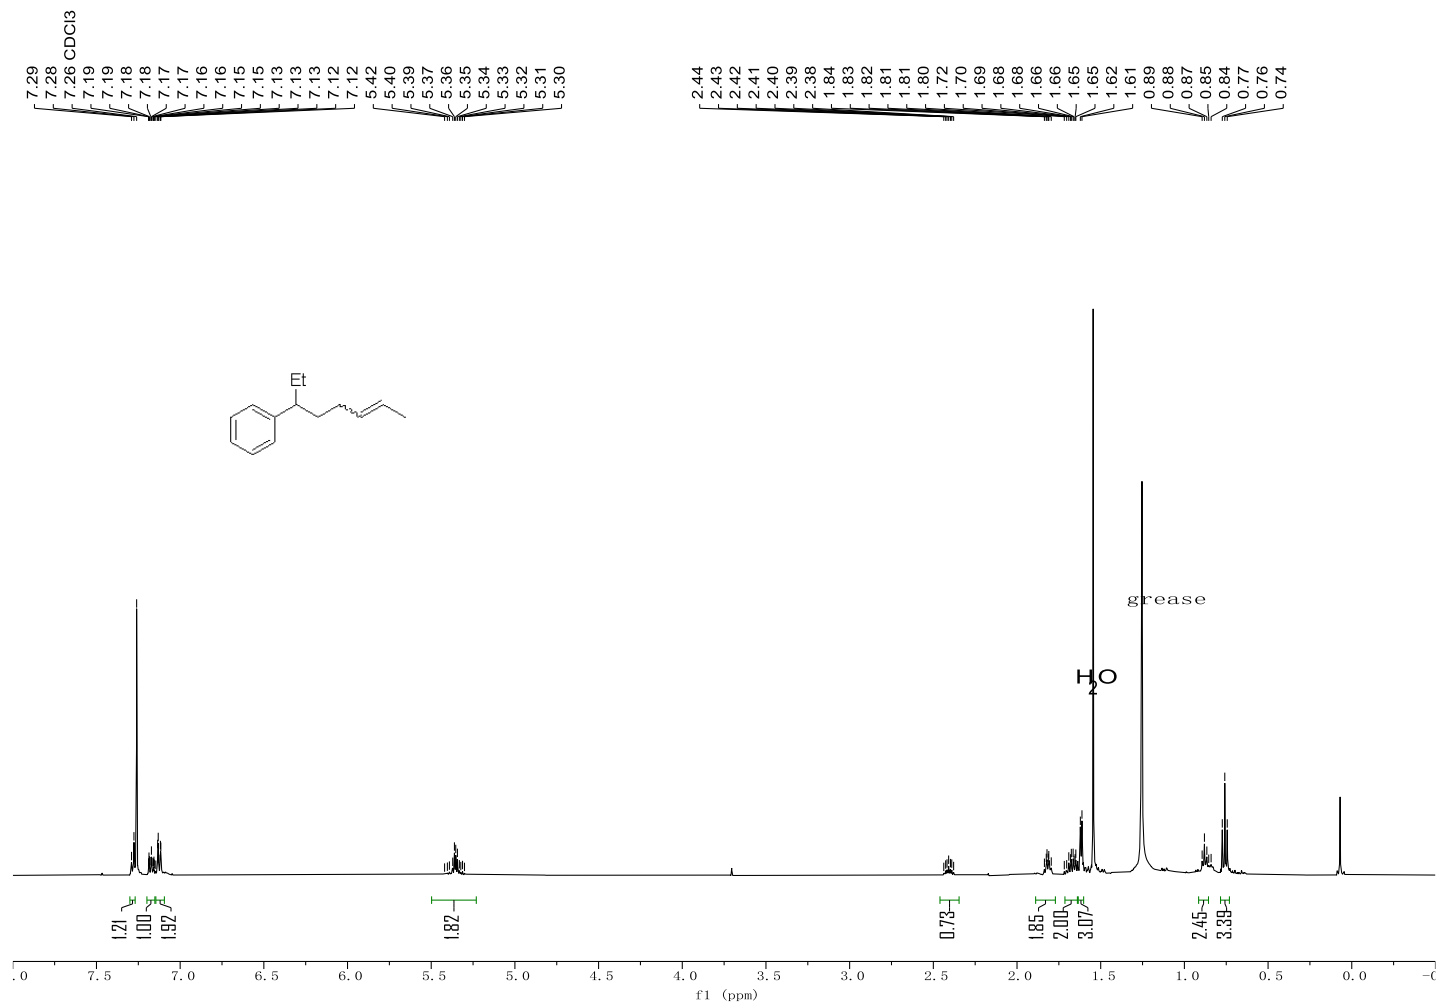

## References

- (1) Z. Yang and R. M. Koenigs, *Chem. Eur. J.*, 2021, **27**, 3694-3699.
- (2) D. Zhu, L. Lv, Z. Qiu and C. J. Li, *J. Org. Chem.*, 2019, **84**, 6312-6322.
- (3) M. Saladrigas, J. Bonjoch and B. Bradshaw, *Org. Lett.*, 2020, **22**, 2, 684-688.
- (4) G. Petruncio, S. Elahi-Mohassel, M. Girgis and M. Paige, *Tetrahedron Lett.*, 2021, **86**, 153516-153521.
- (5) A. Goeke, *PCT Int. Appl.*, 2004, WO 2004056765 A1 20040708.
- (6) G. Petruncio, S. Elahi-Mohassel, M. Girgis and M. Paige, *Tetrahedron Lett.*, 2021, **86**, 153516-153521.
- (7) K. Bailey, *Can. J. Chem.*, 1974, **52**, 2136-2138.
- (8) A. C. Colgan, R. S. J. Proctor, D. C. Gibson, P. Chuentragool, A. S. K. Lahdenpera, K. Ermanis and R. J. Phipps, *Angew. Chem. Int. Ed.*, 2022, **61**, e202200266.
- (9) (a) L. Dong, L. Lin, X. Han, X. Si, X. Liu, Y. Guo, F. Lu, S. Rudic, S. F. Parker and S. Yang, *Chem*, 2019, **5**, 1521-1536. (b) H. Du, D. Liu, M. Li, A. Otaibi, L. Raja, R. Lv and Y. Zhang, *RSC Adv.*, 2015, **5**, 79724-79728.
- (10) M. L. Czyz, M. S. Taylor, T. H. Horngren and A. Polyzos, *ACS Catal.*, 2021, **11**, 5472-5480.
- (11) K. Wang and D. O. Marler, *U.S. Pat. Appl. Publ.*, 2021, US 20210188738 A1 20210624.
- (12) P. Longo, A. Grassi and L. Oliva, *Makromol. Chem.*, 1990, **191**, 2387-2396.
- (13) I. Zeman, *Fette, Seifen, Anstrichmittel*, 1983, **85**, 207-212.
- (14) G. Bauer, C. W. Cheung and X. Hu, *Synthesis*, 2015, **47**, 1726-1732.
- (15) R. J. J. Nel and A. Klerk, *Ind. Eng. Chem. Res.* 2007, **46**, 2902-2906.
- (16) V. V. Kovalev, O. A. Fedorova and E. A. Shokova, *Zhur. Org. Khim.*, 1987, **23**, 2396-2399.
- (17) G. Uccello-Barretta, F. Balzano, R. Menicagli and P. Salvadori, *J. Org. Chem.*, 1996, **61**, 363-365.
